# Supplementary material
Source: PubMed Central journal article supplement (PMC6643257)
Supplement: AEM.00409-19-s0001.pdf [file AEM.00409-19-s0001.pdf]

## Supplementary Information

*Ascomycota Aspergillus oryzae* is an efficient expression host for production of Basidiomycota terpenes using genomic DNA sequences

Shota Nagamine, Chengwei Liu, Jumpei Nishishita, Takuto Kozaki, Kaho Sogahata, Yoshiro Sato, Atsushi Minami\*, Taro Ozaki, Claudia Schmidt-Dannert, Junichi Maruyama and Hideaki Oikawa\*

(A)

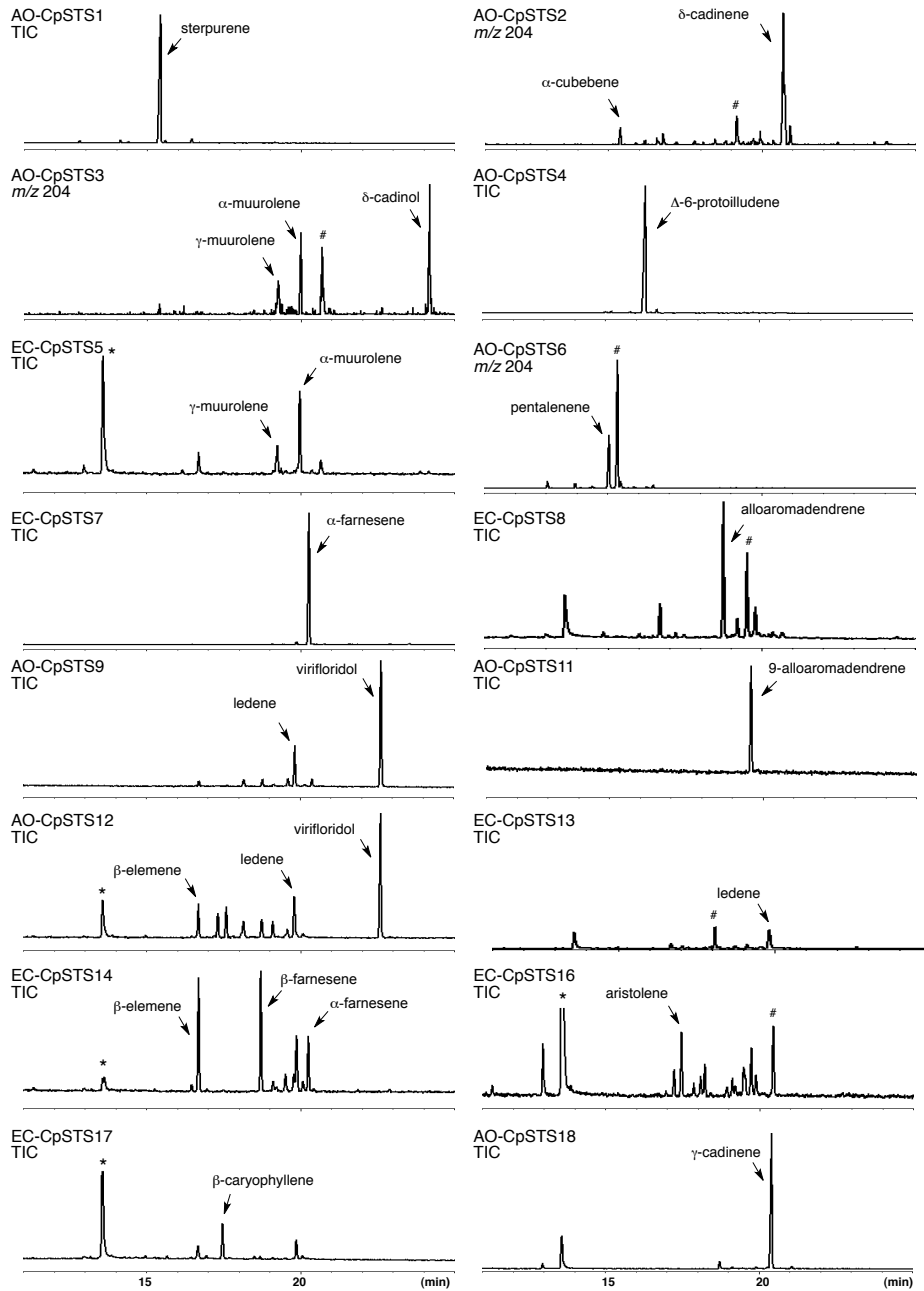

**Figure S1.** GC-MS profiles of sesquiterpenes produced by (A) CpSTSs and (B) ShSTSs. *Aspergillus oryzae* (AO) transformants harbor the genomic DNA sequence and *Escherichia coli* (EC) transformants do the corrected cDNA sequence. # shows an uncharacterized sesquiterpene. \* shows indole produced by *E. coli* cells. Mass spectra of the sesquiterpenes obtained from (C) transformants harboring CpSTS genes and (D) those harboring ShSTS genes. Retention time is shown in the parenthesis.

(B)

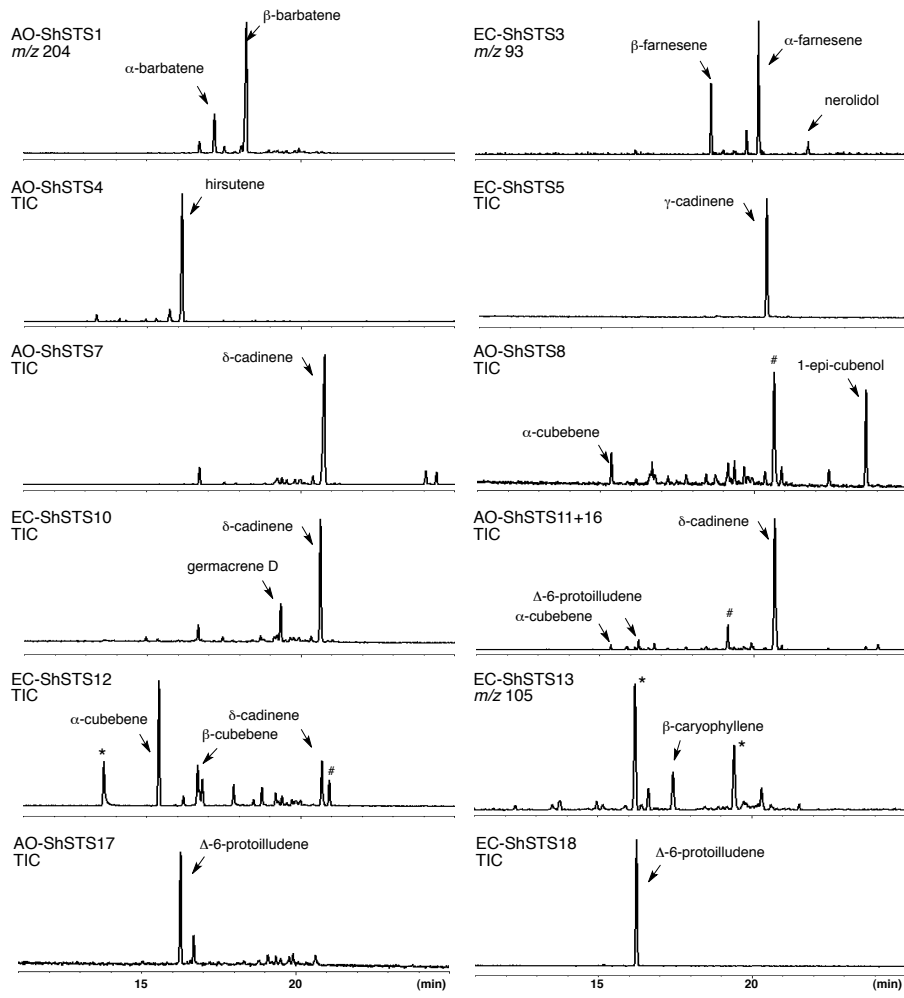

Figure S1. Continued.

(C)

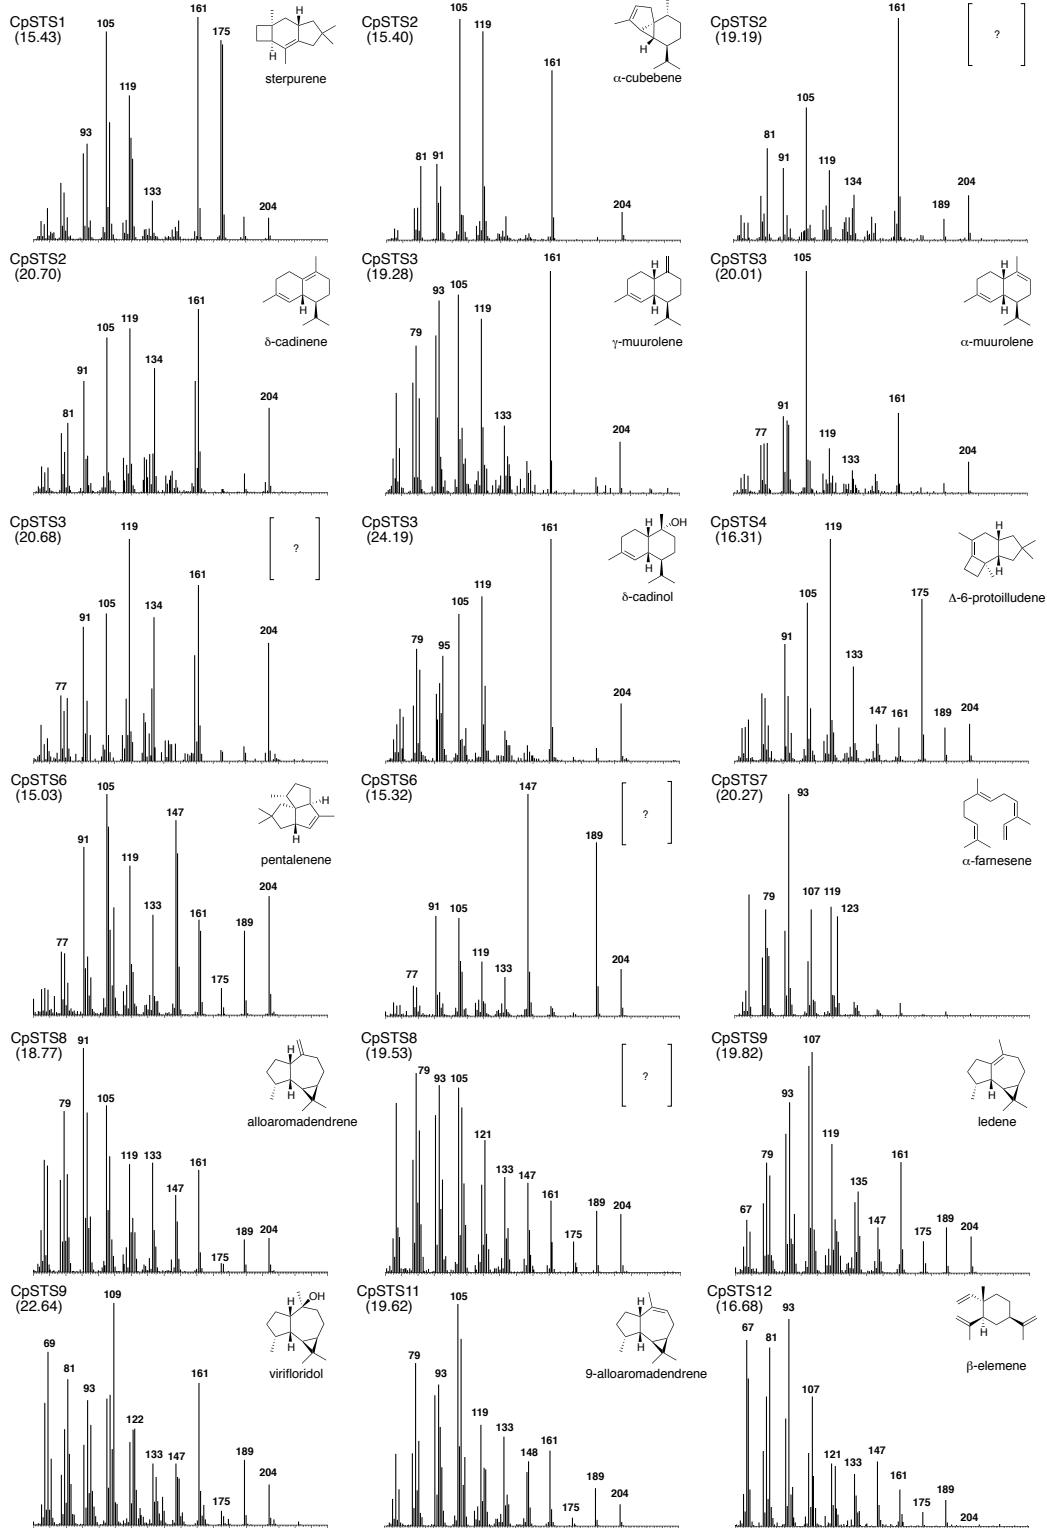

Figure S1. Continued.

(C)

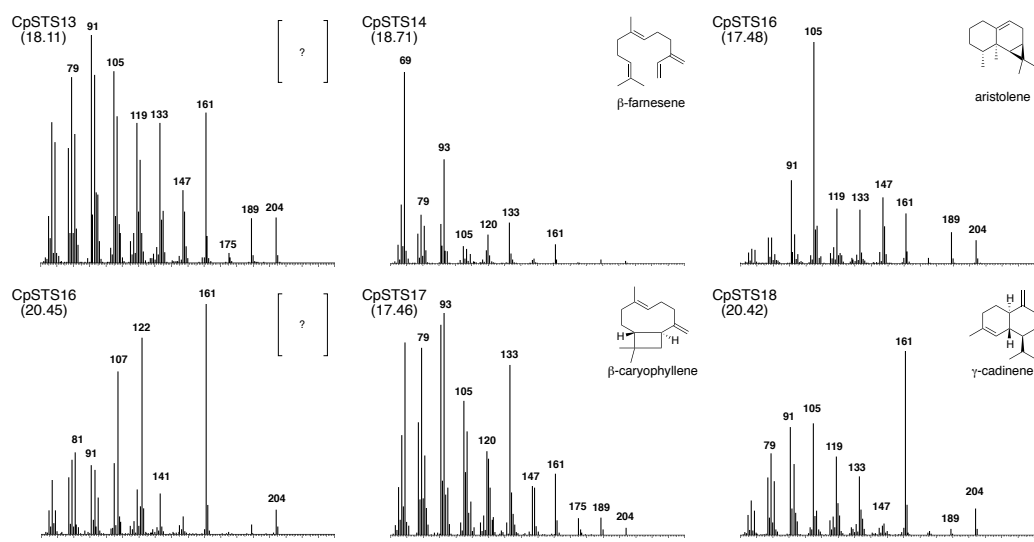

Figure S1. Continued.

(D)

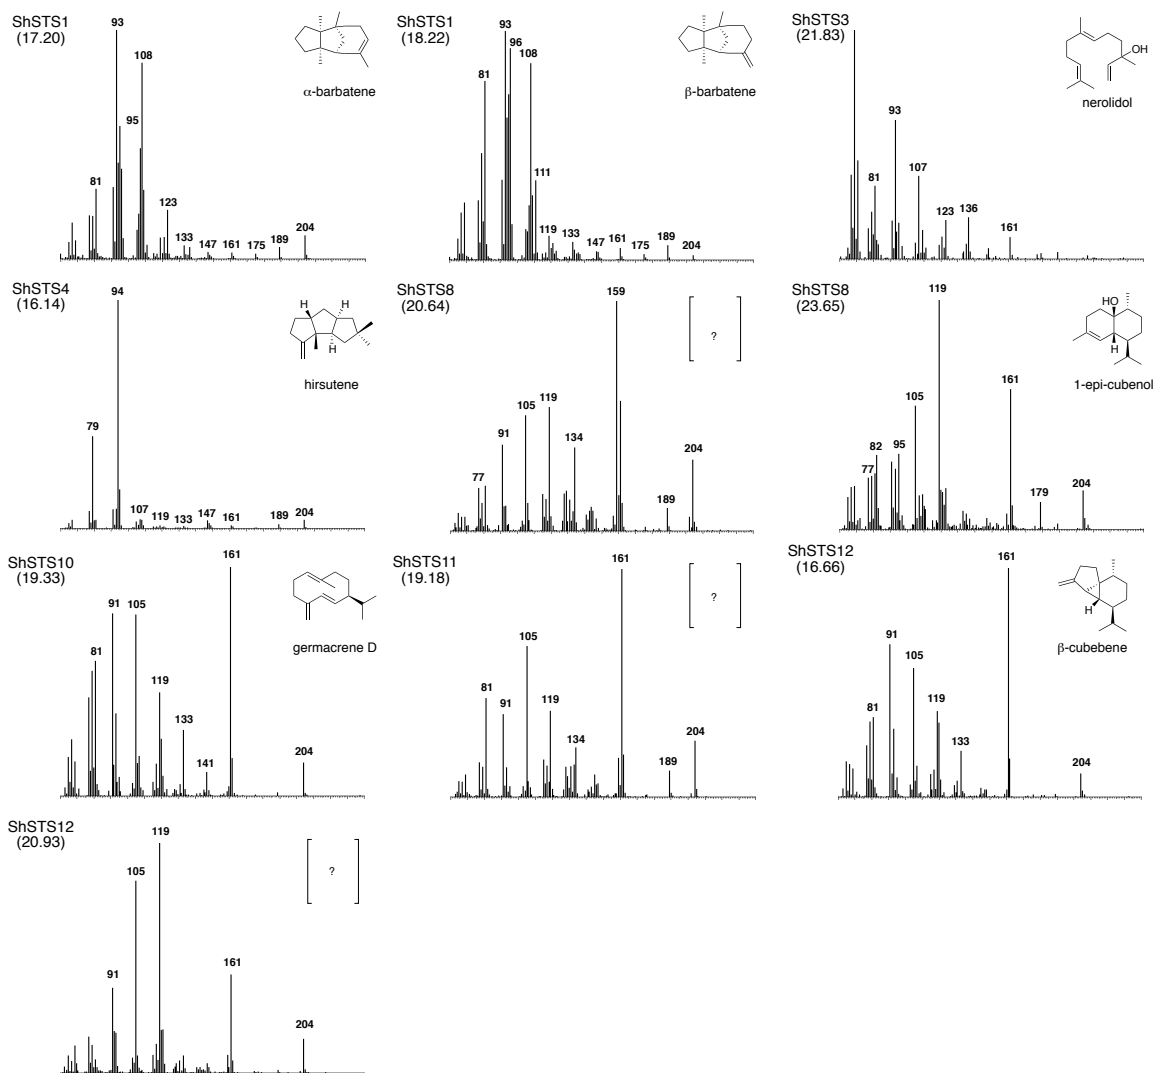

Figure S1. Continued.

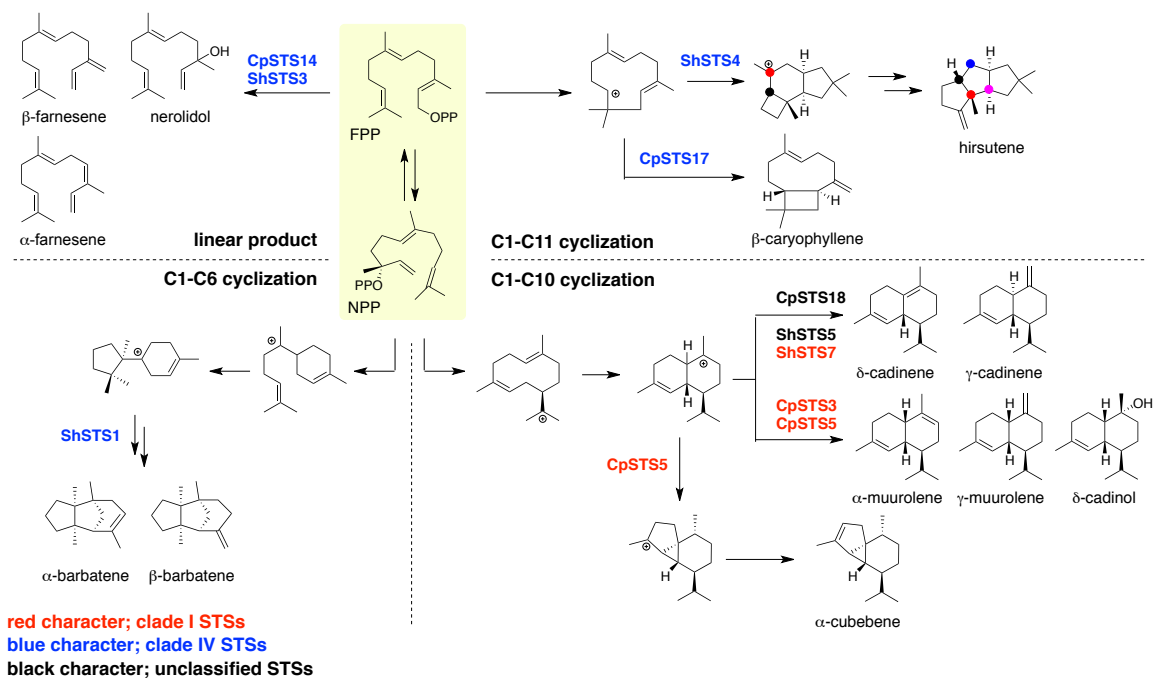

**Figure S2.** Proposed cyclization mechanisms of sesquiterpenes produced by clades I and IV STSs and unclassified STSs.

**(A) Misspliced intron by *A. oryzae***

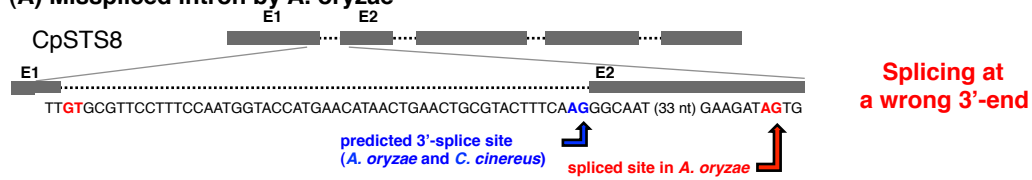

**(B) Mispredicted introns by Augustus**

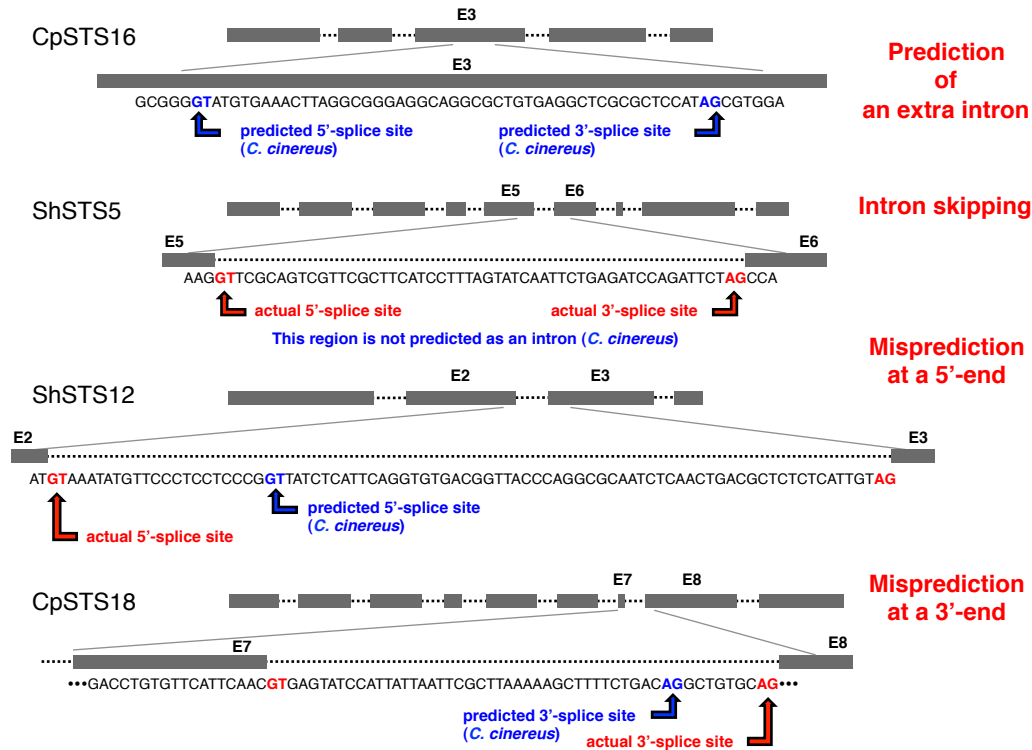

**Figure S3.** Schematic view of (A) misspliced intron (CpSTS8-intron 1) in *A. oryzae* and (B) mispredicted introns by Augustus (*C. cinereus* prediction).



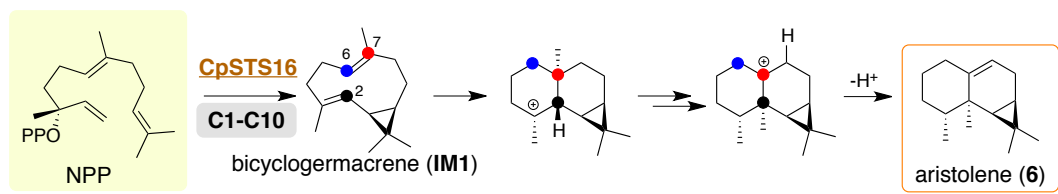

**Fig S4.** Alternative cyclization mechanism leading to aristolene.

(A) clade II\_CpSTSSs

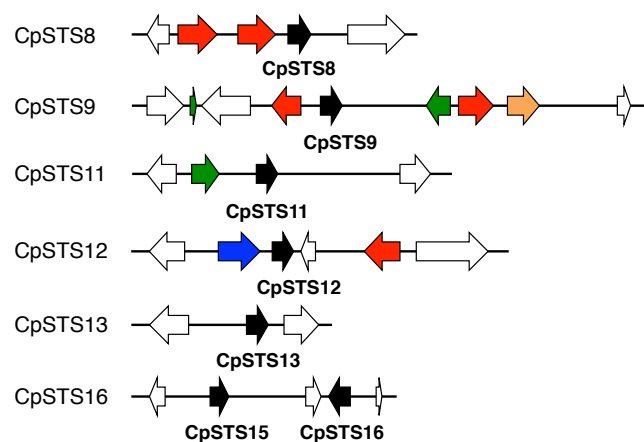

(B) clade II\_ShSTSSs

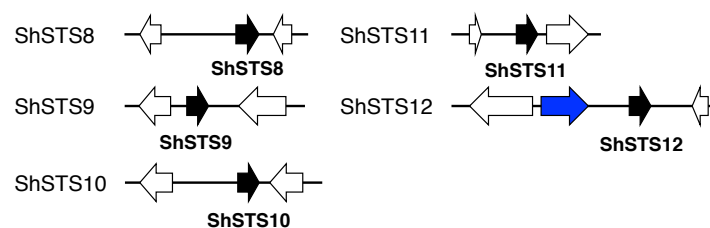

(C) clade III\_ShSTSSs

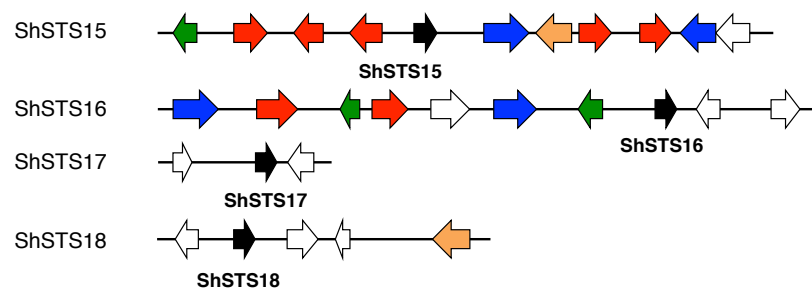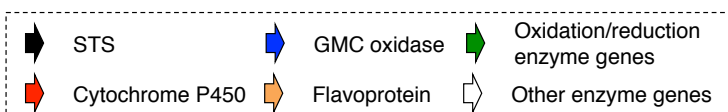

**Figure S5.** Schematic views of the putative biosynthetic gene clusters of (A) clade II\_CpSTSSs, (B) clade II\_ShSTSSs, and (C) clade III\_ShSTSSs.

(A)  $^1\text{H}$ -NMR spectrum

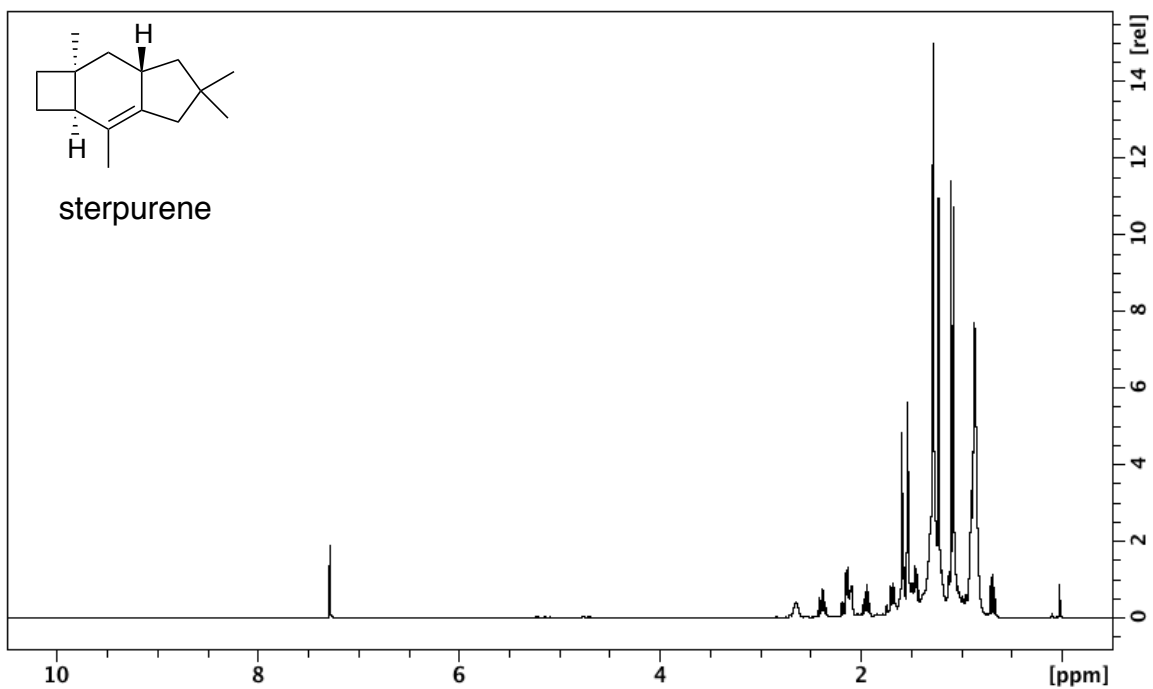

(B)  $^1\text{H}$ -NMR spectrum

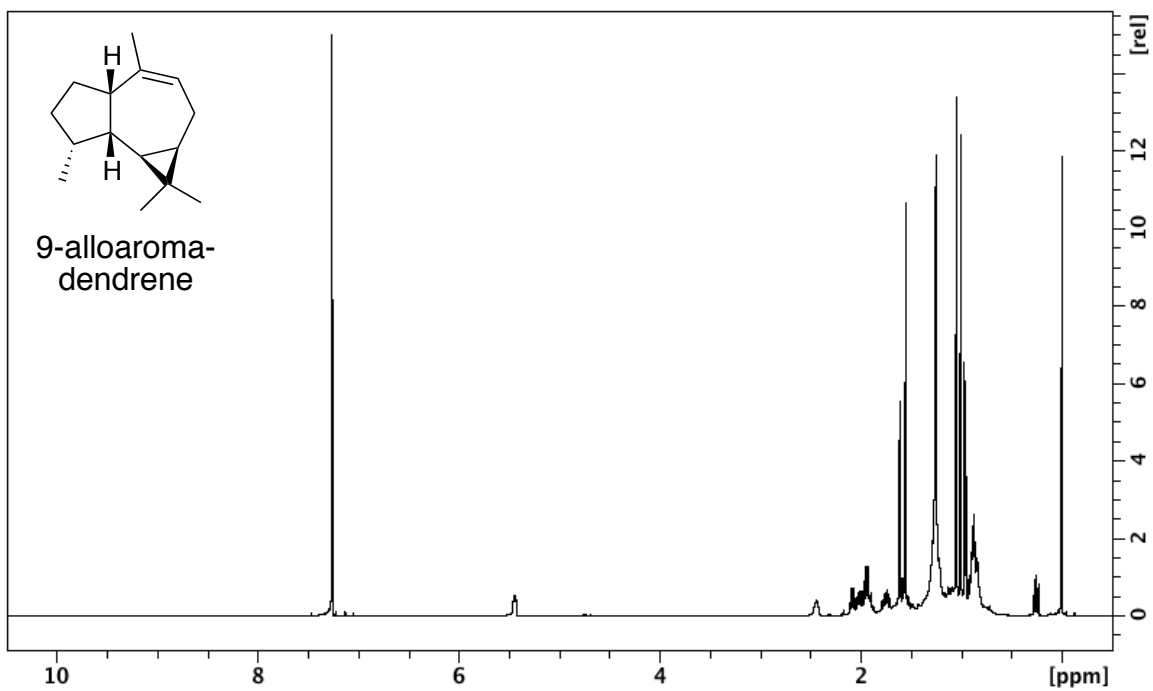

**Figure S6.** NMR spectra of (A) sterpurene and (B) 9-alloaromadendrene.

**Table S1.** Sesquiterpene synthases (STSs) found in *Clitopilus pseudo-pinsitus* and *Stereum hirsutum*. Function of ShSTS15 marked by \* was not examined in this study but was reported in the previous study (*ChemBioChem* 2013, 14, 2480-2491.).

| Gene name | Accession No. | DDxxD motif | NSE motif | Classification | Number of introns | Main product                       | Comment |
|-----------|---------------|-------------|-----------|----------------|-------------------|------------------------------------|---------|
| CpSTS1    | LC436345      | DEYTD       | NDMCSYKKE | clade III      | 4                 | sterpene                           |         |
| CpSTS2    | LC436346      | DELS        | NDVSYDME  | clade II       | 4                 | alpha-cubebene, delta-cadinene     |         |
| CpSTS3    | LC436347      | DNIS        | NDIFSYNVE | clade I        | 5                 | alpha-murolene, delta-cadinol      |         |
| CpSTS4    | LC436348      | DEYTD       | NDLCSFRNE | clade III      | 4                 | 6-protoilludene                    |         |
| CpSTS5    | LC436349      | DNSLD       | NDIFSYNVE | clade I        | 3                 | gamma-murolene, alpha-murolene     |         |
| CpSTS6    | LC436350      | DEYS        | NDLYSYNVE | clade III      | 5                 | pentalenene                        |         |
| CpSTS7    | LC436351      | DEITE       | NDVFSKVE  | clade III      | 4                 | alpha-farnesene                    |         |
| CpSTS8    | LC436352      | DEYTD       | NDVSYNME  | clade II       | 4                 | alloaromadendrene                  |         |
| CpSTS9    | LC436353      | DEYTD       | NDLFSYNME | clade II       | 4                 | ledene, virifloridol               |         |
| CpSTS10   | LC436354      | No motif    | No motif  | N. E.          | 2                 | -                                  |         |
| CpSTS11   | LC436355      | DEATD       | NDIFSYNME | clade II       | 4                 | 9-alloaromadendrene                |         |
| CpSTS12   | LC436356      | DEYTD       | NDLYSYNME | clade II       | 4                 | beta-elemene, ledene, virifloridol |         |
| CpSTS13   | LC436357      | DETTD       | NDIQSYNME | clade II       | 5                 | ledene                             |         |
| CpSTS14   | LC436358      | DDYILE      | NDIYSYKVE | clade IV       | 2                 | beta-elemene, beta-farnesene       |         |
| CpSTS15   | LC436359      | DDLME       | NDLFSYRKE | N. E.          | 2                 | No products                        |         |
| CpSTS16   | LC436360      | DESSD       | NDIHSYNME | clade II       | 4                 | aristolene                         |         |
| CpSTS17   | LC436361      | DDIIE       | NDLFSYRVE | clade IV       | 2                 | beta-caryophyllene                 |         |
| CpSTS18   | LC436362      | DDLSD       | NDLCSFNKE | other clade    | 8                 | gamma-cadinene                     |         |

| Gene name | Accession No. | DDxxD motif | NSE motif | Classification | Number of introns | Main product                    | Comment                    |
|-----------|---------------|-------------|-----------|----------------|-------------------|---------------------------------|----------------------------|
| ShSTS1    | Stehil159379  | DDSLE       | NDLMSFYKE | clade IV       | 2                 | alpha-barbatene, beta-barbatene |                            |
| ShSTS2    | Stehil113028  |             |           | clade IV       |                   | -                               | 62 % identity with ShSTS1  |
| ShSTS3    | Stehil122776  | DDYID       | NDFFSYLKE | clade IV       | 6                 | beta-farnesene, alpha-farnesene |                            |
| ShSTS4    | Stehil52743   | DDYID       | NDFFSYLKE | clade IV       | 14                | hirstene                        |                            |
| ShSTS5    | Stehil161672  | DDLSD       | NDLCSFNKE | other clade    | 8                 | gamma-cadinene                  |                            |
| ShSTS6    | Stehil45387   |             |           | clade I        |                   | -                               | 60 % identity with CpSTS3  |
| ShSTS7    | Stehil167646  | DDWTD       | NDIFSYNVE | clade I        | 3                 | delta-cadinene                  |                            |
| ShSTS8    | Stehil146390  | DEIS        | NDIYSYDME | clade II       | 4                 | alpha-cubebene, 1-epi-cubenol   |                            |
| ShSTS9    | Stehil155443  |             |           | clade II       |                   | -                               | 68 % identity with ShSTS8  |
| ShSTS10   | Stehil111121  | DEIS        | NDVSYKVE  | clade II       | 3                 | germacrene D, delta-cadinene    |                            |
| ShSTS11   | Stehil128017  | DEIS        | NDVSYNVE  | clade II       | 3                 | alpha-cubebene, delta-cadinene  |                            |
| ShSTS12   | Stehil111127  | DEIS        | NDVSYNME  | clade II       | 3                 | alpha-cubebene, beta-cubebene   |                            |
| ShSTS13   | Stehil50042   | DDILD       | NDTFSYRRE | clade III      | 5                 | beta-caryophyllene              |                            |
| ShSTS14   | Stehil70268   |             |           | clade III      |                   | -                               | 66 % identity with ShSTS13 |
| ShSTS15*  | Stehil64702   | DEHSD       | NDIVSYNIE | clade III      |                   | delta-6-protoilludene           |                            |
| ShSTS16   | Stehil73029   | DEYS        | NDIVSYNLE | clade III      | 4                 | delta-6-protoilludene           |                            |
| ShSTS17   | Stehil69906   | DEHSD       | NDIVSWNLE | clade III      |                   | delta-6-protoilludene           |                            |
| ShSTS18   | Stehil25180   | DEYS        | NDICSYNVE | clade III      | 4                 | delta-6-protoilludene           |                            |

N. E.; not examined

**Table S2.** Identification of sesquiterpenes described in this study. Sesquiterpenes were identified by comparing retention times, retention indices, and mass spectra with those of reported data.

| CpSTS          | ShSTS              | Product               | retention time | RI_observed | RI_lit. (NIST) | RI_lit. (mass finder) | Comment                                                                                                  |
|----------------|--------------------|-----------------------|----------------|-------------|----------------|-----------------------|----------------------------------------------------------------------------------------------------------|
| CpSTS6         |                    | pentalenene           | 15.03          | 1337        |                | 1343                  |                                                                                                          |
| CpSTS2         | ShSTS8, 11, 12     | alpha-cubebene        | 15.35          | 1347        | 1351 (HP-5)    |                       | doi:10.1016/j.jep.2006.04.018                                                                            |
| CpSTS1         |                    | sterpurene            | 15.43          | 1350        |                | 1351                  | See Figure S8                                                                                            |
|                | ShSTS4             | hirsutene             | 16.14          | 1372        |                | 1378                  |                                                                                                          |
| CpSTS4         | ShSTS16, 17, 18    | delta-6-protolludene  | 16.27          | 1376        |                | 1382                  |                                                                                                          |
|                | ShSTS12            | beta-cubebene         | 16.66          | 1389        | 1390 (HP-5)    |                       | doi:10.1016/j.jep.2006.04.018                                                                            |
| CpSTS12, 14    |                    | beta-elemene          | 16.68          | 1389        | 1392 (HP-5)    |                       | doi:10.1016/j.jep.2006.04.018                                                                            |
|                | ShSTS1             | alpha-barbatene       | 17.20          | 1406        |                | 1414                  |                                                                                                          |
| CpSTS17        | ShSTS13            | caryophyllene         | 17.46          | 1415        | 1419 (HP-5)    |                       | doi:10.1016/j.jep.2006.04.018                                                                            |
| CpSTS16        |                    | aristolene            | 17.48          | 1415        |                | 1423                  |                                                                                                          |
|                | ShSTS1             | beta-barbatene        | 18.22          | 1439        |                | 1445                  |                                                                                                          |
| CpSTS14        | ShSTS3             | beta-farnesene        | 18.67          | 1454        | 1454 (HP-5ms)  |                       | doi:10.2298/JSC100203125P                                                                                |
| CpSTS8         |                    | alloaromadendrene     | 18.77          | 1457        | 1461 (HP-5)    |                       | doi:10.1016/j.jep.2006.04.018                                                                            |
| CpSTS3, 5      |                    | gamma-murolene        | 19.28          | 1473        | 1477 (HP-5)    |                       | doi:10.1016/j.jep.2006.04.018                                                                            |
|                | ShSTS10            | germacrene D          | 19.33          | 1475        | 1481 (HP-5)    |                       | doi:10.1016/j.jep.2006.04.018                                                                            |
| CpSTS11        |                    | 9-alloaromadendrene   | 19.62          | 1484        |                |                       | See Figure S8                                                                                            |
| CpSTS9, 12, 13 |                    | ledene                | 19.82          | 1491        | 1495 (HP-5)    |                       | doi:10.1002/ffj.1812                                                                                     |
| CpSTS3, 5      |                    | alpha-murolene        | 20.01          | 1497        | 1499 (HP-5)    |                       | doi:10.1016/j.jep.2006.04.018                                                                            |
| CpSTS7, 14     | ShSTS3             | (E,E)-alpha-farnesene | 20.22          | 1504        | 1509 (HP-5)    |                       | doi:10.1016/j.jep.2006.04.018                                                                            |
| CpSTS18        | ShSTS5             | gamma-cadinene        | 20.57          | 1517        | 1524 (HP-5)    |                       | doi:10.1021/jf0303316                                                                                    |
| CpSTS2         | ShSTS7, 10, 11, 12 | delta-cadinene        | 20.68          | 1520        | 1524 (HP-5)    |                       | doi:10.1016/j.jep.2006.04.018                                                                            |
|                | ShSTS3             | nerolidol             | 21.83          | 1560        | 1565 (HP-5)    |                       | doi:10.1002/1099-1026(200007/08)15:4<245::AID-FFJ904>3.0.CO;2-V                                          |
| CpSTS9, 12     |                    | viridiflorol          | 22.64          | 1588        | 1590 (HP-5)    |                       | doi:10.1002/ffj.998                                                                                      |
|                | ShSTS8             | 1-epi-cubenol         | 23.65          | 1624        | 1623 (HP-5)    |                       | Custer, Y., GC Volatile Components Analysis of Different Parts of Litchi chinensis (Dissertation), 2009. |
| CpSTS3         |                    | delta-cadinol         | 24.19          | 1643        | 1645           |                       | doi:10.1016/j.jep.2004.02.010                                                                            |

**Table S3.** Sequences of (A) spliced introns and (B) nonspliced introns in AO-transformant. 5'-splice and 3'-splice site are shown in red bold character. Polypyrimidine tracts were shown in purple italic character. Branch sites with CTNAN and TTNAN are shown in blue or orange bold character with underline. Introns marked by \* were partially spliced in AO-transformant, thereby generating multiple cDNA sequences. Consensus sequences at the 5' splice site, the branch site, and the 3' splice site of (C) spliced introns and (D) nonspliced introns.

(A) spliced introns

| Region                                   | Sequence                                                                                                                                           | Intron length (nt) | Branch site position (nt) |
|------------------------------------------|----------------------------------------------------------------------------------------------------------------------------------------------------|--------------------|---------------------------|
| <b>Group I, Branch site motif; CTNAN</b> |                                                                                                                                                    |                    |                           |
| CpSTS1-intron1                           | TCAGT <b>AGT</b> <i>TCCTCATCGG</i> <u>TTTGCTTCGAGCTGC</u> <u>TCCGCTAAAC</u> <b>CCCTCGTAG</b> GC                                                    | 50                 | 37-41                     |
| CpSTS1-intron3                           | AAC <b>GTATGG</b> <i>CTCTCGTCTACTGTTTCTCTCGGCTTT</i> <u>CTAAC</u> GGCCAAAGGAAT <b>ATAG</b> GAC                                                     | 56                 | 37-41                     |
| CpSTS1-intron4                           | CAG <b>GTAGT</b> ATCCGAAAC <b>CTGGT</b> TAAAG <b>CTTCTTAACTCAT</b> GTAT <b>TCCTCAG</b> ATA                                                         | 52                 | 36-40                     |
| CpSTS2-intron1                           | TT <b>CGTAAGT</b> <i>CGTTCGCATCGATCAATGGATCGAGT</i> <u>ACTAAT</u> CCAGTTA <b>TGAAG</b> GTG                                                         | 52                 | 36-40                     |
| CpSTS2-intron2                           | GG <b>AGTAAGC</b> <i>ACTCTACAGTTGGTACTGAA</i> <u>CCCTCCC</u> <u>ACTGAT</u> GA <b>ACTGGCTTAG</b> ATT                                                | 53                 | 37-41                     |
| CpSTS2-intron3                           | AAT <b>GTAGC</b> <i>TTTTCTCTTTTTAGATATGTGGATCGAT</i> <u>CTAAC</u> GTGC <b>GTCTCAG</b> GAT                                                          | 54                 | 38-42                     |
| CpSTS2-intron4                           | AG <b>AGTAAGC</b> <i>AGACTCCCTCCCGCAG</i> <u>TTGCCTGTG</u> TAGATGAT <b>CTAAT</b> <u>GTTTTCTTCCGTTA</u> <b>CGCAG</b> TTG                            | 64                 | 40-44                     |
| CpSTS3-intron1                           | T <b>CTGTAAGT</b> <i>TTTCTTCCCTCTCCGTTA</i> TTTTTTTT <b>CTTCTG</b> CGAGC <b>CTAAT</b> GTACT <b>CTTCTT</b> CA <b>GGG</b> A                          | 69                 | 48-52                     |
| CpSTS3-intron2                           | CG <b>AGTATG</b> <i>CTTCCCGA</i> <u>TCCC</u> CATAGTCAA <b>ACTG</b> CTA <b>AGCG</b> <u>CTGAC</u> ATT <b>TCTTGTCTC</b> AGTTT                         | 60                 | 38-42                     |
| CpSTS3-intron3                           | CT <b>GGTAAGT</b> <i>TTTTACGCGATGCACCTCTGTCTTT</i> CA <b>TTCCG</b> CT <b>AGC</b> <u>CTAAT</u> GTACT <b>CTTCTT</b> CA <b>GGG</b> A                  | 59                 | 41-45                     |
| CpSTS3-intron4                           | AAT <b>GTACG</b> <i>TTTCA</i> <u>TTTCCG</u> ACT <b>CCCTCTT</b> GACA <b>ACTCTAC</b> <u>CTG</u> CTT <b>ACTAC</b> AGAC                                | 51                 | 36-40                     |
| CpSTS3-intron5                           | CG <b>GTATGT</b> <i>ACTCTTAACTCCTTGA</i> <u>CGTTGTCACTCAAG</u> <u>CTTAA</u> CCGACT <b>CCAA</b> CC <b>CAATAG</b> TTC                                | 61                 | 39-43                     |
| CpSTS4-intron1                           | TT <b>AGTGAGT</b> ACAA <b>TTTTAC</b> ATACGGT <b>ATTTGCT</b> CGGTG <b>CCGCGC</b> AGGGT <b>ACTGAT</b> A <b>TCTCCTTAG</b> ATT                         | 66                 | 52-56                     |
| CpSTS4-intron2                           | A <b>AGGTAAGT</b> CTGTTGG <b>ACCTCCTGTAACTCCTG</b> CT <b>CACTG</b> CT <b>GTCTCGG</b> GTAGAC                                                        | 52                 | 35-39                     |
| CpSTS4-intron3                           | AC <b>AGTATG</b> TATCA <b>TTTAACTG</b> TTCTAGCTGGCTGGCA <b>CTTAT</b> GTAGCA <b>ATTCGCG</b> ATAGGTT                                                 | 56                 | 35-39                     |
| CpSTS5-intron1                           | AG <b>AGTATG</b> <i>TTCTCTGTGACAAGTTCACTTCA</i> AA <b>ATCTA</b> CT <b>ATGCACTCC</b> CT <b>ATAG</b> TTA                                             | 54                 | 37-41                     |
| CpSTS5-intron3                           | A <b>ACGTATG</b> A <b>CCCTA</b> <u>TTTTCCG</u> CTGTTGG <b>CGCCT</b> ATGT <b>ACTGAC</b> ATCA <b>CTTGTCTC</b> AGGAC                                  | 63                 | 42-46                     |
| CpSTS6-intron1                           | TT <b>GGTACG</b> <i>CTCCGTTGTCTGCTCTACTGTTCCCTCGTA</i> <u>CTGAC</u> GGTT <b>CTAAG</b> GGC                                                          | 51                 | 37-41                     |
| CpSTS6-intron2                           | G <b>AGGTATG</b> TTCA <b>TTTTAT</b> CACTAGAATACG <b>TCAATGGAT</b> CT <b>TAACCA</b> TT <b>TAACAG</b> ATG                                            | 53                 | 38-42                     |
| CpSTS6-intron4                           | T <b>GAGTGA</b> GTGGC <b>TAA</b> <u>TTGTC</u> AGCATCACATAG <b>TCGCTT</b> <u>CTGAC</u> CAAGGTT <b>GATAG</b> ACA                                     | 55                 | 39-43                     |
| CpSTS6-intron5                           | G <b>AGTCA</b> GTCTATCGAAAG <b>CTT</b> CGGAAAGACATGGGA <b>CTTAA</b> CC <b>CAACAACAG</b> AGC                                                        | 51                 | 36-40                     |
| CpSTS7-intron1                           | TT <b>GTACAG</b> AAAA <b>ACTGAC</b> <u>TTT</u> GAGG <b>TATGGCTTCCAG</b> <u>CTGAC</u> CA <b>AA</b> CATT <b>GTAG</b> GTGTC                           | 55                 | 38-42                     |
| CpSTS7-intron2                           | A <b>AGGCAAGT</b> CTAG <b>CTTGTATGA</b> <u>TCCTGA</u> ATAAGG <b>GTCTGAT</b> GTGAT <b>ACTAG</b> AGC                                                 | 49                 | 35-39                     |
| CpSTS7-intron3                           | GC <b>AGTATG</b> TCAG <b>TTTTCA</b> TT <b>CTCT</b> ACCATGAC <b>CTGAAT</b> GT <b>CTCAG</b> GTT                                                      | 47                 | 34-38                     |
| CpSTS8-intron2                           | AG <b>AGTAA</b> GTGCTGAGAATTATCGGA <b>CCCCA</b> ACATCGGAAG <b>CTAAT</b> GCAATGAATA <b>ACTAG</b> GTT                                                | 63                 | 41-45                     |
| CpSTS8-intron3*                          | AAT <b>GTAA</b> GTACACATCACAGAATGATATCATGAT <b>TTGGCTGAC</b> <u>CTT</u> GTG <b>TGAAG</b> GC                                                        | 50                 | 35-39                     |
| CpSTS9-intron1                           | CT <b>AGTAA</b> GC <b>CCCTA</b> <u>TTTAC</u> AA <b>ACTG</b> TAAACAGG <b>CTT</b> AC <b>CACTGAC</b> CGTA <b>CTTCCAG</b> ACA                          | 57                 | 41-45                     |
| CpSTS9-intron2                           | AG <b>GTCA</b> GT <b>CT</b> AGTGGCA <b>CTT</b> CGAA <b>ATTTCT</b> AT <b>CTAAC</b> AG <b>TTTTCG</b> ATAGTTT                                         | 49                 | 34-38                     |
| CpSTS9-intron3                           | AAT <b>GTAA</b> GT <b>CA</b> AGGCTAGGAA <b>TTCT</b> CAAGGGCA <b>AA</b> T <b>AGCCTCAC</b> <u>TGTT</u> GTG <b>TAG</b> AGC                            | 54                 | 38-42                     |
| CpSTS10-intron1                          | CT <b>GGTCC</b> GT <b>GA</b> <u>CGCT</u> CAATAATACCA <b>TTTTCT</b> GA <b>AACTAAGC</b> <u>CTT</u> AG <b>TTT</b> AG <b>CTT</b> AGC                   | 53                 | 35-39                     |
| CpSTS10-intron2                          | T <b>GTAAGA</b> <u>CTTCC</u> CGAC <b>CA</b> <u>TGTT</u> CTAG <b>TTCCG</b> CTT <b>CAAACTAA</b> CCATT <b>A</b> CTATCA <b>CACAG</b> GAT               | 65                 | 43-47                     |
| CpSTS11-intron1                          | CT <b>GGTAA</b> AGATGTGATCA <b>CGTTC</b> GC <b>ATGCTG</b> CT <b>CTTCTT</b> CT <b>TAAGCT</b> CGCAGCAC                                               | 52                 | 37-41                     |
| CpSTS11-intron2                          | AG <b>AGTATG</b> AAATCACAT <b>ACGTC</b> AA <b>TTGG</b> ATCG <b>ACTAAT</b> CA <b>GGTACTGG</b> CG <b>CTCG</b> TT <b>CAG</b> CTT                      | 61                 | 35-39                     |
| CpSTS11-intron3                          | A <b>AGTGA</b> GT <b>CTCA</b> <u>TCCA</u> <u>TCTT</u> CTT <b>ACTA</b> AT <b>GTCTGAT</b> AG <b>CTTCACT</b> CGT <b>AG</b> GC                         | 52                 | 32-36                     |
| CpSTS11-intron4                          | C <b>AGGTGT</b> <u>TTTTCCA</u> <u>TCT</u> ACGTACCGATGAT <b>TCCT</b> ATT <b>CTGAC</b> TTGA <b>CA</b> AAAA <b>ATTAG</b> GTG                          | 56                 | 37-41                     |
| CpSTS12-intron1*                         | CT <b>AGTAA</b> GTAGAG <b>TC</b> GTACGGTCTG <b>ACTCG</b> GTGGAT <b>CTGAA</b> <u>CTTCC</u> AC <b>CTGCCAG</b> GTG                                    | 55                 | 37-41                     |
| CpSTS12-intron2                          | AG <b>GTAA</b> GC <b>CTT</b> CT <b>CCCTCA</b> <u>CGT</u> CCGAGT <b>GCTAGAC</b> <u>CTT</u> AG <b>ATTTA</b> <u>TTTTT</u> AG <b>CTT</b>               | 53                 | 35-39                     |
| CpSTS12-intron3                          | AAT <b>GTGAG</b> CGTGGAGAAAGG <b>TCTAA</b> <u>TTCTG</u> CG <b>TTGCTTAC</b> <u>CGTCCG</u> TC <b>GCAG</b> ATG                                        | 51                 | 35-39                     |
| CpSTS12-intron4                          | AG <b>AGTATG</b> TATCA <b>ATCGG</b> ACATAC <b>ACTGGCTTCTG</b> AT <b>CTGAT</b> GTG <b>CTGAG</b> CC <b>ACAG</b> ATG                                  | 55                 | 37-41                     |
| CpSTS13-intron1                          | TT <b>GTAA</b> AGAT <b>CTCCT</b> CTAATATA <b>CCCTA</b> <u>CGTTG</u> CCG <b>CAAG</b> AT <b>CTCA</b> TT <b>CGAA</b> ACT <b>ATAG</b> TAC              | 60                 | 44-48                     |
| CpSTS13-intron3                          | AAT <b>GTGAG</b> GC <b>CTCCT</b> CGATA <b>ACC</b> CGGAA <b>CTGAG</b> CGGAA <b>GTGTTT</b> CG <b>AGCA</b> <u>TAAT</u> <u>CCGTTCT</u> GGCAG           | 68                 | 51-55                     |
| CpSTS13-intron4                          | C <b>AGGCA</b> AGT <b>TTCT</b> CGA <b>TTCA</b> <u>TTTTCT</u> CCGCG <b>TTCTAATTTGAGG<b>CTCAG</b>AGATG</b>                                           | 51                 | 34-38                     |
| CpSTS14-intron1                          | A <b>AGGTG</b> AGTGGAA <b>TTGGT</b> GAAGTGGAGGGT <b>GTAG</b> AGGAAGAA <b>CCGAGG</b> <u>CTGAC</u> GGTGGTAT <b>CATAG</b> AA                          | 65                 | 48-52                     |
| CpSTS14-intron2*                         | CT <b>TTGG</b> CGTA <b>CTCTA</b> <u>TGCCT</u> CTAGCA <b>TTCA</b> <u>TCCT</u> AGTCTCGAC <b>CTGAT</b> GA <b>TTTCAA</b> <u>CCCT</u> TCAGCCT           | 63                 | 42-46                     |
| CpSTS15-intron1                          | G <b>AGGTAC</b> GTGGGTTGATGACAT <b>TTGG</b> AGT <b>CGGA</b> AGAT <b>CTCACTGAC</b> CTCGTCCG <b>TAGCAG</b> CTT                                       | 58                 | 39-43                     |
| CpSTS15-intron2                          | TT <b>GGTATGA</b> CGTCCAGTTGATGATCA <b>CACTG</b> ACTATCA <b>CTGAC</b> CTCTCACAT <b>TTTCTGTTAG</b> GCT                                              | 61                 | 38-42                     |
| CpSTS16-intron2                          | GG <b>AGTGG</b> GT <b>CTTCTG</b> TTTCA <b>TTCA</b> <u>TTTTT</u> CGTCC <b>AA</b> <u>CGT</u> CTG <b>TAAG</b> <u>CTGAA</u> ACGCAGTGG <b>CACAG</b> TTT | 62                 | 44-48                     |
| CpSTS16-intron3                          | A <b>ACGTAG</b> TGGACCTTGA <b>CAACTCCT</b> CGT <b>TAAG</b> TTGA <b>CTTAA</b> CC <b>CACTTCC</b> TA <b>TTTGTATCCAG</b> GAT                           | 64                 | 34-38                     |
| CpSTS16-intron4                          | TAT <b>GTAA</b> GT <b>CTCG</b> AC <b>CTGTTCA</b> <u>CCGGA</u> AG <b>CGTTCG</b> CGGTT <b>CTA</b> AA <b>CTTTTCTG</b> TATT <b>CATAG</b> ATG           | 65                 | 43-47                     |
| CpSTS18-intron1                          | AC <b>AGTATG</b> CTAATCAAG <b>CTTCTA</b> ATTA <b>ACGGT</b> CG <b>CTAAG</b> <u>TCGT</u> CA <b>CCGCTCAG</b> ATT                                      | 52                 | 44-48                     |
| CpSTS18-intron2                          | G <b>CTGTT</b> CGTGA <b>CTCTA</b> AA <b>TTCA</b> GT <b>CCCCA</b> <u>TTTGT</u> TT <b>CTGAC</b> CA <b>CCGCTGAG</b> AGC                               | 52                 | 38-42                     |
| CpSTS18-intron3                          | GG <b>AGTGA</b> GTAA <b>TTTTCT</b> CGGAAGAA <b>TTTCA</b> AGAA <b>CTCA</b> CA <b>TTTCA</b> ATTT <b>TAATTCAG</b> CTT                                 | 58                 | 36-40                     |
| CpSTS18-intron4                          | AC <b>GTGAG</b> CA <b>AAATC</b> ACGAGAT <b>TTTT</b> CGACGA <b>ATTGAG</b> ATA <b>CTGAC</b> TA <b>CTCCTCCCTGTTTCTG</b> AGGTT                         | 63                 | 39-43                     |
| CpSTS18-intron5                          | A <b>AGTACT</b> TCAGTCAA <b>TTCA</b> <u>TTCCG</u> TT <b>CTTCCGG<b>CTAAT</b><u>ACCC</u>CGA<b>TACAG</b>CCA</b>                                       | 53                 | 36-40                     |
| CpSTS18-intron6                          | A <b>ACGTAG</b> TTA <b>TTCCG</b> GACAT <b>CATTG</b> AA <b>CTTCCG</b> CTA <b>ATCAA</b> <u>CTCAA</u> AT <b>TATCTCAG</b> GC                           | 55                 | 41-45                     |
| CpSTS18-intron7                          | A <b>ACGTG</b> AGTATCCAT <b>TATTA</b> <u>TTCCG</u> TT <b>AAAA</b> AG <b>CTTTCTGAC</b> AGGCT <b>GTGCAG</b> AAG                                      | 52                 | 37-41                     |
| CpSTS18-intron8                          | CT <b>CGTA</b> AGTTA <b>CCGTA</b> <u>TCTT</u> CTCGTCCAGGG <b>CTCTTTA</b> <u>CTGAC</u> AT <b>TCGTGGTA</b> <u>TT</u> CA <b>GGG</b> T                 | 58                 | 39-43                     |
| ShSTS1-intron1                           | CT <b>TTG</b> AGT <b>TTCCG</b> AG <b>TTTGC</b> ATGACA <b>TC</b> TGG <b>TCTTGTG</b> ACT <b>GTAC</b> CTGAT <b>CTTTGTCTCGCAG</b> TCC                  | 62                 | 39-43                     |
| ShSTS1-intron2*                          | AT <b>CGTCC</b> GTGC <b>ACTTAC</b> CT <b>CTTCC</b> CAACGAGC <b>ATTCTCAT</b> CA <b>TTCTGTTT</b> ACAGGAG                                             | 55                 | 35-39                     |
| ShSTS3-intron1                           | G <b>AGGTAT</b> GT <b>CGTATGA</b> <u>TTGCTA</u> <u>TTGTC</u> ATA <b>CCCTTT</b> GTACT <b>CTCAT</b> ACTGA <b>CTCCAGTCTTCCGAG</b> CTG                 | 67                 | 41-45                     |
| ShSTS3-intron2                           | C <b>CTGTAC</b> GTGG <b>CTA</b> <u>CCCC</u> TT <b>CTCACT</b> GT <b>TACTC</b> CGTAT <b>CA</b> CGAGAA <b>CTGAC</b> TGAGCA <b>CTTCC</b> CATTATT       | 77                 | 47-51                     |
| ShSTS3-intron4                           | C <b>AGGTAA</b> GC <b>AA</b> CA <b>CA</b> AG <b>AACTGAA</b> <u>CGCT</u> ATGAT <b>AGCT</b> ACTAG <b>CTGAT</b> CA <b>CCGTC</b> AA <b>ACAGG</b>       | 54                 | 38-42                     |
| ShSTS3-intron5                           | AT <b>GGTGA</b> GT <b>CA</b> <u>TCGTA</u> <u>TCC</u> ATTGATGATGA <b>TCCA</b> <u>TA</u> ACT <b>GA</b> CA <b>TTGCTTTTCGAGAGG</b>                     | 52                 | 34-38                     |
| ShSTS4-intron1                           | A <b>AGGTAT</b> GT <b>TCATA</b> <u>CTCGT</u> ATTGGCTGTG <b>TTTTG</b> <u>CTTAC</u> CGC <b>ACTGCTCAG</b> AAC                                         | 54                 | 37-41                     |
| ShSTS4-intron2                           | GG <b>GTAC</b> GTATACAA <b>TTGTCTCTGCTTCT</b> ACAA <b>TTCTTAA</b> CC <b>CAAGCAG</b> ACTAGAGT                                                       | 51                 | 36-40                     |
| ShSTS4-intron3                           | CG <b>GTATG</b> CA <b>CTTCT</b> CTGATTGACTGCAG <b>CTA</b> <u>CTCG</u> AG <b>CTGAC</b> GC <b>CAATG</b> CCG <b>CTAC</b> TAGGCT                       | 61                 | 39-43                     |
| ShSTS4-intron6                           | AT <b>GGTCA</b> GTCTA <b>TGCG</b> TTTACTACCGA <b>TTCTG</b> CTACG <b>TTGCTAATA</b> <u>TCGCTA</u> <u>TCCG</u> TTCTAGTAT                              | 60                 | 37-41                     |
| ShSTS4-intron7                           | AC <b>GTAA</b> GA <b>ACCA</b> ATATA <b>AA</b> GA <b>CCGTC</b> CGG <b>CAAA</b> TT <b>CTAAT</b> AGCTAT <b>CTT</b> CA <b>GCCTT</b>                    | 53                 | 35-39                     |
| ShSTS4-intron9                           | G <b>AGTAA</b> GC <b>AAAA</b> ACTACTATGGTA <b>TCC</b> AC <b>ACTCTG</b> ACAT <b>CTAAC</b> AG <b>TTGTTTT</b> ACAGAGC                                 | 59                 | 42-46                     |
| ShSTS4-intron10                          | CG <b>GTAG</b> GT <b>GCTCG</b> GT <b>TTTCTTCT</b> ACGCAAT <b>TTCTAAT</b> ACTGG <b>TACAG</b> TGC                                                    | 53                 | 38-42                     |
| ShSTS4-intron11                          | A <b>AGTATG</b> <u>CTTTTTT</u> CT <b>TTTCT</b> ATTGAGC <b>ATTGAG</b> ACC <b>CTAG</b> CT <b>AGC</b> AG <b>CACTATTTAG</b> CTA                        | 63                 | 45-49                     |
| ShSTS4-intron12                          | GG <b>CGTAC</b> GT <b>TACTACT</b> CA <b>CTTCTT</b> ATGGCAG <b>ACC</b> ACT <b>CTGAC</b> CTGAGAT <b>GTGTT</b> CA <b>GTCT</b>                         | 56                 | 39-43                     |
| ShSTS4-intron13                          | CT <b>GGTAC</b> CGAG <b>TTCC</b> CT <b>CCG</b> AG <b>TTTTG</b> TTGAT <b>TTCTCA</b> CC <b>TTTTT</b> TT <b>CCGAG</b> ACC                             | 56                 | 37-41                     |
| ShSTS4-intron14                          | A <b>AGTCA</b> GT <b>GTCTT</b> CA <b>CTTCA</b> <u>CTT</u> CT <b>CTCTCT</b> CC <b>CACTA</b> <u>CTGAT</u> TGAT <b>TTCCG</b> CT <b>GTCTCTAG</b> CTT   | 63                 | 39-43                     |
| ShSTS5-intron4                           | A <b>AGTGC</b> AT <b>ACTAA</b> <u>CTT</u> AT <b>TTG</b> CA <b>AA</b> ACTAC <b>CTCAC</b> CTGACC <b>ACTAG</b> GTT                                    | 48                 | 33-37                     |
| ShSTS5-intron5                           | A <b>AGTCC</b> AG <b>TCGTT</b> CG <b>TTCTCA</b> <u>CTTT</u> AGTAT <b>CTA</b> AT <b>CTGAG</b> A <b>TCCAG</b> AT <b>TCTAG</b> CCA                    | 54                 | 37-41                     |
| ShSTS5-intron6                           | A <b>ACGTAC</b> GT <b>TCCTG</b> CA <b>ACCA</b> <u>TCT</u> CGAAGGAT <b>ACCAT</b> <u>CTCA</u> CTG <b>TAC</b> CGG <b>CCGTG</b> AT <b>TAG</b> GAT      | 58                 | 36-40                     |
| ShSTS5-intron7                           | AAT <b>GTCTG</b> <u>TTTTCTG</u> TT <b>TTAT</b> TA <b>CCCC</b> CGG <b>GTGGT</b> GT <b>ACTCAT</b> CGTCA <b>AA</b> TAGAA <b>G</b>                     | 52                 | 38-42                     |

Table S3. Continued.

|                                    |                                                                                                                                                                                                                                |       |         |
|------------------------------------|--------------------------------------------------------------------------------------------------------------------------------------------------------------------------------------------------------------------------------|-------|---------|
| ShSTS5-intron8                     | CTAGTATGTCGCCCTTACCAGTAAACAGCCCATTTGTGCGCAGCACTCATCTTTGAAAGGAT                                                                                                                                                                 | 57    | 41-45   |
| ShSTS7-intron1                     | GTCGTGCGTGCAATTTATTATTAGCCCTCTATTCCTAGTCTCTGAGTCATCATACTTGGTTGCATCGACAAC<br>TGTA <b>CTGAT</b> GACTGCCCTTCCATTTCTAGGTT                                                                                                          | 99    | 75-79   |
| ShSTS7-intron2                     | AATGTAGTAAATCCAA <b>TGCCATCGTATA</b> CCCGGCA <b>TCCTCTTC</b> AGG <b>TCTGCA</b> AGTCAAGGAGCATAG <b>CTGA</b><br><b>CCCACTTCGTCCAG</b> GAT                                                                                        | 84    | 65-69   |
| ShSTS7-intron3                     | ACGGTCGGTTCCTCCATGGCGTGGTTACGTGATCGAAG <b>CTGAT</b> GCCA <b>TTGCCTGCAG</b> GTA                                                                                                                                                 | 58    | 40-44   |
| ShSTS8-intron1                     | AGAGTACGTTTCACTCAGA <b>TCCGCG</b> CAAACCTTGATAGGCT <b>ATTCTGTCCCGATCGA</b> <b>CTGACGCC</b> TA <b>CCTGTT</b><br><b>CTGTCTAGCCT</b>                                                                                              | 77    | 53-57   |
| ShSTS8-intron2                     | CCCGTAAGTCTGGCGGTTACCGTCCAACCCGACGACCTGATAT <b>CTGAT</b> CTTCA <b>CAAAG</b> ATA                                                                                                                                                | 55    | 41-45   |
| ShSTS8-intron3                     | AATGTAAAGCCTTGCCTGCTGTA <b>TGCCATGGCTCACA</b> CTCATCG <b>CTAAT</b> TGT <b>CA</b> CGCT <b>TAACAG</b> GAT                                                                                                                        | 60    | 42-46   |
| ShSTS8-intron4                     | TAG <b>GTAAAG</b> ATTGACAGCCACAGCTCTGGGG <b>TCTCCTGCCCTTAA</b> CA <b>TTTGTGGCTTTGATCGTTACAG</b><br>GTA                                                                                                                         | 69    | 41-45   |
| ShSTS10-intron1*                   | GGAGT <b>GTAGC</b> ACTA <b>TTTTGCTCCCG</b> ATTGGAG <b>CTGTCA</b> TT <b>TAAG</b> CGTA <b>TCCTTCTGAC</b> CCTCTACTATTGGTA<br>TTATT <b>AAAAG</b> CTT                                                                               | 80    | 51-55   |
| ShSTS10-intron2*                   | AACGT <b>AGT</b> AGTTATA <b>TCTCTCCGG</b> ATCTGGCGA <b>CTAAT</b> TGATGG <b>TTCCA</b> TT <b>CGATAG</b> GAT                                                                                                                      | 56    | 33-37   |
| ShSTS11-intron1*                   | ACAGT <b>AAAGC</b> ACTAG <b>CGTGT</b> TTTTTTTT <b>TCGCTT</b> CT <b>TAAG</b> CTCAGGG <b>CGCA</b> CTGACG <b>CTAAC</b> ATGC <b>ACTTTGAC</b><br>TTTTGG <b>CTCAA</b> CTCATTAT <b>CCGAG</b> ATT                                      | 94    | 76-80   |
| ShSTS11-intron2                    | AATGTAGTGAACACACACACA <b>CCTCACTCCCTCCCTCTCTCT</b> ATCAATCTTAGGCACAATGGATGT<br>CGGGG <b>CTGAC</b> ATA <b>TGTCATA</b> ACTTGGT <b>CGGAAG</b> GAC                                                                                 | 102   | 75-79   |
| ShSTS12-intron2                    | AATGTAAATA <b>TGTTCCCTCC</b> CGGTTA <b>TCTCA</b> TT <b>CA</b> GGTGTGACGGTTA <b>CCCAGGCG</b> CAATCTCA <b>CTGA</b><br><b>CGCTCTCTATTGAG</b> AT                                                                                   | 85    | 66-70   |
| ShSTS12-intron3                    | GAGGTGGGTAG <b>CTGCT</b> TCGACAAATGCGTAGTTG <b>CTCATA</b> TCCTTT <b>TTGTTA</b> GATA                                                                                                                                            | 52    | 33-37   |
| ShSTS13-intron2*                   | GAAGTAAAGGAGATCA <b>TTTATCCCTCGGTA</b> CTTACA <b>CCCGTAGCTGA</b> TTGTTATCATG <b>CCAAG</b> CTC                                                                                                                                  | 60    | 40-44   |
| ShSTS13-intron3*                   | AAGGTGAACATTAACAGCAGTGGTCAAACGG <b>CCTCGGTA</b> CT <b>CA</b> CT <b>CCCGT</b> GATT <b>ATCAG</b> AAC                                                                                                                             | 59    | 37-41   |
| ShSTS13-intron4                    | CCAGT <b>CA</b> GTTTCAAAG <b>CTTCTCTG</b> ACGG <b>TTGCT</b> TAGCA <b>CTGAC</b> TCACCA <b>GA</b> AAAT <b>TCGCA</b> TAGGTT                                                                                                       | 64    | 39-43   |
| ShSTS13-intron5                    | AACGT <b>AGT</b> TTGAACCAACA <b>CCTCGTTTTCTGCT</b> CTCACATCG <b>CTGAC</b> AGTT <b>CA</b> GGCAGGAC                                                                                                                              | 53    | 38-42   |
| ShSTS16-intron1                    | TCAGTAAAGT <b>CTTTCATA</b> AAAT <b>TTCCG</b> CAG <b>CTTATCTTCG</b> CTT <b>ATTTGCTTAC</b> GTCT <b>ACGTTTTGTCGCGCT</b><br><b>TTTGCTCAG</b> ACC                                                                                   | 80    | 45-49   |
| ShSTS16-intron3                    | GCAGTATG <b>CTCCCTA</b> TT <b>CTTCTCTCCGCGT</b> CTCCAGTTA <b>TCCTGTCTCTCTCTCTCT</b> GTATTATTA <b>TC</b><br><b>TTTTGTTTCAT</b> GATCCCGGCC <b>TGCTCATCACTCAT</b> TTTTATT <b>TTAG</b> ATT                                         | 122   | 106-110 |
| ShSTS16-intron4                    | AACGTAAAGTAA <b>CAATGCTG</b> AGATA <b>CTCTGCACTCACCG</b> TG <b>CTAAC</b> CCCGATG <b>TTCTTGCTTAATAG</b> GAC<br>TCAGTAAAGT <b>CTCTTTGGG</b> CCGCA <b>CTAGTA</b> ATCAAGCATG <b>CTCAC</b> CAGTCA <b>ACTCGCTCGGTAAT</b> AT<br>AGACC | 62    | 38-42   |
| ShSTS17-intron1                    | ACAGT <b>AGT</b> GTAGCCTGCAACAGTCCACATGATATAT <b>TTCC</b> CAATGGTCTGG <b>CTCAC</b> TGAGAAG <b>AAACAG</b><br>GTA                                                                                                                | 71    | 42-46   |
| ShSTS17-intron3                    | TCAGT <b>AGT</b> TTACAGTCAA <b>TTCC</b> TATGTCGGAGACATCGATGGGCC <b>CTCAC</b> CATAG <b>TCTACT</b> ATAGACT                                                                                                                       | 68    | 52-56   |
| ShSTS18-intron1*                   | ACAGT <b>GCCTT</b> CCACTGCAAA <b>CCACACCA</b> AGAAAGTACT <b>CTGAC</b> ACCGCAGG <b>GACAG</b> GTT                                                                                                                                | 65    | 46-50   |
| ShSTS18-intron3                    | AACGTACCTTAATCTGACC <b>ACTTCG</b> CAGAGACAG <b>CTCAT</b> TCAGATA <b>CTCTG</b> ACCG <b>CTACAG</b> GAC                                                                                                                           | 54    | 37-41   |
| ShSTS18-intron4                    | ACAGT <b>ACCTCAA</b> TT <b>TTCCCTTTG</b> TATTATGTCAGAA <b>ACTCAT</b> TGA <b>ACTTTG</b> AAATTAATGGAA <b>AAATAG</b><br>ATT                                                                                                       | 58    | 32-36   |
| Ple1-intron 1                      | CAGGTATGG <b>TTCCG</b> ACATG <b>CTGCT</b> ATCGA <b>TTTCTGTCTGAC</b> ACG <b>TTCTACT</b> AGGCC                                                                                                                                   | 69    | 36-40   |
| Ple1-intron 2                      | ACTGT <b>AGT</b> ACAG <b>CGTCT</b> CTATCAA <b>CGGGCTGA</b> AGACCGACATCAGTT <b>ATCAG</b> GTC                                                                                                                                    | 50    | 34-38   |
| Ple1-intron 3                      | GAAGTATGAT <b>TTCCAGGCAC</b> CTTCTCATACCGCATAGAC <b>CTAATCTCTTTGAT</b> AGTCT                                                                                                                                                   | 54    | 30-34   |
| Ple1-intron 4                      | ATAGTAAAGCAGTA <b>TCTTCTA</b> ACT <b>CTGACTT</b> CACTTACG <b>CTAAT</b> CGGTCTA <b>TCCTTAG</b> AAA                                                                                                                              | 55    | 37-41   |
| Ple1-intron 5                      | CCGGTATGCTATCTA <b>TCCCTCG</b> AGCAGAGGACTTAGATGGG <b>CTCATG</b> TCTGTTA <b>TTGAT</b> AGCTG                                                                                                                                    | 56    | 39-43   |
| Ple1-intron 7                      | AAGGCT <b>CGG</b> CAGAAGGTC <b>CAAAAA</b> CG <b>TTCTT</b> CAAA <b>CCCGT</b> AACTCATG <b>CTCAC</b> CTT <b>CTTTA</b> GAAT                                                                                                        | 64    | 48-52   |
| Ple1-intron 9                      | ATCGT <b>AGT</b> AG <b>TTCCG</b> CGATGAACATTCGG <b>CTT</b> AG <b>CTAAA</b> CC <b>CTGTCTAC</b> AGACG                                                                                                                            | 50    | 34-38   |
| Ple1-intron 10                     | TCAGTAA <b>GT</b> CG <b>CCCAA</b> AGCTCA <b>TCTT</b> GTATGGTGG <b>CTGAC</b> ATA <b>CTCTCT</b> AGGCT                                                                                                                            | 48    | 33-37   |
| Ple1-intron 11                     | ACG <b>GTAG</b> TTGTAACCATCTTGGATTCGAAAGGACTGCC <b>CTGAG</b> CCCTA <b>TTCCA</b> TACAGTTG                                                                                                                                       | 57    | 39-43   |
| Ple1-intron 12                     | ACAGT <b>AGT</b> CA <b>CAAG</b> CC <b>CTCTG</b> TATCCGG <b>CTTTG</b> TC <b>CAAA</b> CT <b>AGC</b> CT <b>GTGG</b> CT <b>GTGAA</b> AT                                                                                            | 51    | 37-41   |
| Ple1-intron 13                     | AAGGTACGGTA <b>TTTGAT</b> CACCATC <b>ACTAG</b> CC <b>CTCTGAC</b> AAAGAC <b>CTTACAG</b> GAA                                                                                                                                     | 52    | 33-37   |
| Ple1-intron 14                     | TGCGTTAT <b>TTCTCTTTT</b> CCACCGTACGGTACGAGTAA <b>CTGAC</b> TTATA <b>TTCTG</b> CAGCTA                                                                                                                                          | 47-51 | 42-46   |
| Ple1-intron 15                     | GAGGTT <b>GTGGA</b> TT <b>TTGTCG</b> AGATGATGCATTTGGGAGTGA <b>CTCAG</b> TCATCG <b>TTG</b> CAGGTA                                                                                                                               | 55    | 39-43   |
| Ple1-intron 16                     | GAGGTA <b>AT</b> TG <b>ACTTTG</b> TTCTT <b>CTG</b> TAGAATGATAGAG <b>CTAAC</b> CAAA <b>CTTAG</b> TAC                                                                                                                            | 50    | 36-40   |
| Ple1-intron 17                     | TTT <b>GTAA</b> GT <b>CTGCTCTT</b> CGA <b>CTTCTG</b> TTGGCATA <b>CTCAG</b> AA <b>CTTGG</b> AA <b>ATAG</b> ATG                                                                                                                  | 51    | 35-39   |
| Ple1-intron 18                     | CAAGT <b>AGT</b> AG <b>CCCTCTG</b> CTT <b>GTAA</b> TCGTAGAAC <b>CTAC</b> AG <b>CTCTCCG</b> CAGAGG                                                                                                                              | 51    | 37-41   |
| Ple1-intron 19                     | AAGGTAAATCTTACTATGG <b>CTTAA</b> TGGCAATGATAG <b>CTCATG</b> TTCTGATAG <b>CCG</b>                                                                                                                                               | 51    | 37-41   |
| Ple1-intron 20                     | CCCGT <b>AGT</b> GTATACAA <b>CCTGT</b> ATCAGAA <b>TTTTCTCAA</b> TT <b>GTCTAC</b> AGAGGTT                                                                                                                                       | 52    | 35-39   |
| Ple1-intron 21                     | GCAGTATG <b>TTCCCTG</b> CACTCAA <b>CTCG</b> CCGCTT <b>AGCTAAT</b> TTGTTAC <b>CTCAG</b> ATT                                                                                                                                     | 52    | 37-41   |
| Ple1-intron 22                     | TCT <b>GTAA</b> GTAGTGGAAA <b>ACTATG</b> GAAGCAATAGG <b>TTCTCATG</b> TT <b>CCCTAG</b> CTC                                                                                                                                      | 49    | 36-40   |
| Ple1-intron 23                     | CCTGT <b>AGT</b> TCGACCTA <b>TCTTCC</b> CAAT <b>ACGCGT</b> TTCT <b>TA</b> CT <b>GTAC</b> TTACCGAC <b>GATAG</b> AAC                                                                                                             | 57    | 40-44   |
| Ple1-intron 24                     | ATCGTACGTA <b>AACTCT</b> CTG <b>GGG</b> ACAAGTTGATGAA <b>ATCTAAC</b> CA <b>ACTTCCAG</b> GAA                                                                                                                                    | 54    | 38-42   |
| Ple1-intron 25                     | GAGGTGGG <b>TT</b> CTACGGAAGACA <b>TCTGT</b> CAGTTCTATTGTT <b>CTCA</b> ATCGGGTGG <b>CTTAG</b> GTT                                                                                                                              | 56    | 39-43   |
| Ple1-intron 26                     | TCTGT <b>AGT</b> TCAGAA <b>CGTGG</b> TATATTATCGCCATTGACGGAG <b>CTGAC</b> GGG <b>CTCCAC</b> AGTAT                                                                                                                               | 58    | 42-46   |
| Ple1-intron 27                     | TCTGT <b>AGT</b> TGACCA <b>CCTCG</b> CC <b>ATTC</b> GGAA <b>CGTTGAA</b> CT <b>GTAT</b> TAGTG <b>TCTAG</b> GGG                                                                                                                  | 51    | 37-41   |
| Ple1-intron 28                     | CTGGTACG <b>TTCTG</b> ATC <b>CAAA</b> CTCGATTGAGTGG <b>CTTAC</b> CGGACTAGAGAA <b>CCCTAC</b> AGAAC                                                                                                                              | 58    | 35-39   |
| Ple1-intron 29                     | CGTGT <b>AGT</b> GTATCGTG <b>TTCT</b> CACTCGGTAC <b>CTGAT</b> CA <b>TTTAC</b> GTCTG <b>CTCAG</b> AGA                                                                                                                           | 52    | 31-35   |
| Ple1-intron 30                     | ACTGTACGTTATGTT <b>CTAC</b> GTACGGTGGAA <b>AAATTTGCTGAT</b> ATGA <b>ACTGGCACAG</b> GGT                                                                                                                                         | 57    | 39-43   |
| Ple1-intron 31                     | TGGGT <b>CGCT</b> ATAG <b>TGCG</b> TTATCA <b>TTTCT</b> CAAGACCG <b>CCCGAGGCTAAC</b> ATCA <b>CTTTA</b> TT <b>CTGACA</b><br>GGTT                                                                                                 | 70    | 45-49   |
| Ple1-intron 32                     | TGGGTATG <b>TTCTT</b> CCAGGG <b>TCCATTCG</b> CCGA <b>TTCA</b> GT <b>CTCAT</b> T <b>CTGCG</b> TT <b>CTAG</b> TCG                                                                                                                | 52    | 36-40   |
| Ple1-intron 33                     | TCGGTACG <b>CTCTCT</b> CCAGCA <b>CTCG</b> ATATATCA <b>AACTCAC</b> AAACGA <b>CTGTTAG</b> TTTC                                                                                                                                   | 55    | 36-40   |
| Ple1-intron 34                     | ATTGTAGCA <b>TTCTG</b> CTGGGATAATA <b>TTTCT</b> ACTCGAGAT <b>CTGAC</b> CGCA <b>CTTGAT</b> AGAA                                                                                                                                 | 55    | 40-44   |
| Ple1-intron 35                     | AGAGTGGG <b>TTTTCC</b> ACCAG <b>TTCC</b> CTG <b>TA</b> TT <b>CA</b> CGGACATAT <b>CTTAC</b> CGA <b>CCCC</b> TT <b>ACTAG</b> AAA                                                                                                 | 59    | 41-45   |
| Ple1-intron 36                     | GTGGTAT <b>CTCCAGG</b> CAA <b>TGCG</b> TTGG <b>TCTC</b> GATA <b>TTAACTGAC</b> AGCTGGGG <b>TTCTCCTTAG</b> AAA                                                                                                                   | 60    | 37-41   |
| Group II, Branch site motif; TTNAN |                                                                                                                                                                                                                                |       |         |
| CpSTS1-intron2                     | CCAGTAA <b>GTCAA</b> CT <b>TTGCT</b> ATACTGGGGGAA <b>ATGAA</b> T <b>GTAG</b> GGGTT <b>CAAAG</b> ATT                                                                                                                            | 50    | 36-40   |
| CpSTS4-intron4                     | AATGT <b>AGT</b> CGA <b>TCAT</b> CCGATATGGGGATTGCGAAAGATA <b>TTTAA</b> CAAAGT <b>GTG</b> CAGGAT                                                                                                                                | 54    | 38-42   |
| CpSTS9-intron4                     | CGAGTAA <b>GTCAA</b> CT <b>TTA</b> CT <b>CTC</b> CTATCGAGGAAGGTA <b>TTAAC</b> CC <b>CTGGA</b> ACAAGTTG                                                                                                                         | 51    | 35-39   |
| ShSTS4-intron8                     | CCGGTAA <b>AGTCTTCCG</b> CC <b>CAATTT</b> CAATTGA <b>TGCTGTCTG</b> TA <b>TTAA</b> ATCA <b>CTCTCAG</b> ACC                                                                                                                      | 57    | 40-44   |
| ShSTS5-intron1*                    | AA <b>GGTCTC</b> GCACGGTGA <b>TTTTT</b> GATTATGACACA <b>ATTGAC</b> ACCA <b>CTTACTT</b> CACAGTTT                                                                                                                                | 55    | 35-39   |
| ShSTS5-intron2                     | TCGGT <b>AGT</b> T <b>CTGT</b> GACCA <b>CTGGA</b> AGGCTGG <b>TCTCGT</b> CG <b>TAAC</b> CG <b>CTGCT</b> CTATAGACC                                                                                                               | 57    | 39-43   |
| ShSTS10-intron3                    | GAGGT <b>AGT</b> GAT <b>TTTG</b> CCA <b>CTTTC</b> GTG <b>TG</b> AGACTGCA <b>ATTTGAC</b> G <b>TTTCTG</b> TTG <b>TG</b> CTAGATA                                                                                                  | 64    | 42-46   |
| ShSTS13-intron1                    | GAGGT <b>CGT</b> CCA <b>CTGCC</b> ACATATTA <b>CCGCG</b> AAACAGCTCTG <b>TTAAC</b> ATTT <b>CACT</b> GTGGAC <b>GATAG</b> GAC                                                                                                      | 64    | 40-44   |
| ShSTS17-intron2                    | AAC <b>GTAG</b> GTGATTTTCTTTT <b>CA</b> TTGTTAGGCTTACTTCTG <b>TGAA</b> GATTAAATTTGGGAT <b>TTAAG</b> AGG                                                                                                                        | 68    | 44-48   |
| ShSTS17-intron4                    | AATGTAA <b>GT</b> GATATTGCGCCTTACCGTCCG <b>TAGT</b> CTG <b>TA</b> AAATATTCTGCA <b>AAAG</b> ATT                                                                                                                                 | 59    | 41-45   |
| ShSTS18-intron2                    | AAGGT <b>CAGTAA</b> CT <b>CTG</b> CTCGG <b>TTTGC</b> AACGACGAGAGAT <b>TTAAA</b> GGGT <b>GTG</b> TAGAAC                                                                                                                         | 55    | 41-45   |
| Ple1-intron 8                      | ATGGTATG <b>TTGCT</b> TGGA <b>TCTG</b> CTG <b>TA</b> AAAT <b>TTG</b> CT <b>GTG</b> CTAGGGC                                                                                                                                     | 47    | 33-37   |
| Ple1-intron 9                      | TGGTAA <b>GT</b> GATAGTCA <b>ATCA</b> TTGATGCTGCTG <b>CTAAA</b> TT <b>AA</b> ACTA <b>CTTTCAG</b> AAC                                                                                                                           | 52    | 36-40   |
| Ple1-intron 10                     | GAG <b>TTGGT</b> TT <b>CTG</b> ACGGTATG <b>CTTGT</b> CTGGACC <b>AAA</b> TT <b>AA</b> CA <b>CTG</b> CTA <b>TTTCTCAG</b> ACC                                                                                                     | 56    | 37-41   |

Table S3. Continued.

| Group III, Branch site motif; not determined |                                                                                   |    |       |
|----------------------------------------------|-----------------------------------------------------------------------------------|----|-------|
| CpSTS6-intron3                               | ACAGTATGTTTTTCGTCCTCATTAAATGATCGGGATGAAAGTTAATTTGACAACGTAGGTT                     | 56 | 38-42 |
| ShSTS11-intron3                              | CAGGTAAGCTGAAGGATTGCTGAATCTAAGCATATGAAGTTGACGATTTCTGGTATATGTAGGTA                 | 59 | -     |
| ShSTS16-intron2*                             | AACGTATGATTCGCTGTCTACCCCTCGGTGATTATACAGTAGGACACTAGTATTAACCAGATTTTTCTCCC<br>CAGATG | 73 | -     |
| Ple4-intron 1                                | GATGTAAGCACCTTCGCTCTGCCACTTCATCACTGTCGCAATGACTTGGCAAAAATATAGGAA                   | 58 | -     |

(B) nonspliced introns

| Region                                       | Sequence                                                                                                                                           | Intron length (nt) | Branch site position (nt) |
|----------------------------------------------|----------------------------------------------------------------------------------------------------------------------------------------------------|--------------------|---------------------------|
| Group I, Branch site motif; CTNAN            |                                                                                                                                                    |                    |                           |
| CpSTS8-intron1                               | AATGTGCGTTCCTTTCCAATGGTACCATGAACATACTGAACTGCGTACTTCAAGGGC                                                                                          | 53                 | 34-38                     |
| CpSTS13-intron2                              | AGAGTAAAGTTGGACACAACA TCTCTCAGATTAGACTGGTTACACTGAAACCTATATTACTTGCAGTTT<br>TCGTGACCCCTGCCAAAC TGCACATGATGCA TTGTGTACGCCACTGAGACGCCCGTTTGTGTGTGACAGA | 62                 | 41-45                     |
| ShSTS3-intron3                               | GT                                                                                                                                                 | 68                 | 41-45                     |
| ShSTS4-intron4                               | GGGGTGTGTGG TTTTTCGGTA TCTATAGTCTTTTCAAGCCTTCTGAAATATCATATCTCTTCTAGCCC                                                                             | 62                 | 40-44                     |
| Ple1-intron 6                                | TCGGTATGTGTTTCGCA TCTTTTCAACATGGAAGATCTCAGTATCTCCCTATTTAGCTG                                                                                       | 54                 | 36-40                     |
| Ple5-intron 4                                | TGGGCTGTCTCATGCTCTGCACGGTTCAAACA TTTCTGATACGCCACTTTTTTAGATA                                                                                        | 55                 | 35-39                     |
| Group II, Branch site motif; TTNAN           |                                                                                                                                                    |                    |                           |
| CpSTS5-intron2                               | AATGTGCGTTCCTTCGCTTCTACCCCTTTTCGACCTCACCCGTTCAITTCATTTCTTAACAGACG                                                                                  | 60                 | 41-45                     |
| CpSTS7-intron4                               | AATGTGCGTTCCTTAGGGAGTCAGGCCCA TCTCGCCAATCCGTTGATA TCCCTTTTGACAGGAT                                                                                 | 61                 | 42-46                     |
| CpSTS8-intron4                               | CAGGTAAGTAG TCCAGGTTCCAGGCTTCAAGTATACTTGATCAATTTTATGATGGTAGATG                                                                                     | 57                 | 36-40                     |
| CpSTS17-intron1                              | AAGGTGCTGTGATTCATACCCCTTTTATTCAGTCAATGACGAGAACCAAAGGCT                                                                                             | 50                 | 34-38                     |
| ShSTS3-intron6                               | CATGTATGTTTGAACCCA TCTACTCCCGCTCTCTGCTTG TTAGTGCCTCTTCTGCTGTAAGTCT                                                                                 | 64                 | 38-42                     |
| ShSTS12-intron1                              | GGAGTGAGTAAATCTAACAATAA CCTTCTCCTAGAGACTTCGGTGACA CTGTAATTCATCTTGCCCTCATCC<br>ACA TGTGCCACCCACAGCTT                                                | 87                 | 64-68                     |
| Group III, Branch site motif; not determined |                                                                                                                                                    |                    |                           |
| ShSTS5-intron3                               | GAGGTTGCTGCTTTCGTTGCTATGTCATATGTACCACGTAAGATCGGTATATCACTTCAGCCT                                                                                    | 59                 | 37-41                     |
| CpSTS16-intron1                              | CTGGTTCTCGCATCTGCTGTCTGTTCTTTGTAATGGACTTCGAACAGCAT                                                                                                 | 49                 | 32-36                     |
| CpSTS17-intron2                              | CTGGTGTCTCTTCTGCTCTCTGTTTCTATCGACCAACCA TGTCTTTGTCCTCAACAGGTT                                                                                      | 59                 | -                         |
| ShSTS4-intron5                               | GGAGTACGTCCATACGTTCTTCATATACTTTGACTTCTCGATACCCCTTGGCCGAACAAACAGTTC                                                                                 | 61                 | -                         |

(C) spliced introns

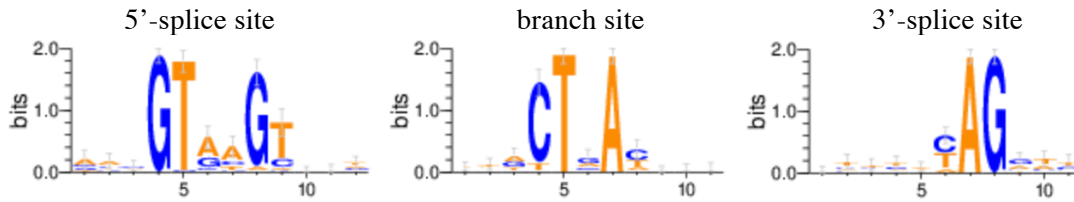

(D) nonspliced introns

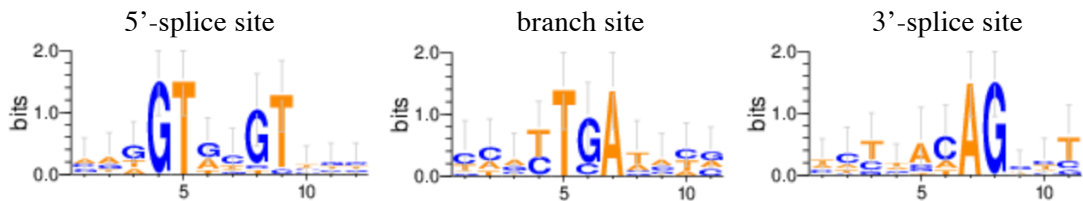



**Table S4.** Summary of amino acid sequence identities of STSs in the same clades. (A) clade I; (B) clade II; and (C) clade III.

(A) clade I

|          | Omp1 | Omp2 | Omp3 | Cop2 | Cop3 | CpSTS<br>3 | CpSTS<br>5 | ShSTS<br>7 | ShSTS<br>6 | PpSTS<br>-01 | PpSTS<br>-03 | PpSTS<br>-06 |
|----------|------|------|------|------|------|------------|------------|------------|------------|--------------|--------------|--------------|
| Omp1     | -    | 56%  | 42%  | 44%  | 43%  | 41%        | 55%        | 46%        | 39%        | 50%          | 41%          | 40%          |
| Omp2     |      | -    | 52%  | 45%  | 55%  | 54%        | 75%        | 48%        | 49%        | 71%          | 49%          | 44%          |
| Omp3     |      |      | -    | 47%  | 73%  | 78%        | 52%        | 52%        | 61%        | 54%          | 46%          | 50%          |
| Cop2     |      |      |      | -    | 46%  | 46%        | 48%        | 52%        | 44%        | 50%          | 47%          | 40%          |
| Cop3     |      |      |      |      | -    | 77%        | 55%        | 50%        | 61%        | 53%          | 46%          | 46%          |
| CpSTS3   |      |      |      |      |      | -          | 52%        | 52%        | 60%        | 54%          | 46%          | 51%          |
| CpSTS5   |      |      |      |      |      |            | -          | 48%        | 49%        | 69%          | 48%          | 44%          |
| ShSTS7   |      |      |      |      |      |            |            | -          | 46%        | 54%          | 48%          | 45%          |
| ShSTS6   |      |      |      |      |      |            |            |            | -          | 51%          | 43%          | 48%          |
| PpSTS-01 |      |      |      |      |      |            |            |            |            | -            | 47%          | 45%          |
| PpSTS-03 |      |      |      |      |      |            |            |            |            |              | -            | 40%          |
| PpSTS-06 |      |      |      |      |      |            |            |            |            |              |              | -            |

(B) clade II

|          | Omp4 | Omp5 | Cop4 | CpSTS<br>2 | CpSTS<br>8 | CpSTS<br>9 | CpSTS<br>11 | CpSTS<br>12 | CpSTS<br>13 | CpSTS<br>16 | ShSTS<br>8 | ShSTS<br>10 | ShSTS<br>11 | ShSTS<br>12 | ShSTS<br>9 | PpSTS<br>-10 |
|----------|------|------|------|------------|------------|------------|-------------|-------------|-------------|-------------|------------|-------------|-------------|-------------|------------|--------------|
| Omp4     | -    | 66%  | 60%  | 59%        | 41%        | 45%        | 39%         | 41%         | 37%         | 37%         | 52%        | 52%         | 61%         | 53%         | 50%        | 68%          |
| Omp5     |      | -    | 51%  | 49%        | 38%        | 40%        | 36%         | 37%         | 34%         | 34%         | 46%        | 49%         | 52%         | 47%         | 46%        | 54%          |
| Cop4     |      |      | -    | 60%        | 39%        | 40%        | 36%         | 39%         | 36%         | 37%         | 53%        | 50%         | 55%         | 53%         | 51%        | 61%          |
| CpSTS2   |      |      |      | -          | 38%        | 38%        | 35%         | 36%         | 36%         | 37%         | 51%        | 47%         | 53%         | 49%         | 50%        | 63%          |
| CpSTS8   |      |      |      |            | -          | 56%        | 43%         | 50%         | 41%         | 44%         | 38%        | 37%         | 38%         | 36%         | 40%        | 40%          |
| CpSTS9   |      |      |      |            |            | -          | 51%         | 62%         | 48%         | 48%         | 37%        | 36%         | 38%         | 35%         | 38%        | 41%          |
| CpSTS11  |      |      |      |            |            |            | -           | 45%         | 67%         | 51%         | 35%        | 34%         | 36%         | 36%         | 35%        | 38%          |
| CpSTS12  |      |      |      |            |            |            |             | -           | 43%         | 42%         | 35%        | 35%         | 36%         | 36%         | 35%        | 38%          |
| CpSTS13  |      |      |      |            |            |            |             |             | -           | 50%         | 34%        | 34%         | 33%         | 34%         | 33%        | 37%          |
| CpSTS16  |      |      |      |            |            |            |             |             |             | -           | 34%        | 36%         | 36%         | 36%         | 34%        | 41%          |
| ShSTS8   |      |      |      |            |            |            |             |             |             |             | -          | 51%         | 53%         | 50%         | 68%        | 55%          |
| ShSTS10  |      |      |      |            |            |            |             |             |             |             |            | -           | 66%         | 65%         | 48%        | 55%          |
| ShSTS11  |      |      |      |            |            |            |             |             |             |             |            |             | -           | 71%         | 53%        | 67%          |
| ShSTS12  |      |      |      |            |            |            |             |             |             |             |            |             |             | -           | 49%        | 60%          |
| ShSTS9   |      |      |      |            |            |            |             |             |             |             |            |             |             |             | -          | 54%          |
| PpSTS-10 |      |      |      |            |            |            |             |             |             |             |            |             |             |             |            | -            |

(C) clade III

|              | Omp6 | Omp7 | CpSTS<br>1 | CpSTS<br>4 | CpSTS<br>6 | CpSTS<br>7 | ShSTS<br>13 | ShSTS<br>16 | ShSTS<br>17 | ShSTS<br>18 | ShSTS<br>15 | ShSTS<br>14 | PpSTS<br>-08 | PpSTS<br>-14 |
|--------------|------|------|------------|------------|------------|------------|-------------|-------------|-------------|-------------|-------------|-------------|--------------|--------------|
| Omp6         | -    | 62%  | 45%        | 53%        | 56%        | 44%        | 36%         | 57%         | 55%         | 61%         | 57%         | 37%         | 51%          | 52%          |
| Omp7         |      | -    | 46%        | 55%        | 55%        | 44%        | 39%         | 62%         | 59%         | 63%         | 57%         | 40%         | 53%          | 52%          |
| CpSTS1       |      |      | -          | 46%        | 42%        | 39%        | 34%         | 46%         | 42%         | 43%         | 40%         | 33%         | 45%          | 43%          |
| CpSTS4       |      |      |            | -          | 48%        | 58%        | 39%         | 56%         | 48%         | 53%         | 54%         | 37%         | 55%          | 49%          |
| CpSTS6       |      |      |            |            | -          | 42%        | 33%         | 54%         | 52%         | 54%         | 50%         | 35%         | 47%          | 47%          |
| CpSTS7       |      |      |            |            |            | -          | 37%         | 44%         | 41%         | 44%         | 45%         | 34%         | 48%          | 42%          |
| ShSTS1<br>3  |      |      |            |            |            |            | -           | 37%         | 40%         | 36%         | 39%         | 65%         | 35%          | 35%          |
| ShSTS1<br>6  |      |      |            |            |            |            |             | -           | 61%         | 60%         | 63%         | 41%         | 53%          | 51%          |
| ShSTS1<br>7  |      |      |            |            |            |            |             |             | -           | 59%         | 54%         | 41%         | 48%          | 50%          |
| ShSTS1<br>8  |      |      |            |            |            |            |             |             |             | -           | 56%         | 37%         | 48%          | 51%          |
| ShSTS1<br>5  |      |      |            |            |            |            |             |             |             |             | -           | 37%         | 51%          | 50%          |
| ShSTS1<br>4  |      |      |            |            |            |            |             |             |             |             |             | -           | 38%          | 39%          |
| PpSTS-<br>08 |      |      |            |            |            |            |             |             |             |             |             |             | -            | 60%          |
| PpSTS-<br>14 |      |      |            |            |            |            |             |             |             |             |             |             |              | -            |

**Table S5.** Comparison of active sesquiterpene synthases sequences and predicted protein sequences by Augustus. Conserved motifs (DDxxD and NSE) are described in red bold characters. Sequences described in blue bold characters with underline show differences between active protein sequences and predicted one. Sequences described in orange italic characters due to the misprediction. If the predicted sequences are identical to the active one, those sequences are described in grey characters.

| Gene name | Active protein sequence                                                                                                                                                                                                                                                                                                                                                                                                        | Predicted sequence by Augustus ( <i>A. oryzae</i> )                                                                                                                                                                                                                                                                                                                                                                                                                                     | Predicted sequence by Augustus ( <i>C. cinereus</i> )                                                                                                                                                                                                                                                                                                                                                                                                                                |
|-----------|--------------------------------------------------------------------------------------------------------------------------------------------------------------------------------------------------------------------------------------------------------------------------------------------------------------------------------------------------------------------------------------------------------------------------------|-----------------------------------------------------------------------------------------------------------------------------------------------------------------------------------------------------------------------------------------------------------------------------------------------------------------------------------------------------------------------------------------------------------------------------------------------------------------------------------------|--------------------------------------------------------------------------------------------------------------------------------------------------------------------------------------------------------------------------------------------------------------------------------------------------------------------------------------------------------------------------------------------------------------------------------------------------------------------------------------|
| CpSTS1    | MFAAIPKFYTLPDTLRNWPWKREISPYRQCQA<br>ESVAWLESFRFPSPKAQAVFNKCDFSLVSALCF<br>PKGSPYNLRSVCDLMHTFFTL <b>DEYTD</b> YLDLEGV<br>KTLCEATMDAIRNPKPRPEGEHFGEVARQFW<br>ARARVNAATPACERFVKSWRTYLSNVIQQAERR<br>DAKYICTMEEYLHARRDNIGSDPSFALLEITLVD<br>LPHEVMEHPTIVALARDTTDMIVLAN <b>NDMCSYKKE</b><br>IADDANYNAVTVVMHNHNTNVDGGIOWISDYHD<br>TIVDFHLRLREDVRLKQNGFSPWGARIDREVEAY<br>VEGLGLWIRGHDEWNFSGSRYFGDEGLEVQKS<br>RIVECTVSADPFTFPLIQOEEFVDENA | MFAAIPKFYTLPDTLRNWPWKREISPYRQCQA<br>ESVAWLESFRFPSPKAQAVFNKCDFSLVSALCF<br>PKGSPYNLRSVCDLMHTFFTLDEYTDYLDLEGV<br>KTLCEATMDAIRNPKPRPEGEHFGEVARQFW<br>ARARVNAATPACERFVKSWRTYLSNVIQQAERR<br>DAKYICTMEEYLHARRDNIGSDPSFALLEITLVD<br>LPHEVMEHPTIVALARDTTDMIVLANDMCSYKKE<br>IADDANYNAVTVVMHNHNTNVDGGIOWISDYHD<br>TIVDFHLRLREDVRLKQNGFSPWGARIDREVEAY<br>VEGLGLWIRGHDEWNFSGSRYFGDEGLEVQKS<br>RIVECTVSADPFTFPLIQOEEFVDENA                                                                            | MFAAIPKFYTLPDTLRNWPWKREISPYRQCQA<br>ESVAWLESFRFPSPKAQAVFNKCDFSLVSALCF<br>PKGSPYNLRSVCDLMHTFFTLDEYTDYLDLEGV<br>KTLCEATMDAIRNPKPRPEGEHFGEVARQFW<br>ARARVNAATPACERFVKSWRTYLSNVIQQAERR<br>DAKYICTMEEYLHARRDNIGSDPSFALLEITLVD<br>LPHEVMEHPTIVALARDTTDMIVLANDMCSYKKE<br>IADDANYNAVTVVMHNHNTNVDGGIOWISDYHD<br>TIVDFHLRLREDVRLKQNGFSPWGARIDREVEAY<br>VEGLGLWIRGHDEWNFSGSRYFGDEGLEVQKS<br>RIVECTVSADPFTFPLIQOEEFVDENA                                                                         |
|           | MMAQFYLPALVEQCPGEGGNPHYEQGAESRA<br>WINGYVNFDRKRAFFILGNSNELLCSHVVYVYAGS<br>EEFRSCDFVNVLF <b>DELS</b> EQTKDALETGQIF<br>FLNAMKDERWDDRSKFSMTKEFRKFRLLRRSG<br>PRGTARFLKHWETCYCAAVIREAELREMDVLDL<br>EDFINLRRENSAVRLCYGLIEYCYGIDLPEAVYEDS<br>TFMDIYWAAYVDLVCW <b>NDVYSYDME</b> EQSKGIAG<br>NIVTVLMRNRNMSLQOASNYIGQHCETLMDRFV<br>VSSQVRLPSWGPVVDREVRLYIQGLGAWIKGNL<br>WSFETQRYFGPMHEEVKSTRLVTLRPRERIECC<br>DSDSDSDFE                   | MMAQFYLPALVEQCPGEGGNPHYEQGAESRA<br>WINGYVNFDRKRAFFILGNSNELLCSHVVYVYAGS<br>EEFRSCDFVNVLFDELS EQTKDALETGQIF<br>FLNAMKDERWDDRSKFSMTKEFRKFRLLRRSG<br>PRGTARFLKHWETCYCAAVIREAELREMDVLDL<br>EDFINLRRENSAVRLCYGLIEYCYGIDLPEAVYEDS<br>TFMDIYWAAYVDLVCWNDVYSYDME EQSKGIAG<br>NIVTVLMRNRNMSLQOASNYIGQHCETLMDRFV<br>VSSQVRLPSWGPVVDREVRLYIQGLGAWIKGNL<br>WSFETQRYFGPMHEEVKSTRLVTLRPRERIECC<br>DSDSDSDFE                                                                                            | MMAQFYLPALVEQCPGEGGNPHYEQGAESRA<br>WINGYVNFDRKRAFFILGNSNELLCSHVVYVYAGS<br>EEFRSCDFVNVLFDELS EQTKDALETGQIF<br>FLNAMKDERWDDRSKFSMTKEFRKFRLLRRSG<br>PRGTARFLKHWETCYCAAVIREAELREMDVLDL<br>EDFINLRRENSAVRLCYGLIEYCYGIDLPEAVYEDS<br>TFMDIYWAAYVDLVCWNDVYSYDME EQSKGIAG<br>NIVTVLMRNRNMSLQOASNYIGQHCETLMDRFV<br>VSSQVRLPSWGPVVDREVRLYIQGLGAWIKGNL<br>WSFETQRYFGPMHEEVKSTRLVTLRPRERIECC<br>DSDSDSDFE                                                                                         |
| CpSTS2    | MVATTASTOPDHFVLPDLVSHCSFPLVYHTDGD<br>RIAQSNVNLDSNCPDLNAKQVVALRGLQAGEL<br>TAFQYNTCTPERLRVVSDFMNYL <b>FHLDNISDGM</b><br>MTRETDVLDVVMNALWFSGKYMPTKEQSADE<br>LNPGLARDFWARCIPDAGPGQARFKETLELF<br>FEAVNIQARADDVVPDLESYIDVRRDTSGCKP<br>CWALIEYALDIDLDFVVEHPIEALNQSTNDLVT<br>WSNDIFSYNVEQSRGDTNMMIVLMKYHGHTLQ<br>SAVDYVGDLCQKTTIDDFQANRQKLPWSWGAEVDE<br>MVQRYVYVGLQDWIVVGSLSHWSFQTHRYFGADGA<br>NVKKNRIVKLLPLKA                         | MVATTASTOPDHFVLPDLVSHCSFPLVYHTDGD<br>RIAQSNVNLDSNCPDLNAKQVVALRGLQAGEL<br>TAFQYNTCTPERLRVVSDFMNYL <b>FHLDNISDGM</b><br>MTRETDVLDVVMNALWFSGKYMPTKEQSADE<br>LNPGLARDFWARCIPDAGPGQARFKETLELF<br>FEAVNIQARADDVVPDLESYIDVRRDTSGCKP<br>CWALIEYALDIDLDFVVEHPIEALNQSTNDLVT<br>WSNDIFSYNVEQSRGDTNMMIVLMKYHGHTLQ<br>SAVDYVGDLCQKTTIDDFQANRQKLPWSWGAEVDE<br>MVQRYVYVGLQDWIVVGSLSHWSFQTHRYFGADGA<br>NVKKNRIVKLLPLKA                                                                                  | MVATTASTOPDHFVLPDLVSHCSFPLVYHTDGD<br>RIAQSNVNLDSNCPDLNAKQVVALRGLQAGEL<br>TAFQYNTCTPERLRVVSDFMNYL <b>FHLDNISDGM</b><br>MTRETDVLDVVMNALWFSGKYMPTKEQSADE<br>LNPGLARDFWARCIPDAGPGQARFKETLELF<br>FEAVNIQARADDVVPDLESYIDVRRDTSGCKP<br>CWALIEYALDIDLDFVVEHPIEALNQSTNDLVT<br>WSNDIFSYNVEQSRGDTNMMIVLMKYHGHTLQ<br>SAVDYVGDLCQKTTIDDFQANRQKLPWSWGAEVDE<br>MVQRYVYVGLQDWIVVGSLSHWSFQTHRYFGADGA<br>NVKKNRIVKLLPLKA                                                                               |
|           | CpSTS3                                                                                                                                                                                                                                                                                                                                                                                                                         | MSESNQHLRIPHTLTAWWPRTLNPYYQTVKAE<br>SSAWLESFKAFDPKAQAGFNCSDFNLLASLAP<br>LASKEHLRTGCDLMLNLFV <b>IDEYD</b> IEDEVHAAM<br>VASVTMDALRNPFPKPRRGEIIEGARQFWART<br>VPTITEASHRRFIETFDYLSQSVVQARDRSKQHI<br>RSIQDYLHMRDNIGAKPSFAILELSLDLPDYVMS<br>HPSIQATVTAIDMLIIG <b>NDLCSFRNE</b> HARGDDTH<br>NLIETIARHEFGQGLGHA VNWIESYNKLSRRSFLS<br>AIERVPSWGEEIDTQVAEYLYGLANWVRANDCW<br>SFESHRYFGKHGREIQVHRVVDLACGHPECVQD<br>TDNEVEKPAKGLLYEVEKTYVGPLQVNTKDI<br>AFRSDPFLSARPKDITSTPTRLTVCALLCTLSTFI<br>GWLVKL | MSESNQHLRIPHTLTAWWPRTLNPYYQTVKAE<br>SSAWLESFKAFDPKAQAGFNCSDFNLLASLAP<br>LASKEHLRTGCDLMLNLFVIDEYDIEDEVHAAM<br>VASVTMDALRNPFPKPRRGEIIEGARQFWART<br>VPTITEASHRRFIETFDYLSQSVVQARDRSKQHI<br>RSIQDYLHMRDNIGAKPSFAILELSLDLPDYVMS<br>HPSIQATVTAIDMLIIGNDLCSFRNEHARGDDTH<br>NLIETIARHEFGQGLGHA VNWIESYNKLSRRSFLS<br>AIERVPSWGEEIDTQVAEYLYGLANWVRANDCW<br>SFESHRYFGKHGREIQVHRVVDLACGHPECVQD<br>TDNEVEKPAKGLLYEVEKTYVGPLQVNTKDI<br>AFRSDPFLSARPKDITSTPTRLTVCALLCTLSTFI<br>GWLVKL                |
| CpSTS4    |                                                                                                                                                                                                                                                                                                                                                                                                                                | MSTIATGVALKSTRRPTKFIPLDLSVSHCTFKLRCS<br>RFRQKVTTETKQWLFKGNGLAKDRVKFHGLK<br>AGLLTAMTYPGAAYPQLRVCNDFLTYL <b>FHLDNLS</b><br>DDMDNRGTHTVGNVMMNSLYHPHTYNEPERVG<br>KMARDYFKRVIVTSSGTAQQRFRETMDFFQFSIT<br>EQALDRKNGVIPDLESYITLRRDTSGCKPCWALI<br>EYAYNLHIPDEVMEHPLILSLGEEAANDLVTWSNDI<br><b>FSYNVEQ</b> SKGDTHNMPVVMNQEGLDLQSAVDF<br>VGQMCCKSIDRFVEDASNLPSWGPEIDRDVAVY<br>VNGLADWVIGSLHWSFESERYFGKTGLEVKATR<br>VVPELLPORA                                                                       | MSTIATGVALKSTRRPTKFIPLDLSVSHCTFKLRCS<br>RFRQKVTTETKQWLFKGNGLAKDRVKFHGLK<br>AGLLTAMTYPGAAYPQLRVCNDFLTYL <b>FHLDNLS</b><br>DDMDNRGTHTVGNVMMNSLYHPHTYNEPERVG<br>KMARDYFKRVIVTSSGTAQQRFRETMDFFQFSIT<br>EQALDRKNGVIPDLESYITLRRDTSGCKPCWALI<br>EYAYNLHIPDEVMEHPLILSLGEEAANDLVTWSNDI<br>ECALLRLLPLFDL <b>TRSFHFLD</b> AYNLHIPDEVME<br>HPLILSLGEEAANDLVTWSNDIFSYNVEQSKGDTH<br>NMPVVMNQEGLDLQSAVDFVGQMCCKSIDRFV<br>EDASNLPSWGPEIDRDVAVYVNGLADWVIGSLH<br>WSFESERYFGKTGLEVKATR <b>VPELLPORA</b> |
|           | CpSTS5                                                                                                                                                                                                                                                                                                                                                                                                                         | MLTTPYFTIPDTLRNWPWKRVLNPHQKVCEEEA<br>ADWMRSCGAFTPKSQNAFDRCSFGLLGSLAYP<br>RLGRDGLRIACDLMNMFV <b>IDEYSD</b> VASGREARL<br>QADIVMDALYNPLVPRPVGEWIGEVTRQFWAN<br>AIKATPSSQRRFRVNRQRYVDAVYVQQAQDREA<br>HCIRDVKSIFILRRQTIGAIPLDLLTLEMDEDEV<br>LDHPHIAKLELCEVDMILIG <b>NDLSY</b> SYNEQARGDD<br>THNFVRIVKDERKCNLNDALRWISDYHDLRADEF<br>LNLHMLNPSFGSKLIDEQVKTYYVDGLGNWVRAN<br>ECWSFESERYFGKGLYKQSRVRLPSSIAL<br>QQQNIQDPAAEISDLPAAAGIIV                                                              | MLTTPYFTIPDTLRNWPWKRVLNPHQKVCEEEA<br>ADWMRSCGAFTPKSQNAFDRCSFGLLGSLAYP<br>RLGRDGLRIACDLMNMFVIDEYSDVASGREARL<br>QADIVMDALYNPLVPRPVGEWIGEVTRQFWAN<br>AIKATPSSQRRFRVNRQRYVDAVYVQQAQDREA<br>HCIRDVKSIFILRRQTIGAIPLDLLTLEMDEDEV<br>LDHPHIAKLELCEVDMILIGNDLSYSYNEQARGDD<br>THNFVRIVKDERKCNLNDALRWISDYHDLRADEF<br>LNLHMLNPSFGSKLIDEQVKTYYVDGLGNWVRAN<br>ECWSF <b>VSLKSAK</b> EKT <b>WDLTKQ</b> SERYFGKGLYKQSRVRLPSSIAL<br>QQQNIQDPAAEISDLPAAAGIIV                                            |
| CpSTS6    |                                                                                                                                                                                                                                                                                                                                                                                                                                | MTTSGFRIPNLVVAWPWLRVAVNPHMDQTSQNS<br>SSWLENFHAYPPATQENFRNCRDF <b>GLLAALTYPI</b><br><b>ASK</b> EHLRTGTDFMNLFF <b>DEITE</b> IGDEFSTEV<br>YIAMDALRNP SKLRPKGEHVGVGEITRQFWERSIP<br>HITATSHRRFVCALEAYLKSNNVQARDRSSQHIR<br>RIEYFSTRDRNIGTKPAFVLELGLDPCVMTH<br>PSIQASVTLTMDLMI <b>ANDVFSFKVE</b> HSDRDDANN<br>VLKVVMECRLNARAEIWAADERNQQLRTTFLS<br>SIAEVPVSGGGVDIQVSEYLYGLANWVRANEC<br>WSFESERYFGTHGPTVQKDRWVSLDCGHPQCI<br>TGGTTTPRTSRYPLVGMGIATYALSQYGLMS<br>RATLLRR                           | MTTSGFRIPNLVVAWPWLRVAVNPHMDQTSQNS<br>SSWLENFHAYPPATQENFRNCRDFEHLRTGTDFM<br>NLLFFIDEITEIGDEFSTEVLYIAMDALRNP SKLR<br>PKGEHVGEITRQFWERSIPHITATSHRRFVCALE<br>EAYLKSNNVQARDRSSQHIRRIEYFSTRDRNIG<br>TKPAFVLELGLDIPDCVMTHPSIQASVTLTMDL<br>IANDVFSFKVEHSRDDANNVLKVVMECRLN<br>ARAEIWAADERNQQLRTTFLSIAEVPVSGGGVDI<br>QVSEYLYGLANW <b>VFIYEGW</b> PS <b>GNRKP</b> PREAEQ<br><b>LERVMGDMLVFFHIIPRTPVSETAYWSSVCT</b><br><b>GSSIVFDANLPGGLD</b> DPGEO                                              |
|           | CpSTS7                                                                                                                                                                                                                                                                                                                                                                                                                         | MTTSGFRIPNLVVAWPWLRVAVNPHMDQTSQNS<br>SSWLENFHAYPPATQENFRNCRDFEHLRTGTDFM<br>NLLFFIDEITEIGDEFSTEVLYIAMDALRNP SKLR<br>PKGEHVGEITRQFWERSIPHITATSHRRFVCALE<br>EAYLKSNNVQARDRSSQHIRRIEYFSTRDRNIG<br>TKPAFVLELGLDIPDCVMTHPSIQASVTLTMDL<br>IANDVFSFKVEHSRDDANNVLKVVMECRLN<br>ARAEIWAADERNQQLRTTFLSIAEVPVSGGGVDI<br>QVSEYLYGLANW <b>VFIYEGW</b> PS <b>GNRKP</b> PREAEQ<br><b>LERVMGDMLVFFHIIPRTPVSETAYWSSVCT</b><br><b>GSSIVFDANLPGGLD</b> DPGEO                                                 | MTTSGFRIPNLVVAWPWLRVAVNPHMDQTSQNS<br>SSWLENFHAYPPATQENFRNCRDFEHLRTGTDFM<br>NLLFFIDEITEIGDEFSTEVLYIAMDALRNP SKLR<br>PKGEHVGEITRQFWERSIPHITATSHRRFVCALE<br>EAYLKSNNVQARDRSSQHIRRIEYFSTRDRNIG<br>TKPAFVLELGLDIPDCVMTHPSIQASVTLTMDL<br>IANDVFSFKVEHSRDDANNVLKVVMECRLN<br>ARAEIWAADERNQQLRTTFLSIAEVPVSGGGVDI<br>QVSEYLYGLANW <b>VFIYEGW</b> PS <b>GNRKP</b> PREAEQ<br><b>LERVMGDMLVFFHIIPRTPVSETAYWSSVCT</b><br><b>GSSIVFDANLPGGLD</b> DPGEO                                              |

Table S5. Continued.

| Gene name | Active protein sequence                                                                                                                                                                                                                                                                                                                                                                                                           | Predicted sequence by Augustus ( <i>A. oryzae</i> )                                                                                                                                                                                                                                                                                                                                                                                                                | Predicted sequence by Augustus ( <i>C. cinereus</i> )                                                                                                                                                                                                                                                                                                                                                                                                              |
|-----------|-----------------------------------------------------------------------------------------------------------------------------------------------------------------------------------------------------------------------------------------------------------------------------------------------------------------------------------------------------------------------------------------------------------------------------------|--------------------------------------------------------------------------------------------------------------------------------------------------------------------------------------------------------------------------------------------------------------------------------------------------------------------------------------------------------------------------------------------------------------------------------------------------------------------|--------------------------------------------------------------------------------------------------------------------------------------------------------------------------------------------------------------------------------------------------------------------------------------------------------------------------------------------------------------------------------------------------------------------------------------------------------------------|
| CpSTS8    | MSNTFIVLPNLEETVYSAFFPDHGLNPHYDAVCPH<br>SRAWIKSYSDPIFGPKMRDFMEKCDFELFAAYIC<br>PRASPEALRTSMIDIGNLLWLY <b>DEYTD</b> AEDSVTV<br>KKAIAIVVRLTQDRSFDDGSGWICRLVKEFLDLHV<br>RKKAGPNVSRFRVGHFVDYVVRVDEATQRE<br>HEVLDEIAFYERRRESGAIRLFDFLIESGLHIDLPO<br>YVHEDPAFIAGYNATMDLACWV <b>NDYYSYNMEQ</b><br>AKGHEASNILTVLMKYEHLDLQAAVEYVAKHCEV<br>LAAQFIEAHANLLARSDPNFSEDAARVLDALGDA<br>DAVIGNDRWSFETERYFGKDYKAVKQSRIVKLAGR<br>AEGKHALRN             | <i>(MSNTFIVLPNLEETVYSAFFPDHGLNPHYDAVCP<br/>HSRAWIKSYSDPIFGPK)MRDFMEKCDFELFAAY<br/>ICPRASPEALRTSMIDIGNLLWLYDEYTD</i> AEDSVT<br>VKKAEIAIVVRLTQDRSFDDGSGWICRLVKEFLDLH<br>VRKKAGPNVSRFRVGHFVDYVVRVDEATQRE<br>RHEVLDEIAFYERRRESGAIRLFDFLIESGLHIDL<br>QYVHEDPAFIAGYNATMDLACWVNDYYSYNME<br>QAKGHEASNILTVLMKYEHLDLQAAVEYVAKHC<br>EVLAQFIEAHANLLARSDPNFSEDAARVLDALG<br>DAVIGNDRWSFETERYFGKDYKAVKQSRIVKLAGR<br><b>DKPQQQVNFLLVDMGIVKVLNGLPFASIM</b>                          | <i>(MSNTFIVLPNLEETVYSAFFPDHGLNPHYDAVCP<br/>HSRAWIKSYSDPIFGPK)MRDFMEKCDFELFAAY<br/>ICPRASPEALRTSMIDIGNLLWLYDEYTD</i> AEDSVT<br>VKKAEIAIVVRLTQDRSFDDGSGWICRLVKEFLDLH<br>VRKKAGPNVSRFRVGHFVDYVVRVDEATQRE<br>RHEVLDEIAFYERRRESGAIRLFDFLIESGLHIDL<br>QYVHEDPAFIAGYNATMDLACWVNDYYSYNME<br>QAKGHEASNILTVLMKYEHLDLQAAVEYVAKHC<br>EVLAQFIEAHANLLARSDPNFSEDAARVLDALG<br>DAVIGNDRWSFETERYFGKDYKAVKQSRIVKLAGR<br>GRAEGKHALRN                                                   |
| CpSTS9    | MTVLQFVFSVFTSSKQPTFFLPRLDFTFKVLPNN<br>GLNPHFSTVRPQSRRAWIKQYDGEVCGPKMRAF<br>MDNCNLFELSNAITYPYAEPAGLRAAMDLTNLW<br>LY <b>DEYTD</b> TEDGASAEAAVIVNRALKEPFGNDG<br>SWICRMMQDFRRRHIDKAGPDVARRFITNFCNY<br>VDRVAREAILREKNEVLDPISYILFRRETSAVKTC<br>FDIVEYCLGLNLPQYVHDDPVFVSGYNAAMDVLF<br>FWAN <b>DLFSYNMEQ</b> AKGHSGANIVTVIMKSKRVD<br>LQTAADFVAGYCEALTAQLEAKQILSSRSDPAY<br>SKDAVRVLEAFGDWVRGNDWVSFATERYFGKEN<br>NNAVRESRIVVRAFPDETUKLVE    | MTVLQFVFSVFTSSKQPTFFLPRLDFTFKVLPNN<br>GLNPHFSTVRPQSRRAWIKQYDGEVCGPKMRAF<br>MDNCNLFELSNAITYPYAEPAGLRAAMDLTNLW<br>LYDEYTD <b>EDGASAEAAVIVNRALKEPFGNDG</b><br>SWICRMMQDFRRRHIDKAGPDVARRFITNFCNY<br>VDRVAREAILREKNEVLDPISYILFRRETSAVKTC<br>FDIVEYCLGLNLPQYVHDDPVFVSGYNAAMDVLF<br>WANDLFSYNMEQAKGHSGANIVTVIMKSKRVDL<br>QTAADFVAGYCEALTAQLEAKQILSSRSDPAY<br>KDAVRVLEAFGDWVRGNDWVSFATERYFGKEN<br>NNAVRESRIVVRAFPDETUKLVE                                                  | MTVLQFVFSVFTSSKQPTFFLPRLDFTFKVLPNN<br>GLNPHFSTVRPQSRRAWIKQYDGEVCGPKMRAF<br>MDNCNLFELSNAITYPYAEPAGLRAAMDLTNLW<br>LYDEYTD <b>EDGASAEAAVIVNRALKEPFGNDG</b><br>SWICRMMQDFRRRHIDKAGPDVARRFITNFCNY<br>VDRVAREAILREKNEVLDPISYILFRRETSAVKTC<br>FDIVEYCLGLNLPQYVHDDPVFVSGYNAAMDVLF<br>FWAN <b>DLFSYNMEQ</b> AKGHSGANIVTVIMKSKRVD<br>LQTAADFVAGYCEALTAQLEAKQILSSRSDPAY<br>SKDAVRVLEAFGDWVRGNDWVSFATERYFGKEN<br><b>ENNAVRESRIVVRAFPDETUKLVE</b>                               |
| CpSTS10*  | MAPSYQLPDLPSLSRSFELRANPACKITTKASEA<br>SLIESKSTNGSHVLSLERERLAAMKVGLLAAICF<br>PGSDPTQLRLTDFLTLTVLATRRVKYATLSPQV<br>LTYWTTVDNDGWSLVHDMFNCLKEPLERLA<br>SKANQNKARFGSSVKSRIAQCSSVTEMDMIL<br>DPEIETYLSMNRDLSGLSMIFDLFELTQNLTLTVT<br>DEITRTLDKLKVLATDIVSCSVDAAFNYDQAR<br>GNEKNLISLMRHKRLSVQGALNYAGTLIKQYIDA<br>FMAEERSLLDPTSPSPNSGSLSPWIPFTPLVAS<br>ATAIPPSTPPDPVSKADLTVYVQMLRDCIVGTLN<br>WIYETDLYFGKKGEEIRTFGWIFLSPKVQNNDE<br>REVPGDNVLP | MAPSYQLPDLPSLSRSFELRANPACKITTKASEA<br>SLIESKSTNGSHVLSLERERLAAMKVGLLAAICF<br>PGSDPTQLRLTDFLTLTVLATRRVKYATLSPQV<br>LTYWTTVDNDGWSLVHDMFNCLKEPLERLA<br>SKANQNKARFGSSVKSRIAQCSSVTEMDMIL<br>DPEIETYLSMNRDLSGLSMIFDLFELTQNLTLTVT<br>DEITRTLDKLKVLATDIVSCSVDAAFNYDQAR<br>GNEKNLISLMRHKRLSVQGALNYAGTLIKQYIDA<br>FMAEERSLLDPTSPSPNSGSLSPWIPFTPLVAS<br>ATAIPPSTPPDPVSKADLTVYVQMLRDCIVGTLN<br>WIYETDLYFGKKGEEIRTFGWIFLSPKVQNNDE<br>REVPGDNVLP                                  | MAPSYQLPDLPSLSRSFELRANPACKITTKASEA<br>SLIESKSTNGSHVLSLERERLAAMKVGLLAAICF<br>PGSDPTQLRLTDFLTLTVLATRRVKYATLSPQV<br>LTYWTTVDNDGWSLVHDMFNCLKEPLERLA<br>SKANQNKARFGSSVKSRIAQCSSVTEMDMIL<br>DPEIETYLSMNRDLSGLSMIFDLFELTQNLTLTVT<br>DEITRTLDKLKVLATDIVSCSVDAAFNYDQAR<br>GNEKNLISLMRHKRLSVQGALNYAGTLIKQYIDA<br>FMAEERSLLDPTSPSPNSGSLSPWIPFTPLVAS<br>ATAIPPSTPPDPVSKADLTVYVQMLRDCIVGTLN<br>WIYETDLYFGKKGEEIRTFGWIFLSPKVQNNDE<br>REVPGDNVLP                                  |
| CpSTS11   | MSQKSPSTFRIPDLEAIFSAFFDEGTSFYDDVLP<br>PEARAWIKLYQDQVYGPKMTEFIDRCKIELITYYV<br>HPVASRSCVRAMMDLHNLFWLY <b>DEATD</b> VQSGQ<br>TAQETAKVVRNLSLTPFNDGSGWLCMLQDFRK<br>RHLGDVRSSSFVARFIEHFCFYTDRAVEAIAFRE<br>KORVLDIPSYMAFRRETAARVVMVMDTVEYCAEL<br>ELPRTLDDPVFQVAYDAALDLAFGT <b>NDIHSYNM</b><br>EQSKDHSGANIVTVIMKERGLDVQGAMDYFGGY<br>CEALTAQFLDAKRKIEKREGQEWKDAVILDDGYT<br>HFLTQGVWRWGFATERYFGKKNKEVQETRVVLE<br>RAPFVDHVLAD                | MSQKSPSTFRIPDLEAIFSAFFDEGTSFYDDVLP<br>PEARAWIKLYQDQVYGPKMTEFIDRCKIELITYYV<br>HPVASRSCVRAMMDLHNLFWLYDEATD <b>VQSGQ</b><br>TAQETAKVVRNLSLTPFNDGSGWLCMLQDFRK<br>RHLGDVRSSSFVARFIEHFCFYTDRAVEAIAFRE<br>KORVLDIPSYMAFRRETAARVVMVMDTVEYCAEL<br>ELPRTLDDPVFQVAYDAALDLAFGT <b>NDIHSYNM</b><br>EQSKDHSGANIVTVIMKERGLDVQGAMDYFGGY<br>CEALTAQFLDAKRKIEKREGQEWKDAVILDDGYT<br>HFLTQGVWRWGFATERYFGKKNKEVQETRVVLE<br>RAPFVDHVLAD                                                  | MSQKSPSTFRIPDLEAIFSAFFDEGTSFYDDVLP<br>PEARAWIKLYQDQVYGPKMTEFIDRCKIELITYYV<br>HPVASRSCVRAMMDLHNLFWLYDEATD <b>VQSGQ</b><br>TAQETAKVVRNLSLTPFNDGSGWLCMLQDFRK<br>RHLGDVRSSSFVARFIEHFCFYTDRAVEAIAFRE<br>KORVLDIPSYMAFRRETAARVVMVMDTVEYCAEL<br>ELPRTLDDPVFQVAYDAALDLAFGT <b>NDIHSYNM</b><br>EQSKDHSGANIVTVIMKERGLDVQGAMDYFGGY<br>CEALTAQFLDAKRKIEKREGQEWKDAVILDDGYT<br>HFLTQGVWRWGFATERYFGKKNKEVQETRVVLE<br>RAPFVDHVLAD                                                  |
| CpSTS12   | MESLPVTLVLPRLDDIFDPLPNNVNPNSYIACPA<br>SRLWIEQYGTQIYGPQMAMFNCCNFELSTTYT<br>YPYADAKRLRATMDLNLWLY <b>DEYTD</b> DRASGAH<br>AKEMASIVYQALSQQQVAANSWVGCMMQDFYR<br>QHIEKAGPNTSRFRVDFHFCRYAQQVGEASLRE<br>QRQILNMHEYIDFRRETSGRVSCFDLVEYCLGID<br>LPQFVHDDPIFTMGYNAAMDVLFVW <b>NDLYSYNM</b><br>EQAKHGGAANVTVIMKSKSLGLQAAVDHLADA<br>CEVLTAAQFLAQRSKHPESIFSKEAVKVLDAY<br>GDWVRGNEEWSFVTERYFGKENKAVRQSRMV<br>KIKTPFGEMAPFSGRKNYL                 | MESLPVTLVLPRLDDIFDPLPNNVNPNSYIACPA<br>SRLWIEQYGTQIYGPQMAMFNCCNFELSTTYT<br>YPYADAKRLRATMDLNLWLYDEYTD <b>DRASGAH</b><br>AKEMASIVYQALSQQQVAANSWVGCMMQDFYR<br>QHIEKAGPNTSRFRVDFHFCRYAQQVGEASLRE<br>QRQILNMHEYIDFRRETSGRVSCFDLVEYCLGID<br>LPQFVHDDPIFTMGYNAAMDVLFVW <b>NDLYSYNM</b><br>EQAKHGGAANVTVIMKSKSLGLQAAVDHLADA<br>CEVLTAAQFLAQRSKHPESIFSKEAVKVLDAY<br>GDWVRGNEEWSFVTERYFGKENKAVRQSRMV<br>KIKTPFGEMAPFSGRKNYL                                                   | MESLPVTLVLPRLDDIFDPLPNNVNPNSYIACPA<br>SRLWIEQYGTQIYGPQMAMFNCCNFELSTTYT<br>YPYADAKRLRATMDLNLWLYDEYTD <b>DRASGAH</b><br>AKEMASIVYQALSQQQVAANSWVGCMMQDFYR<br>QHIEKAGPNTSRFRVDFHFCRYAQQVGEASLRE<br>QRQILNMHEYIDFRRETSGRVSCFDLVEYCLGID<br>LPQFVHDDPIFTMGYNAAMDVLFVW <b>NDLYSYNM</b><br>EQAKHGGAANVTVIMKSKSLGLQAAVDHLADA<br>CEVLTAAQFLAQRSKHPESIFSKEAVKVLDAY<br>GDWVRGNEEWSFVTERYFGKENKAVRQSRMV<br>KIKTPFGEMAPFSGRKNYL                                                   |
| CpSTS13   | MPQDPPTTFRIPDLETIFSVFPDEGTPHYDDVFP<br>PEAREWILRYSKHYVYGPKMAEFIDSCKVELLTCY<br>IYPSASKSRLRSMMDLNLFWIYDDETTDVQGTQGE<br>AKETAQVVRNLTNDFSDSWLCAILQDFRRR<br>EKDLMIDIEYLFKFRREAAAVRVVLDSEYCLDLE<br>ELQNVMDDPVFMAYNAALDLAFGT <b>NDIQSYNM</b><br>EQAKHGGAANVTVIMKSKSLGLQAAVDHLADA<br>CEVLTAAQFLAQRSKHPESIFSKEAVKVLDAY<br>GDWVRGNEEWSFVTERYFGKENKAVRQSRMV<br>KIKTPFGEMAPFSGRKNYL                                                            | <i>(MPQDPPTTFRIPDLETIFSVFPDEGTPHYDDVFP<br/>PEAREWILRYSKHYVYGPKMAEFIDSCKVELLTCY<br/>IYPSASKSRLRSMMDLNLFWIYDDETTDVQGTQGE<br/>AKETAQVVRNLTNDFSDSWLCAILQDFRRR<br/>EKDLMIDIEYLFKFRREAAAVRVVLDSEYCLDLE<br/>ELEQNVMDDPVFMAYNAALDLAFGTNDIQSYN<br/>MEQAKQHKGANIISVIMRARTLDLQGAMDYFGG<br/>YCOALTAQFLDAKCKIEKRVDRPEWKDAVRILEG<br/>YGCFLAQGL<b>TECESL</b>TQGGIAGFFYEQALALQ<br/>SRISIFSPGICRDDDTFKSLVSKTDFSGTSLARF<br/>TCTYHMPEMAYMACHYHAYDAEFRVDPSTSEAN<br/>GCIAPTTRCEIPLS</i> | <i>(MPQDPPTTFRIPDLETIFSVFPDEGTPHYDDVFP<br/>PEAREWILRYSKHYVYGPKMAEFIDSCKVELLTCY<br/>IYPSASKSRLRSMMDLNLFWIYDDETTDVQGTQGE<br/>AKETAQVVRNLTNDFSDSWLCAILQDFRRR<br/>EKDLMIDIEYLFKFRREAAAVRVVLDSEYCLDLE<br/>ELEQNVMDDPVFMAYNAALDLAFGTNDIQSYN<br/>MEQAKQHKGANIISVIMRARTLDLQGAMDYFGG<br/>YCOALTAQFLDAKCKIEKRVDRPEWKDAVRILEG<br/>YGCFLAQGL<b>TECESL</b>TQGGIAGFFYEQALALQ<br/>SRISIFSPGICRDDDTFKSLVSKTDFSGTSLARF<br/>TCTYHMPEMAYMACHYHAYDAEFRVDPSTSEAN<br/>GCIAPTTRCEIPLS</i> |
| CpSTS14   | MNVMTPIITATMPVSPPCPNPDTFTQTRLSAR<br>WHPSTAEIVKRVQYVQNWVPSSEESKRRYLT<br>GNAEDGVMYAFPGVKNDRIEAVTTWLALHFLID<br>DYLESVSDSAASGLDPGKKKEAIQRLFGIMRRLV<br>RPNVNNPVEMVDHVASSFLSCSSEDEVAQRH<br>ARQILESTIQFITAAENGDGKATAMGDNLNSLAY<br>RMVEAGVFLSLDLAFVGGGEIYIPSHISNDPQIRSF<br>FKLVSDHLLV <b>NDIYSYKVE</b> QDRSEGVGGAFNA<br>VSVLMRSKHVDAQDAMIQTQLTLEEAATLEEA<br>AVLDRDYAEKGEVEEVVKMIQTILEMAGNCE<br>WSKFCGRYNSSPVDEASVGTDRALEQGTSTLS           | <i>(MNVMTPIITATMPVSPPCPNPDTFTQTRLSAR<br/>WHPSTAEIVKRVQYVQNWVPSSEESKRRYLT<br/>GNAEDGVMYAFPGVKNDRIEAVTTWLALHFLID<br/>DYLESVSDSAASGLDPGKKKEAIQRLFGIMRRLV<br/>RPNVNNPVEMVDHVASSFLSCSSEDEVAQRH<br/>ARQILESTIQFITAAENGDGKATAMGDNLNSLAY<br/>RMVEAGVFLSLDLAFVGGGEIYIPSHISNDPQIRSF<br/>FKLVSDHLLV<b>NDIYSYKVE</b>QDRSEGVGGAFNA<br/>VSVLMRSKHVDAQDAMIQTQLTLEEAATLEEA<br/>AVLDRDYAEKGEVEEVVKMIQTILEMAGNCE<br/>WSKFCGRYNSSPVDEASVGTDRALEQGTSTLS</i>                            | <i>(MNVMTPIITATMPVSPPCPNPDTFTQTRLSAR<br/>WHPSTAEIVKRVQYVQNWVPSSEESKRRYLT<br/>GNAEDGVMYAFPGVKNDRIEAVTTWLALHFLID<br/>DYLESVSDSAASGLDPGKKKEAIQRLFGIMRRLV<br/>RPNVNNPVEMVDHVASSFLSCSSEDEVAQRH<br/>ARQILESTIQFITAAENGDGKATAMGDNLNSLAY<br/>RMVEAGVFLSLDLAFVGGGEIYIPSHISNDPQIRSF<br/>FKLVSDHLLV<b>NDIYSYKVE</b>QDRSEGVGGAFNA<br/>VSVLMRSKHVDAQDAMIQTQLTLEEAATLEEA<br/>AVLDRDYAEKGEVEEVVKMIQTILEMAGNCE<br/>WSKFCGRYNSSPVDEASVGTDRALEQGTSTLS</i>                            |

\* Amino acid sequence based on the recovered cDNA sequence from AO-transformant is shown in the left column, demonstrating that CpSTS10 lacks the catalytic motifs (DDxD and NSE motifs).

Table S5. Continued.

| Gene name | Active protein sequence                                                                                                                                                                                                                                                                                                                                                                                                                                                                                                                                                                                                                                                                                                             | Predicted sequence by Augustus ( <i>A. oryzae</i> )                                                                                                                                                                                                                                                                                                                                                                                                                                                                                                                                                                                                                                                                                 | Predicted sequence by Augustus ( <i>C. cinereus</i> )                                                                                                                                                                                                                                                                                                                                                                                                                                                                                                                                                                                                                                                                               |
|-----------|-------------------------------------------------------------------------------------------------------------------------------------------------------------------------------------------------------------------------------------------------------------------------------------------------------------------------------------------------------------------------------------------------------------------------------------------------------------------------------------------------------------------------------------------------------------------------------------------------------------------------------------------------------------------------------------------------------------------------------------|-------------------------------------------------------------------------------------------------------------------------------------------------------------------------------------------------------------------------------------------------------------------------------------------------------------------------------------------------------------------------------------------------------------------------------------------------------------------------------------------------------------------------------------------------------------------------------------------------------------------------------------------------------------------------------------------------------------------------------------|-------------------------------------------------------------------------------------------------------------------------------------------------------------------------------------------------------------------------------------------------------------------------------------------------------------------------------------------------------------------------------------------------------------------------------------------------------------------------------------------------------------------------------------------------------------------------------------------------------------------------------------------------------------------------------------------------------------------------------------|
| CpSTS15*  | MSSHRPTQQPNPLVDPDFVSKFLAHDREDRDE<br>IITSVQAYFLAHWDWSPSTRKAWYSKADLEDWT<br>TLMCPAGPSEAWAFTAYVTFWFLYD <del>DL</del> MEIMG<br>PEELGSSIPRIARILHGEEGLDMMTPPEFILKEICL<br>KINTIAPGKRIFEATLVYMKAAATAKQERLQSLTLG<br>FDAYLKYRMLDAACWLTLEGAYVWQEIPIEHLK<br>TEKIWLQLSFLHGILINDLFSYRKEVKASSQEV<br>QDHDKTYLNGLVLMQSYQFTLLEALEEMKKKIW<br>DYEDFMAVLDD <del>RSFLPPLNTLKMELADVHAL</del><br>LN <del>LN</del> CL <del>SG</del> LSLITL <del>GT</del> EYLV <del>FR</del> PPPTSP <del>RS</del> FPR<br>T <del>PP</del> PDH <del>SL</del> SHYQGS <del>NS</del> RLHEAALTYGYDHLVPI<br>L <del>VE</del> VLV <del>FG</del> PLT <del>QA</del> LSGNGYGNNEK <del>VNDR</del> FKF<br>RVASDKVIQLLA                                                                       | MSSHRPTQQPNPLVDPDFVSKFLAHDREDRDE<br>IITSVQAYFLAHWDWSPSTRKAWYSKADLEDWT<br>TLMCPAGPSEAWAFTAYVTFWFLYD <del>DL</del> MEIMG<br>PEELGSSIPRIARILHGEEGLDMMTPPEFILKEICL<br>KINTIAPGKRIFEATLVYMKAAATAKQERLQSLTLG<br>FDAYLKYRMLDAACWLTLEGAYVWQEIPIEHLK<br>TEKIWLQLSFLHGILINDLFSYRKEVKASSQEV<br>QDHDKTYLNGLVLMQSYQFTLLEALEEMKKKIW<br>DYEDFMAVLDD <del>RSFLPPLNTLKMELADVHAL</del><br>LN <del>LN</del> CL <del>SG</del> LSLITL <del>GT</del> EYLV <del>FR</del> PPPTSP <del>RS</del> FPR<br>T <del>PP</del> PDH <del>SL</del> SHYQGS <del>NS</del> RLHEAALTYGYDHLVPI<br>L <del>VE</del> VLV <del>FG</del> PLT <del>QA</del> LSGNGYGNNEK <del>VNDR</del> FKF<br>RVASDKVIQLLA                                                                       | MSSHRPTQQPNPLVDPDFVSKFLAHDREDRDE<br>IITSVQAYFLAHWDWSPSTRKAWYSKADLEDWT<br>TLMCPAGPSEAWAFTAYVTFWFLYD <del>DL</del> MEIMG<br>PEELGSSIPRIARILHGEEGLDMMTPPEFILKEICL<br>KINTIAPGKRIFEATLVYMKAAATAKQERLQSLTLG<br>FDAYLKYRMLDAACWLTLEGAYVWQEIPIEHLK<br>TEKIWLQLSFLHGILINDLFSYRKEVKASSQEV<br>QDHDKTYLNGLVLMQSYQFTLLEALEEMKKKIW<br>DYEDFMAVLDD <del>RSFLPPLNTLKMELADVHAL</del><br>LN <del>LN</del> CL <del>SG</del> LSLITL <del>GT</del> EYLV <del>FR</del> PPPTSP <del>RS</del> FPR<br>T <del>PP</del> PDH <del>SL</del> SHYQGS <del>NS</del> RLHEAALTYGYDHLVPI<br>L <del>VE</del> VLV <del>FG</del> PLT <del>QA</del> LSGNGYGNNEK <del>VNDR</del> FKF<br>RVASDKVIQLLA                                                                       |
| CpSTS16   | MPLPVTFRPLDLSIFSPDLGINSHYECTYPES<br>REWIAQYHTGVYGPKMRDFMERGKIELLGAYTY<br>PYASKERLRFVMDLHNVS <del>WLF</del> DES <del>SD</del> VKTGOQ<br>AGVTA <del>VV</del> FRALIDPEFNDG <del>SWL</del> CHMLKDFRQR<br>HLDNVM <del>SHAF</del> VEMFIRDFIGYADGMSAEACYRDL<br>LNKVL <del>DIAG</del> YV <del>KLR</del> REAGAVRLAHSVEYCLEKE<br>LPSYVREDPAFVIA <del>NGAL</del> DLGYV <del>NDHS</del> Y <del>YN</del> ME<br>QSKGHG <del>HHAAN</del> IVTFMEAQNIGLQAA <del>MD</del> YAGG<br>FCHGLV <del>LQ</del> LEAKELLAARSDPVF <del>SNDA</del> VKIEG<br>CINFFKQ <del>DI</del> WDFESERFFGKSDAVR <del>KT</del> VVNL<br>RALFEDSVN <del>LN</del> E                                                                                                                | MVKLGD <del>IQ</del> HIP <del>SP</del> DMPLPVTFRPLDLSIFSPDL<br>GINSHYECTYPESREWIAQYHTGVYGPKMRDF<br>MERGKIELLGAYTYPYASKERLRFVMDLHNVS<br>WLFDES <del>SD</del> VKTGOQAGVTA <del>VV</del> FRALIDPEFNDG<br>SWLCHMLKDFRQRHLDNVM <del>SHAF</del> VEMFIRDFIG<br>YADGMSAEACYRDLNKVL <del>DIAG</del> YV <del>KLR</del> REAGAV<br>RLAHSVEYCLEKE <del>LPSY</del> VREDPAFVIA <del>NGAL</del><br>DLGYV <del>NDHS</del> Y <del>YN</del> MEQSKGHG <del>HHAAN</del> IVTFME<br>AQNIGLQAA <del>MD</del> YAGGFC <del>HGL</del> V <del>LQ</del> LEAKELLAAR<br>SDPVF <del>SNDA</del> VKIEGCINFFKQ <del>DI</del> WDFESERFFG<br>KSDAVR <del>KT</del> VVNLRALFEDSVN <del>LN</del> E                                                                          | MPLPVTFRPLDLSIFSPDLGINSHYECTYPES<br>REWIAQYHTGVYGPKMRDFMERGKIELLGAYTY<br>PYASKERLRFVMDLHNVS <del>WLF</del> DES <del>SD</del> VKTGOQ<br>AGVTA <del>VV</del> FRALIDPEFNDG <del>SWL</del> CHMLKDFRQR<br>HLDNVM <del>SHAF</del> VEMFIRDFIGYADGMSAEACYRDL<br>LNKVL <del>DIAG</del> YV <del>KLR</del> REAGAVRLAHSVEYCLEKE<br>LPSYVREDPAFVIA <del>NGAL</del> DLGYV <del>NDHS</del> Y <del>YN</del> ME<br>QSKGHG <del>HHAAN</del> IVTFMEAQNIGLQAA <del>MD</del> YAGG<br>FCHGLV <del>LQ</del> LEAKELLAARSDPVF <del>SNDA</del> VKIEG<br>CINFFKQ <del>DI</del> WDFESERFFGKSDAVR <del>KT</del> VVNL<br>RALFEDSVN <del>LN</del> E                                                                                                                |
| CpSTS17   | MNSDLQSTLASLDTTYTCRFRARYHAKSEQVMT<br>VVQDYFVKRWPWRSEQAQKLYIKT <del>LN</del> LEEATCIC<br>FPTLLDDRIETVTVWFCYMHILD <del>DI</del> EGLANKAT<br>KLVDRLSN <del>IL</del> GLTDPDPEDRLGVMAADVCSRRF<br>LGENDGEEKHGDI <del>ISE</del> CKLLRHTSSADSKLQS<br>LSTYDTFIEWREL <del>DVGL</del> WFSTSLFLWGC <del>GI</del> YMR<br>HMSNDPEV <del>RQL</del> LRVSGR <del>HI</del> AV <del>AND</del> LFSYRVEAL<br>RAGQTSQILLNTIAIAKEKQVDPQTAMNMTKQRL<br>SEMEEEVEVLIGKLRD <del>RYT</del> GEEGELIERL <del>FV</del> CK<br>GMMAGNCEWSSICFRYNGAQR <del>AVAA</del>                                                                                                                                                                                                  | MNSDLQSTLASLDTTYTCRFRARYHAKSEQVMT<br>VVQDYFVKRWPWRSEQAQKLYIKT <del>LN</del> LEEATCIC<br>FPTLLDDRIETVTVWFCYMHILD <del>DI</del> EGLANKAT<br>KLVDRLSN <del>IL</del> GLTDPDPEDRLGVMAADVCSRRF<br>LGENDGEEKHGDI <del>ISE</del> CKLLRHTSSADSKLQS<br>LSTYDTFIEWREL <del>DVGL</del> WFSTSLFLWGC <del>GI</del> YMR<br>HMSNDPEV <del>RQL</del> LRVSGR <del>HI</del> AV <del>AND</del> LFSYRVEAL<br>RAGQTSQILLNTIAIAKEKQVDPQTAMNMTKQRL<br>SEMEEEVEVLIGKLRD <del>RYT</del> GEEGELIERL <del>FV</del> CK<br>GMMAGNCEWSSICFRYNGAQR <del>AVAA</del>                                                                                                                                                                                                  | MNSDLQSTLASLDTTYTCRFRARYHAKSEQVMT<br>VVQDYFVKRWPWRSEQAQKLYIKT <del>LN</del> LEEATCIC<br>FPTLLDDRIETVTVWFCYMHILD <del>DI</del> EGLANKAT<br>KLVDRLSN <del>IL</del> GLTDPDPEDRLGVMAADVCSRRF<br>LGENDGEEKHGDI <del>ISE</del> CKLLRHTSSADSKLQS<br>LSTYDTFIEWREL <del>DVGL</del> WFSTSLFLWGC <del>GI</del> YMR<br>HMSNDPEV <del>RQL</del> LRVSGR <del>HI</del> AV <del>AND</del> LFSYRVEAL<br>RAGQTSQILLNTIAIAKEKQVDPQTAMNMTKQRL<br>SEMEEEVEVLIGKLRD <del>RYT</del> GEEGELIERL <del>FV</del> CK<br>GMMAGNCEWSSICFRYNGAQR <del>AVAA</del>                                                                                                                                                                                                  |
| CpSTS18   | MVHWNHPTFVLRNICDITGRV <del>FEL</del> KENPRIA<br>NSAVLKWFEQFNVDK <del>KA</del> DKFLNVGKFDIFAAL<br>SFEADLEHLTCLIFFLWAFAT <del>DDL</del> SD <del>E</del> GEFQS<br>QPDQVQHGHDISCSILDDDDAPQPDY <del>Y</del> AAAMLW<br>DLLRRLRSTGHMGMYKRFKQAFLDFSSQVQQ<br>STNRNVDRI <del>PP</del> VEDEFILMRRTIGAA <del>L</del> VEAMVEY<br>SLDLDIPS <del>Y</del> W <del>EH</del> PVIVGMSQATSDIMT <del>WP</del> N <del>DL</del> C<br>SFN <del>AV</del> QKEQADGDYVNL <del>CV</del> LQHNHGLELQEAIDL<br>TKMISDRVQDYVDLKNQLPSFGPDVDPALHTYLT<br>ALEQFVQGTVVVWYSSPRYFRHLDPRGKPEVLI<br>HLFPKTDAPTL <del>PV</del> VVQEKSRPFIEREILPAKRL<br>GVFVNYVAITVFGYSVYRLYGD <del>S</del>                                                                                       | MVHWNHPTFVLRNICDITGRV <del>FEL</del> KENPRIA<br>NSAVLKWFEQFNVDK <del>KA</del> DKFLNVGKFDIFAAL<br>SFEADLEHLTCLIFFLWAFAT <del>DDL</del> SD <del>E</del> GEFQS<br>QPDQVQHGHDISCSILDDDDAPQPDY <del>Y</del> AAAMLW<br>DLLRRLRSTGHMGMYKRFKQAFLDFSSQVQQ<br>STNRNVDRI <del>PP</del> VEDEFILMRRTIGAA <del>L</del> VEAMVEY<br>SLDLDIPS <del>Y</del> W <del>EH</del> PVIVGMSQATSDIMT <del>WP</del> N <del>DL</del> C<br>SFN <del>AV</del> QKEQADGDYVNL <del>CV</del> LQHNHGLELQEAIDL<br>TKMISDRVQDYVDLKNQLPSFGPDVDPALHTYLT<br>ALEQFVQGTVVVWYSSPRYFRHLDPRGKPEVLI<br>HLFPKTDAPTL <del>PV</del> VVQEKSRPFIEREILPAKRL<br>GVFVNYVAITVFGYSVYRLYGD <del>S</del>                                                                                       | MVHWNHPTFVLRNICDITGRV <del>FEL</del> KENPRIA<br>NSAVLKWFEQFNVDK <del>KA</del> DKFLNVGKFDIFAAL<br>SFEADLEHLTCLIFFLWAFAT <del>DDL</del> SD <del>E</del> GEFQS<br>QPDQVQHGHDISCSILDDDDAPQPDY <del>Y</del> AAAMLW<br>DLLRRLRSTGHMGMYKRFKQAFLDFSSQVQQ<br>STNRNVDRI <del>PP</del> VEDEFILMRRTIGAA <del>L</del> VEAMVEY<br>SLDLDIPS <del>Y</del> W <del>EH</del> PVIVGMSQATSDIMT <del>WP</del> N <del>DL</del> C<br>SFN <del>AV</del> QKEQADGDYVNL <del>CV</del> LQHNHGLELQEAIDL<br>TKMISDRVQDYVDLKNQLPSFGPDVDPALHTYLT<br>ALEQFVQGTVVVWYSSPRYFRHLDPRGKPEVLI<br>HLFPKTDAPTL <del>PV</del> VVQEKSRPFIEREILPAKRL<br>GVFVNYVAITVFGYSVYRLYGD <del>S</del>                                                                                       |
| ShSTS1    | MESVREH <del>IP</del> R <del>LQ</del> HFLGEIGYRHTTTPAPTLD <del>FL</del> H<br>AHHWHI <del>H</del> VLGPM <del>T</del> SWTVAK <del>LN</del> ALEDSSSTIFER<br>AYPLSDAEMK <del>FV</del> LAKLTAIAIFL <del>DD</del> SLDEEET <del>Y</del> DDI<br>GNFAHR <del>Y</del> VLGEOAQTGVLTLYHQIQELSKMHE<br>GDAVFRGLAVAPWITFIDACMLEKRLT <del>FD</del> SKLR<br>VSPRDLGYQRLRNSTDF <del>T</del> SLRAPKATPSEVEVS<br>PFILRHKSGIGEAYAAIFKSSRYQELPLSRFVK<br>SMPDMIYIELVNDLMSFYKEQLAGETANL <del>I</del> LHQ<br>HOSWKGGOGTGPGYSWTL <del>LD</del> TFSRLCDDTRDA<br>AFRVDELRLDECEKIANGELRGEVGLSPMDVT<br>MAAQWREFRDGYVSWHLECQRYK <del>LD</del> FIK <del>LS</del> TFE                                                                                                | MESVREH <del>IP</del> R <del>LQ</del> HFLGEIGYRHTTTPAPTLD <del>FL</del> H<br>AHHWHI <del>H</del> VLGPM <del>T</del> SWTVAK <del>LN</del> ALEDSSSTIFER<br>AYPLSDAEMK <del>FV</del> LAKLTAIAIFL <del>DD</del> SLDEEET <del>Y</del> DDI<br>GNFAHR <del>Y</del> VLGEOAQTGVLTLYHQIQELSKMHE<br>GDAVFRGLAVAPWITFIDACMLEKRLT <del>FD</del> SKLR<br>VSPRDLGYQRLRNSTDF <del>T</del> SLRAPKATPSEVEVS<br>PFILRHKSGIGEAYAAIFKSSRYQELPLSRFVK<br>SMPDMIYIELVNDLMSFYKEQLAGETANL <del>I</del> LHQ<br>HOSWKGGOGTGPGYSWTL <del>LD</del> TFSRLCDDTRDA<br>AFRVDELRLDECEKIANGELRGEVGLSPMDVT<br>MAAQWREFRDGYVSWHLECQRYK <del>LD</del> FIK <del>LS</del> TFE                                                                                                | MESVREH <del>IP</del> R <del>LQ</del> HFLGEIGYRHTTTPAPTLD <del>FL</del> H<br>AHHWHI <del>H</del> VLGPM <del>T</del> SWTVAK <del>LN</del> ALEDSSSTIFER<br>AYPLSDAEMK <del>FV</del> LAKLTAIAIFL <del>DD</del> SLDEEET <del>Y</del> DDI<br>GNFAHR <del>Y</del> VLGEOAQTGVLTLYHQIQELSKMHE<br>GDAVFRGLAVAPWITFIDACMLEKRLT <del>FD</del> SKLR<br>VSPRDLGYQRLRNSTDF <del>T</del> SLRAPKATPSEVEVS<br>PFILRHKSGIGEAYAAIFKSSRYQELPLSRFVK<br>SMPDMIYIELVNDLMSFYKEQLAGETANL <del>I</del> LHQ<br>HOSWKGGOGTGPGYSWTL <del>LD</del> TFSRLCDDTRDA<br>AFRVDELRLDECEKIANGELRGEVGLSPMDVT<br>MAAQWREFRDGYVSWHLECQRYK <del>LD</del> FIK <del>LS</del> TFE                                                                                                |
| ShSTS3    | MSTAKPEIP <del>M</del> ESFPPIN <del>V</del> PREAEI <del>K</del> YCN <del>N</del> YVA<br>EHFFPN <del>ND</del> AEVKHFN <del>G</del> MEIPAYACRVV <del>S</del> FARDH<br>EKMRK <del>V</del> SILV <del>F</del> YFID <del>DD</del> V <del>Y</del> DKNGMKL <del>D</del> KSTVMA<br>LLPPPSEVP <del>IK</del> PPQAGKMTLSDISAEL <del>Y</del> GAVR <del>DD</del><br>MPKADY <del>DRM</del> VNDMMEYLRVQRM <del>AP</del> GYNTLQEL<br>LDLRSGEV <del>GY</del> V <del>LF</del> FRYI <del>Y</del> AMELSVSGKELDD <del>PL</del> V<br>KRAQVLGSEAGVLRNEASSY <del>V</del> KEVNEGSGA <del>HN</del><br>VITKLEQW <del>SG</del> CTEKEAMQVLD <del>AI</del> EKRQEELRE<br>MCLKVTEAPHLSDECKTFVK <del>T</del> IPYIVAGNT <del>W</del> WH<br>HHSTRYAEGRE <del>V</del> TV | MSTAKPEIP <del>M</del> ESFPPIN <del>V</del> PREAEI <del>K</del> YCN <del>N</del> YVA<br>EHFFPN <del>ND</del> AEVKHFN <del>G</del> MEIPAYACRVV <del>S</del> FARDH<br>EKMRK <del>V</del> SILV <del>F</del> YFID <del>DD</del> V <del>Y</del> DKNGMKL <del>D</del> KSTVMA<br>LLPPPSEVP <del>IK</del> PPQAGKMTLSDISAEL <del>Y</del> GAVR <del>DD</del><br>MPKADY <del>DRM</del> VNDMMEYLRVQRM <del>AP</del> GYNTLQEL<br>LDLRSGEV <del>GY</del> V <del>LF</del> FRYI <del>Y</del> AMELSVSGKELDD <del>PL</del> V<br>KRAQVLGSEAGVLRNEASSY <del>V</del> KEVNEGSGA <del>HN</del><br>VITKLEQW <del>SG</del> CTEKEAMQVLD <del>AI</del> EKRQEELRE<br>MCLKVTEAPHLSDECKTFVK <del>T</del> IPYIVAGNT <del>W</del> WH<br>HHSTRYAEGRE <del>V</del> TV | MSTAKPEIP <del>M</del> ESFPPIN <del>V</del> PREAEI <del>K</del> YCN <del>N</del> YVA<br>EHFFPN <del>ND</del> AEVKHFN <del>G</del> MEIPAYACRVV <del>S</del> FARDH<br>EKMRK <del>V</del> SILV <del>F</del> YFID <del>DD</del> V <del>Y</del> DKNGMKL <del>D</del> KSTVMA<br>LLPPPSEVP <del>IK</del> PPQAGKMTLSDISAEL <del>Y</del> GAVR <del>DD</del><br>MPKADY <del>DRM</del> VNDMMEYLRVQRM <del>AP</del> GYNTLQEL<br>LDLRSGEV <del>GY</del> V <del>LF</del> FRYI <del>Y</del> AMELSVSGKELDD <del>PL</del> V<br>KRAQVLGSEAGVLRNEASSY <del>V</del> KEVNEGSGA <del>HN</del><br>VITKLEQW <del>SG</del> CTEKEAMQVLD <del>AI</del> EKRQEELRE<br>MCLKVTEAPHLSDECKTFVK <del>T</del> IPYIVAGNT <del>W</del> WH<br>HHSTRYAEGRE <del>V</del> TV |

\* Amino acid sequence based on the recovered cDNA sequence from AO-transformant is shown in the left column although it is not active in AO.

Table S5. Continued.

| Gene name | Active protein sequence                                                                                                                                                                                                                                                                                                                                                                                                                                                                                                                                                                                                                                                                                                                                                                                                                                                                                                                           | Predicted sequence by Augustus ( <i>A. oryzae</i> )                                                                                                                                                                                                                                                                                                                                                                                                                                                                                                                                                                                                                                                                                                                                                                                                                                                                                               | Predicted sequence by Augustus ( <i>C. cinereus</i> )                                                                                                                                                                                                                                                                                                                                                                                                                                                                                                                                                                                                                                                                                                                                                                                                                                                                                             |
|-----------|---------------------------------------------------------------------------------------------------------------------------------------------------------------------------------------------------------------------------------------------------------------------------------------------------------------------------------------------------------------------------------------------------------------------------------------------------------------------------------------------------------------------------------------------------------------------------------------------------------------------------------------------------------------------------------------------------------------------------------------------------------------------------------------------------------------------------------------------------------------------------------------------------------------------------------------------------|---------------------------------------------------------------------------------------------------------------------------------------------------------------------------------------------------------------------------------------------------------------------------------------------------------------------------------------------------------------------------------------------------------------------------------------------------------------------------------------------------------------------------------------------------------------------------------------------------------------------------------------------------------------------------------------------------------------------------------------------------------------------------------------------------------------------------------------------------------------------------------------------------------------------------------------------------|---------------------------------------------------------------------------------------------------------------------------------------------------------------------------------------------------------------------------------------------------------------------------------------------------------------------------------------------------------------------------------------------------------------------------------------------------------------------------------------------------------------------------------------------------------------------------------------------------------------------------------------------------------------------------------------------------------------------------------------------------------------------------------------------------------------------------------------------------------------------------------------------------------------------------------------------------|
| ShStS4    | MSETKVGKVAFPFPLPGAPYPPVRNHPRWKELY<br>RLHDEWMMKYWPFSSSEKKRARIPFMNLAGFST<br>WCAPAADFRMVGARIAGIFFLADDDYIDSGKM<br>LDRIPGFKAAATGTGPHKEDQAEICHDIVFRAIK<br>ATSHPRTFDQLTKCTHEWWSNIHEPQNLDQY<br>LAVRRVNIAMFYFANAFRYTLDINLTDEQVNHPL<br>MREAEGIVSDHVLGNTDFSSYLYKEKMTNSDDTNI<br>IRILMDHEHLSYEEAKTVIEKKIRQKEQDFIGAGM<br>AVLNDPELGDREIYRWIANLQYCMGNNLAWSQ<br>ESGRYNVGVIDGISFPLSYAAEPTPEDEVVDDT<br>EESRLRELIFNVKIDPPDFDITDDAIFMNTNPHSHL<br>QDNVPLPRPENVGIGLEVVYFKRCISDALEDF<br>DGVAKGKYITGLGQQYLAFDREINSAFSAV<br>SSLLEKYNIDPRISGRDLVGTETLIDKSKSVKTTL<br>MDLFAASGNHDVEGIDSKNACYGSTAALNANV<br>WIESSWDGRYAIVFAGDIAIYAEGPARPVGGAG<br>AVALLIGDPAPLVLEPTHGSMANTYDFYKPRME<br>SEYVVDGPPSSVTTYITALDESFKAYQRKVOEGS<br>SRDVPYPYANGANGKASATKSVKLSDFYVSH<br>SPYKGLVQKAYGRLTYHDFVAHPTAPVYRDLPT<br>DILSKDASATLTDKSVKTEFAAASAMYKQVVT<br>SLLSNRCGNMYTGSLYGGLASLLTSIPSVELFDK<br>RISMFAVGGSCASTYFAIKVRGDTSHIKAKLDL<br>RLAEMDVRCPEYVVALKREETHNAPSYPNDS<br>DAGLWPGSYRLEAVDGYKRRSYTVTH | MSETKVGKVAFPFPLPGAPYPPVRNHPRWKELY<br>RLHDEWMMKYWPFSSSEKKRARIPFMNLAGFST<br>WCAPAADFRMVGARIAGIFFLADDDYIDSGKM<br>LDRIPGFKAAATGTGPHKEDQAEICHDIVFRAIK<br>ATSHPRTFDQLTKCTHEWWSNIHEPQNLDQY<br>LAVRRVNIAMFYFANAFRYTLDINLTDEQVNHPL<br>MREAEGIVSDHVLGNTDFSSYLYKEKMTNSDDTNI<br>IRILMDHEHLSYEEAKTVIEKKIRQKEQDFIGAGM<br>AVLNDPELGDREIYRWIANLQYCMGNNLAWSQ<br>ESGRYNVGVIDGISFPLSYAAEPTPEDEVVDDT<br>EESRLRELIFNVKIDPPDFDITDDAIFMNTNPHSHL<br>QDNVPLPRPENVGIGLEVVYFKRCISDALEDF<br>DGVAKGKYITGLGQQYLAFDREINSAFSAV<br>SSLLEKYNIDPRISGRDLVGTETLIDKSKSVKTTL<br>MDLFAASGNHDVEGIDSKNACYGSTAALNANV<br>WIESSWDGRYAIVFAGDIAIYAEGPARPVGGAG<br>AVALLIGDPAPLVLEPTHGSMANTYDFYKPRME<br>SEYVVDGPPSSVTTYITALDESFKAYQRKVOEGS<br>SRDVPYPYANGANGKASATKSVKLSDFYVSH<br>SPYKGLVQKAYGRLTYHDFVAHPTAPVYRDLPT<br>DILSKDASATLTDKSVKTEFAAASAMYKQVVT<br>SLLSNRCGNMYTGSLYGGLASLLTSIPSVELFDK<br>RISMFAVGGSCASTYFAIKVRGDTSHIKAKLDL<br>RLAEMDVRCPEYVVALKREETHNAPSYPNDS<br>DAGLWPGSYRLEAVDGYKRRSYTVTH | MSETKVGKVAFPFPLPGAPYPPVRNHPRWKELY<br>RLHDEWMMKYWPFSSSEKKRARIPFMNLAGFST<br>WCAPAADFRMVGARIAGIFFLADDDYIDSGKM<br>LDRIPGFKAAATGTGPHKEDQAEICHDIVFRAIK<br>ATSHPRTFDQLTKCTHEWWSNIHEPQNLDQY<br>LAVRRVNIAMFYFANAFRYTLDINLTDEQVNHPL<br>MREAEGIVSDHVLGNTDFSSYLYKEKMTNSDDTNI<br>IRILMDHEHLSYEEAKTVIEKKIRQKEQDFIGAGM<br>AVLNDPELGDREIYRWIANLQYCMGNNLAWSQ<br>ESGRYNVGVIDGISFPLSYAAEPTPEDEVVDDT<br>EESRLRELIFNVKIDPPDFDITDDAIFMNTNPHSHL<br>QDNVPLPRPENVGIGLEVVYFKRCISDALEDF<br>DGVAKGKYITGLGQQYLAFDREINSAFSAV<br>SSLLEKYNIDPRISGRDLVGTETLIDKSKSVKTTL<br>MDLFAASGNHDVEGIDSKNACYGSTAALNANV<br>WIESSWDGRYAIVFAGDIAIYAEGPARPVGGAG<br>AVALLIGDPAPLVLEPTHGSMANTYDFYKPRME<br>SEYVVDGPPSSVTTYITALDESFKAYQRKVOEGS<br>SRDVPYPYANGANGKASATKSVKLSDFYVSH<br>SPYKGLVQKAYGRLTYHDFVAHPTAPVYRDLPT<br>DILSKDASATLTDKSVKTEFAAASAMYKQVVT<br>SLLSNRCGNMYTGSLYGGLASLLTSIPSVELFDK<br>RISMFAVGGSCASTYFAIKVRGDTSHIKAKLDL<br>RLAEMDVRCPEYVVALKREETHNAPSYPNDS<br>DAGLWPGSYRLEAVDGYKRRSYTVTH |
|           | MELSSLRFPFASVFLPNLANITROAFNLKLNPHS<br>QSANSAMKSWFKSFHYVDEQKREFLEAGKFD<br>LYAALSFPDADLQHLETCLAFFWFAFSTDDLSDE<br>GDLQSKPEEVQGVVDISTALSSSHAPTSDFPYA<br>AMLQSLFNRIKTTATKGASERFIQAFKDWSSSQV<br>MQRNRKSLLLPSVEDFILMRRNTIGAAALVEAMIE<br>YSLDLDPDYVFRDPVVIAMSEATTDIMTWPNL<br>CSFNKEQADGDYQNLVCLMAQYDLGLQDAVD<br>RLVGMISTRVDRYITLKEQLPLFGAEDVTMLRKY<br>HAALEHYVGGTIVWYSSPRYFHGEQIIEKESTR<br>ILFSKASSKDCS                                                                                                                                                                                                                                                                                                                                                                                                                                                                                                                                                   | MELSSLRFPFASVFLPNLANITROAFNLKLNPHS<br>QSANSAMKSWFKSFHYVDEQKREFLEAGKFD<br>LYAALSFPDADLQHLETCLAFFWFAFSTDDLSDE<br>GDLQSKPEEVQGVVDISTALSSSHAPTSDFPYA<br>AMLQSLFNRIKTTATKGASERFIQAFKDWSSSQV<br>MQRNRKSLLLPSVEDFILMRRNTIGAAALVEAMIE<br>YSLDLDPDYVFRDPVVIAMSEATTDIMTWPNL<br>CSFNKEQADGDYQNLVCLMAQYDLGLQDAVD<br>RLVGMISTRVDRYITLKEQLPLFGAEDVTMLRKY<br>HAALEHYVGGTIVWYSSPRYFHGEQIIEKESTR<br>ILFSKASSKDCS                                                                                                                                                                                                                                                                                                                                                                                                                                                                                                                                                   | MELSSLRFPFASVFLPNLANITROAFNLKLNPHS<br>QSANSAMKSWFKSFHYVDEQKREFLEAGKFD<br>LYAALSFPDADLQHLETCLAFFWFAFSTDDLSDE<br>GDLQSKPEEVQGVVDISTALSSSHAPTSDFPYA<br>AMLQSLFNRIKTTATKGASERFIQAFKDWSSSQV<br>MQRNRKSLLLPSVEDFILMRRNTIGAAALVEAMIE<br>YSLDLDPDYVFRDPVVIAMSEATTDIMTWPNL<br>CSFNKEQADGDYQNLVCLMAQYDLGLQDAVD<br>RLVGMISTRVDRYITLKEQLPLFGAEDVTMLRKY<br>HAALEHYVGGTIVWYSSPRYFHGEQIIEKESTR<br>ILFSKASSKDCS                                                                                                                                                                                                                                                                                                                                                                                                                                                                                                                                                   |
| ShStS5    | MPHSTVHSHTLISDDSVLLFPDLISYCAVPLRVNP<br>YGRSVADDSEWLLNGAHLSDKKRKAFLRLRAG<br>DLASMCYPDASAKSLRVVADYMNLYFKLDDWTD<br>EFEAEDVGMRCVLAALRDPLHYETDKAVGKL<br>AKSFFGRFVQHGGPLRTKRFIDTMVLFRAVRQ<br>QALDRYDIDPDESIALRRDTSGCKPCFALIEF<br>AGGYDLPDAVVEHPSIQIQLDQATNDLVTWNSNDF<br>SYNVEQSRGDTHMVVMHEQGLVAQEAIDA<br>VADLCERSIDTFEOTRRSLPSWGPVDSNVESEYI<br>DGLQNWIGLSHWSFLTERYFGKDRRDVVKRKL<br>VKLLAKRC                                                                                                                                                                                                                                                                                                                                                                                                                                                                                                                                                             | MPHSTVHSHTLISDDSVLLFPDLISYCAVPLRVNP<br>YGRSVADDSEWLLNGAHLSDKKRKAFLRLRAG<br>DLASMCYPDASAKSLRVVADYMNLYFKLDDWTD<br>EFEAEDVGMRCVLAALRDPLHYETDKAVGKL<br>AKSFFGRFVQHGGPLRTKRFIDTMVLFRAVRQ<br>QALDRYDIDPDESIALRRDTSGCKPCFALIEF<br>AGGYDLPDAVVEHPSIQIQLDQATNDLVTWNSNDF<br>SYNVEQSRGDTHMVVMHEQGLVAQEAIDA<br>VADLCERSIDTFEOTRRSLPSWGPVDSNVESEYI<br>DGLQNWIGLSHWSFLTERYFGKDRRDVVKRKL<br>VKLLAKRC                                                                                                                                                                                                                                                                                                                                                                                                                                                                                                                                                             | MPHSTVHSHTLISDDSVLLFPDLISYCAVPLRVNP<br>YGRSVADDSEWLLNGAHLSDKKRKAFLRLRAG<br>DLASMCYPDASAKSLRVVADYMNLYFKLDDWTD<br>EFEAEDVGMRCVLAALRDPLHYETDKAVGKL<br>AKSFFGRFVQHGGPLRTKRFIDTMVLFRAVRQ<br>QALDRYDIDPDESIALRRDTSGCKPCFALIEF<br>AGGYDLPDAVVEHPSIQIQLDQATNDLVTWNSNDF<br>SYNVEQSRGDTHMVVMHEQGLVAQEAIDA<br>VADLCERSIDTFEOTRRSLPSWGPVDSNVESEYI<br>DGLQNWIGLSHWSFLTERYFGKDRRDVVKRKL<br>VKLLAKRC                                                                                                                                                                                                                                                                                                                                                                                                                                                                                                                                                             |
|           | MPAIIRQFILPDLFALSAPFDATNPHWKRACTES<br>RDWVNSYRVFSDEERRAFFTQGGSELLCSHAY<br>PYAGYEQFRCCDFINLLFVDEISDEQADGAW<br>ATGRIFLQVLQDPEWDDGSKVAQMTDRLARV<br>STGVKPHFRRLVHMCRDYIASVVEEAGLRER<br>EVLDESIELRRNNSAVLTCFALIPYLIDGLPDEV<br>VNDPNFSALNLAAVDMVCWANDIYSDYMEQAK<br>GLEGNNIMTVLTEMHGLTMQDASDYVGEQYKAL<br>MDLFLDNQAALRSFGPSVDADVRRYVDAVRHW<br>PRGNLSWSEFTRPYFREKREIEINTRVILRPPR<br>EPKMKSQN                                                                                                                                                                                                                                                                                                                                                                                                                                                                                                                                                               | MPAIIRQFILPDLFALSAPFDATNPHWKRACTES<br>RDWVNSYRVFSDEERRAFFTQGGSELLCSHAY<br>PYAGYEQFRCCDFINLLFVDEISDEQADGAW<br>ATGRIFLQVLQDPEWDDGSKVAQMTDRLARV<br>STGVKPHFRRLVHMCRDYIASVVEEAGLRER<br>EVLDESIELRRNNSAVLTCFALIPYLIDGLPDEV<br>VNDPNFSALNLAAVDMVCWANDIYSDYMEQAK<br>GLEGNNIMTVLTEMHGLTMQDASDYVGEQYKAL<br>MDLFLDNQAALRSFGPSVDADVRRYVDAVRHW<br>PRGNLSWSEFTRPYFREKREIEINTRVILRPPR<br>EPKMKSQN                                                                                                                                                                                                                                                                                                                                                                                                                                                                                                                                                               | MPAIIRQFILPDLFALSAPFDATNPHWKRACTES<br>RDWVNSYRVFSDEERRAFFTQGGSELLCSHAY<br>PYAGYEQFRCCDFINLLFVDEISDEQADGAW<br>ATGRIFLQVLQDPEWDDGSKVAQMTDRLARV<br>STGVKPHFRRLVHMCRDYIASVVEEAGLRER<br>EVLDESIELRRNNSAVLTCFALIPYLIDGLPDEV<br>VNDPNFSALNLAAVDMVCWANDIYSDYMEQAK<br>GLEGNNIMTVLTEMHGLTMQDASDYVGEQYKAL<br>MDLFLDNQAALRSFGPSVDADVRRYVDAVRHW<br>PRGNLSWSEFTRPYFREKREIEINTRVILRPPR<br>EPKMKSQN                                                                                                                                                                                                                                                                                                                                                                                                                                                                                                                                                               |
| ShStS7    | MATSTTQIPHSTLSLEYILPDLLRLSSPFKASMN<br>PHWATTAESSAWFSSYIFSDQELTEFAVCKV<br>ELLVAYAPHANYETFRCCDFMNLIFAIDEISDM<br>QNGEDAGETGDVFLNALRDAEWTGDSALAEMT<br>RDFRARFLRSAGPQSFRRFLKVSSEYIDCVTKEA<br>GYRERSQILDMESFKHLRRDNSGVPLMLGLLEY<br>TLGIDLDPVVFEDTALSRIYAAVDMVWVWANDV<br>YSYKVEQAKGLAGNNILSVLMAAKNIDLQDASDY<br>VGDVYAGLMKEYTEAKAELVSKSFGSKELDAV<br>KKYVDKMNENWPIGNLEWSFASMRYPFGSQSGEIK<br>RTRTVMLRPQDVLA                                                                                                                                                                                                                                                                                                                                                                                                                                                                                                                                                 | MATSTTQIPHSTLSLEYILPDLLRLSSPFKASMN<br>PHWATTAESSAWFSSYIFSDQELTEFAVCKV<br>ELLVAYAPHANYETFRCCDFMNLIFAIDEISDM<br>QNGEDAGETGDVFLNALRDAEWTGDSALAEMT<br>RDFRARFLRSAGPQSFRRFLKVSSEYIDCVTKEA<br>GYRERSQILDMESFKHLRRDNSGVPLMLGLLEY<br>TLGIDLDPVVFEDTALSRIYAAVDMVWVWANDV<br>YSYKVEQAKGLAGNNILSVLMAAKNIDLQDASDY<br>VGDVYAGLMKEYTEAKAELVSKSFGSKELDAV<br>KKYVDKMNENWPIGNLEWSFASMRYPFGSQSGEIK<br>RTRTVMLRPQDVLA                                                                                                                                                                                                                                                                                                                                                                                                                                                                                                                                                 | MATSTTQIPHSTLSLEYILPDLLRLSSPFKASMN<br>PHWATTAESSAWFSSYIFSDQELTEFAVCKV<br>ELLVAYAPHANYETFRCCDFMNLIFAIDEISDM<br>QNGEDAGETGDVFLNALRDAEWTGDSALAEMT<br>RDFRARFLRSAGPQSFRRFLKVSSEYIDCVTKEA<br>GYRERSQILDMESFKHLRRDNSGVPLMLGLLEY<br>TLGIDLDPVVFEDTALSRIYAAVDMVWVWANDV<br>YSYKVEQAKGLAGNNILSVLMAAKNIDLQDASDY<br>VGDVYAGLMKEYTEAKAELVSKSFGSKELDAV<br>KKYVDKMNENWPIGNLEWSFASMRYPFGSQSGEIK<br>RTRTVMLRPQDVLA                                                                                                                                                                                                                                                                                                                                                                                                                                                                                                                                                 |
|           | MATSNPPSTPHHESLIPDLLSLSTPFNGSTNPH<br>WAMAAPESSAWVSSYNLFSDRKRTDFITGSNEL<br>LVSHYTPHADYDAFRCCDFVNLVDEISDDQ<br>SGKAARRTGEVYLNAMRDPEWTDGSLAKMTQ<br>QFRARFLRSVGPQSFRRFLHSEYIDCVKAKEA<br>EYRERGOVLDMSDFKSLRRRENSAIRLCFLGFEFT<br>LGLIDPDSVFEDETFMKMYWASADMVCWANDV<br>YSYNVEQAKGHSNNIVTLMMAARDIDMQAASD<br>YVGEYYAELMEEYMTAKAELASKSFGSRDLDE<br>VWYVYVAMENWPIGNLEWSFKTNRYPFGLTHDE<br>VKRTRLVKPRKVVV                                                                                                                                                                                                                                                                                                                                                                                                                                                                                                                                                         | MATSNPPSTPHHESLIPDLLSLSTPFNGSTNPH<br>WAMAAPESSAWVSSYNLFSDRKRTDFITGSNEL<br>LVSHYTPHADYDAFRCCDFVNLVDEISDDQ<br>SGKAARRTGEVYLNAMRDPEWTDGSLAKMTQ<br>QFRARFLRSVGPQSFRRFLHSEYIDCVKAKEA<br>EYRERGOVLDMSDFKSLRRRENSAIRLCFLGFEFT<br>LGLIDPDSVFEDETFMKMYWASADMVCWANDV<br>YSYNVEQAKGHSNNIVTLMMAARDIDMQAASD<br>YVGEYYAELMEEYMTAKAELASKSFGSRDLDE<br>VWYVYVAMENWPIGNLEWSFKTNRYPFGLTHDE<br>VKRTRLVKPRKVVV                                                                                                                                                                                                                                                                                                                                                                                                                                                                                                                                                         | MATSNPPSTPHHESLIPDLLSLSTPFNGSTNPH<br>WAMAAPESSAWVSSYNLFSDRKRTDFITGSNEL<br>LVSHYTPHADYDAFRCCDFVNLVDEISDDQ<br>SGKAARRTGEVYLNAMRDPEWTDGSLAKMTQ<br>QFRARFLRSVGPQSFRRFLHSEYIDCVKAKEA<br>EYRERGOVLDMSDFKSLRRRENSAIRLCFLGFEFT<br>LGLIDPDSVFEDETFMKMYWASADMVCWANDV<br>YSYNVEQAKGHSNNIVTLMMAARDIDMQAASD<br>YVGEYYAELMEEYMTAKAELASKSFGSRDLDE<br>VWYVYVAMENWPIGNLEWSFKTNRYPFGLTHDE<br>VKRTRLVKPRKVVV                                                                                                                                                                                                                                                                                                                                                                                                                                                                                                                                                         |
| ShStS8    | MATSTTQIPHSTLSLEYILPDLLRLSSPFKASMN<br>PHWATTAESSAWFSSYIFSDQELTEFAVCKV<br>ELLVAYAPHANYETFRCCDFMNLIFAIDEISDM<br>QNGEDAGETGDVFLNALRDAEWTGDSALAEMT<br>RDFRARFLRSAGPQSFRRFLKVSSEYIDCVTKEA<br>GYRERSQILDMESFKHLRRDNSGVPLMLGLLEY<br>TLGIDLDPVVFEDTALSRIYAAVDMVWVWANDV<br>YSYKVEQAKGLAGNNILSVLMAAKNIDLQDASDY<br>VGDVYAGLMKEYTEAKAELVSKSFGSKELDAV<br>KKYVDKMNENWPIGNLEWSFASMRYPFGSQSGEIK<br>RTRTVMLRPQDVLA                                                                                                                                                                                                                                                                                                                                                                                                                                                                                                                                                 | MATSTTQIPHSTLSLEYILPDLLRLSSPFKASMN<br>PHWATTAESSAWFSSYIFSDQELTEFAVCKV<br>ELLVAYAPHANYETFRCCDFMNLIFAIDEISDM<br>QNGEDAGETGDVFLNALRDAEWTGDSALAEMT<br>RDFRARFLRSAGPQSFRRFLKVSSEYIDCVTKEA<br>GYRERSQILDMESFKHLRRDNSGVPLMLGLLEY<br>TLGIDLDPVVFEDTALSRIYAAVDMVWVWANDV<br>YSYKVEQAKGLAGNNILSVLMAAKNIDLQDASDY<br>VGDVYAGLMKEYTEAKAELVSKSFGSKELDAV<br>KKYVDKMNENWPIGNLEWSFASMRYPFGSQSGEIK<br>RTRTVMLRPQDVLA                                                                                                                                                                                                                                                                                                                                                                                                                                                                                                                                                 | MATSTTQIPHSTLSLEYILPDLLRLSSPFKASMN<br>PHWATTAESSAWFSSYIFSDQELTEFAVCKV<br>ELLVAYAPHANYETFRCCDFMNLIFAIDEISDM<br>QNGEDAGETGDVFLNALRDAEWTGDSALAEMT<br>RDFRARFLRSAGPQSFRRFLKVSSEYIDCVTKEA<br>GYRERSQILDMESFKHLRRDNSGVPLMLGLLEY<br>TLGIDLDPVVFEDTALSRIYAAVDMVWVWANDV<br>YSYKVEQAKGLAGNNILSVLMAAKNIDLQDASDY<br>VGDVYAGLMKEYTEAKAELVSKSFGSKELDAV<br>KKYVDKMNENWPIGNLEWSFASMRYPFGSQSGEIK<br>RTRTVMLRPQDVLA                                                                                                                                                                                                                                                                                                                                                                                                                                                                                                                                                 |
|           | (MATSNPPSTPHHESLIPDLLSLSTPFNGSTNPH<br>WAMAAPESSAWVSSYNLFSDRKRTDFITGSNEL<br>LVSHYTPHADYDAFRCCDFVNLVDEISDDQ<br>SGKAARRTGEVYLNAMRDPEWTDGSLAKMTQ<br>QFRARFLRSVGPQSFRRFLHSEYIDCVKAKEA<br>EYRERGOVLDMSDFKSLRRRENSAIRLCFLGFEFT<br>LGLIDPDSVFEDETFMKMYWASADMVCWANDV<br>YSYNVEQAKGHSNNIVTLMMAARDIDMQAASD<br>YVGEYYAELMEEYMTAKAELASKSFGSRDLDE<br>VWYVYVAMENWPIGNLEWSFKTNRYPFGLTHDE<br>VKRTRLVKPRKVVV                                                                                                                                                                                                                                                                                                                                                                                                                                                                                                                                                        | (MATSNPPSTPHHESLIPDLLSLSTPFNGSTNPH<br>WAMAAPESSAWVSSYNLFSDRKRTDFITGSNEL<br>LVSHYTPHADYDAFRCCDFVNLVDEISDDQ<br>SGKAARRTGEVYLNAMRDPEWTDGSLAKMTQ<br>QFRARFLRSVGPQSFRRFLHSEYIDCVKAKEA<br>EYRERGOVLDMSDFKSLRRRENSAIRLCFLGFEFT<br>LGLIDPDSVFEDETFMKMYWASADMVCWANDV<br>YSYNVEQAKGHSNNIVTLMMAARDIDMQAASD<br>YVGEYYAELMEEYMTAKAELASKSFGSRDLDE<br>VWYVYVAMENWPIGNLEWSFKTNRYPFGLTHDE<br>VKRTRLVKPRKVVV                                                                                                                                                                                                                                                                                                                                                                                                                                                                                                                                                        | (MATSNPPSTPHHESLIPDLLSLSTPFNGSTNPH<br>WAMAAPESSAWVSSYNLFSDRKRTDFITGSNEL<br>LVSHYTPHADYDAFRCCDFVNLVDEISDDQ<br>SGKAARRTGEVYLNAMRDPEWTDGSLAKMTQ<br>QFRARFLRSVGPQSFRRFLHSEYIDCVKAKEA<br>EYRERGOVLDMSDFKSLRRRENSAIRLCFLGFEFT<br>LGLIDPDSVFEDETFMKMYWASADMVCWANDV<br>YSYNVEQAKGHSNNIVTLMMAARDIDMQAASD<br>YVGEYYAELMEEYMTAKAELASKSFGSRDLDE<br>VWYVYVAMENWPIGNLEWSFKTNRYPFGLTHDE<br>VKRTRLVKPRKVVV                                                                                                                                                                                                                                                                                                                                                                                                                                                                                                                                                        |
| ShStS9    | MATSNPPSTPHHESLIPDLLSLSTPFNGSTNPH<br>WAMAAPESSAWVSSYNLFSDRKRTDFITGSNEL<br>LVSHYTPHADYDAFRCCDFVNLVDEISDDQ<br>SGKAARRTGEVYLNAMRDPEWTDGSLAKMTQ<br>QFRARFLRSVGPQSFRRFLHSEYIDCVKAKEA<br>EYRERGOVLDMSDFKSLRRRENSAIRLCFLGFEFT<br>LGLIDPDSVFEDETFMKMYWASADMVCWANDV<br>YSYNVEQAKGHSNNIVTLMMAARDIDMQAASD<br>YVGEYYAELMEEYMTAKAELASKSFGSRDLDE<br>VWYVYVAMENWPIGNLEWSFKTNRYPFGLTHDE<br>VKRTRLVKPRKVVV                                                                                                                                                                                                                                                                                                                                                                                                                                                                                                                                                         | MATSNPPSTPHHESLIPDLLSLSTPFNGSTNPH<br>WAMAAPESSAWVSSYNLFSDRKRTDFITGSNEL<br>LVSHYTPHADYDAFRCCDFVNLVDEISDDQ<br>SGKAARRTGEVYLNAMRDPEWTDGSLAKMTQ<br>QFRARFLRSVGPQSFRRFLHSEYIDCVKAKEA<br>EYRERGOVLDMSDFKSLRRRENSAIRLCFLGFEFT<br>LGLIDPDSVFEDETFMKMYWASADMVCWANDV<br>YSYNVEQAKGHSNNIVTLMMAARDIDMQAASD<br>YVGEYYAELMEEYMTAKAELASKSFGSRDLDE<br>VWYVYVAMENWPIGNLEWSFKTNRYPFGLTHDE<br>VKRTRLVKPRKVVV                                                                                                                                                                                                                                                                                                                                                                                                                                                                                                                                                         | MATSNPPSTPHHESLIPDLLSLSTPFNGSTNPH<br>WAMAAPESSAWVSSYNLFSDRKRTDFITGSNEL<br>LVSHYTPHADYDAFRCCDFVNLVDEISDDQ<br>SGKAARRTGEVYLNAMRDPEWTDGSLAKMTQ<br>QFRARFLRSVGPQSFRRFLHSEYIDCVKAKEA<br>EYRERGOVLDMSDFKSLRRRENSAIRLCFLGFEFT<br>LGLIDPDSVFEDETFMKMYWASADMVCWANDV<br>YSYNVEQAKGHSNNIVTLMMAARDIDMQAASD<br>YVGEYYAELMEEYMTAKAELASKSFGSRDLDE<br>VWYVYVAMENWPIGNLEWSFKTNRYPFGLTHDE<br>VKRTRLVKPRKVVV                                                                                                                                                                                                                                                                                                                                                                                                                                                                                                                                                         |
|           | (MATSNPPSTPHHESLIPDLLSLSTPFNGSTNPH<br>WAMAAPESSAWVSSYNLFSDRKRTDFITGSNEL<br>LVSHYTPHADYDAFRCCDFVNLVDEISDDQ<br>SGKAARRTGEVYLNAMRDPEWTDGSLAKMTQ<br>QFRARFLRSVGPQSFRRFLHSEYIDCVKAKEA<br>EYRERGOVLDMSDFKSLRRRENSAIRLCFLGFEFT<br>LGLIDPDSVFEDETFMKMYWASADMVCWANDV<br>YSYNVEQAKGHSNNIVTLMMAARDIDMQAASD<br>YVGEYYAELMEEYMTAKAELASKSFGSRDLDE<br>VWYVYVAMENWPIGNLEWSFKTNRYPFGLTHDE<br>VKRTRLVKPRKVVV                                                                                                                                                                                                                                                                                                                                                                                                                                                                                                                                                        | (MATSNPPSTPHHESLIPDLLSLSTPFNGSTNPH<br>WAMAAPESSAWVSSYNLFSDRKRTDFITGSNEL<br>LVSHYTPHADYDAFRCCDFVNLVDEISDDQ<br>SGKAARRTGEVYLNAMRDPEWTDGSLAKMTQ<br>QFRARFLRSVGPQSFRRFLHSEYIDCVKAKEA<br>EYRERGOVLDMSDFKSLRRRENSAIRLCFLGFEFT<br>LGLIDPDSVFEDETFMKMYWASADMVCWANDV<br>YSYNVEQAKGHSNNIVTLMMAARDIDMQAASD<br>YVGEYYAELMEEYMTAKAELASKSFGSRDLDE<br>VWYVYVAMENWPIGNLEWSFKTNRYPFGLTHDE<br>VKRTRLVKPRKVVV                                                                                                                                                                                                                                                                                                                                                                                                                                                                                                                                                        | (MATSNPPSTPHHESLIPDLLSLSTPFNGSTNPH<br>WAMAAPESSAWVSSYNLFSDRKRTDFITGSNEL<br>LVSHYTPHADYDAFRCCDFVNLVDEISDDQ<br>SGKAARRTGEVYLNAMRDPEWTDGSLAKMTQ<br>QFRARFLRSVGPQSFRRFLHSEYIDCVKAKEA<br>EYRERGOVLDMSDFKSLRRRENSAIRLCFLGFEFT<br>LGLIDPDSVFEDETFMKMYWASADMVCWANDV<br>YSYNVEQAKGHSNNIVTLMMAARDIDMQAASD<br>YVGEYYAELMEEYMTAKAELASKSFGSRDLDE<br>VWYVYVAMENWPIGNLEWSFKTNRYPFGLTHDE<br>VKRTRLVKPRKVVV                                                                                                                                                                                                                                                                                                                                                                                                                                                                                                                                                        |

Table S5. Continued.

| Gene name | Active protein sequence                                                                                                                                                                                                                                                                                                                                                                                                   | Predicted sequence by Augustus ( <i>A. oryzae</i> )                                                                                                                                                                                                                                                                                                                                                                       | Predicted sequence by Augustus ( <i>C. cinereus</i> )                                                                                                                                                                                                                                                                                                                                                                     |
|-----------|---------------------------------------------------------------------------------------------------------------------------------------------------------------------------------------------------------------------------------------------------------------------------------------------------------------------------------------------------------------------------------------------------------------------------|---------------------------------------------------------------------------------------------------------------------------------------------------------------------------------------------------------------------------------------------------------------------------------------------------------------------------------------------------------------------------------------------------------------------------|---------------------------------------------------------------------------------------------------------------------------------------------------------------------------------------------------------------------------------------------------------------------------------------------------------------------------------------------------------------------------------------------------------------------------|
| ShSTS12   | MQTPPSCESYILPDLHLISQPFKASTNPHWLKAA<br>PESSAWVSSYRIFTRDRKRMFEILGNSNELLASHTY<br>PQANYDTRFRCCDFINLLFVIDEISDDQSGEGARL<br>TGKVFNLAMRDPECTDGSILAKMTRDFRARLLQ<br>SIGAQSFRRFLKILEDYIESVTKEAEYREHGYYLD<br>MEQFKILRRQNSAVRCAFQGMVEHTLGDLPDVVVF<br>EDATFMKYVWAAIDMVWCANVYYSMELAKG<br>DNHSAANNIMSVFMAANGVSLQAASDYVGRHYA<br>RLMEEYLSARAELASKSFGSQELSDVLYKIDAM<br>ENWPIGNIESLWFKTSRYFQPQNDVFKQTLVVKL<br>KQPEVPA                         | MQTPPSCESYILPDLHLISQPFKASTNPHWLKAA<br>PESSAWVSSYRIFTRDRKRMFEILGNSNELLASHTY<br>PQANYDTRFRCCDFINLLFVIDEISDDQSGEGARL<br>TGKVFNLAMRDPECTDGSILAKMTRDFRARLLQ<br>SIGAQSFRRFLKILEDYIESVTKEAEYREHGYYLD<br>MEQFKILRRQNSAVRCAFQGMVEHTLGDLPDVVVF<br>EDATFMKYVWAAIDMVWCANVNMFPFPGYLIQ<br>DYYSYSMELAKGDNHSAANNIMSVFMAANGVSLQ<br>AASDYVGRHYARLMEEYLSARAELASKSFGSQE<br>LSDVLYKIDAMENWPIGNIESLWFKTSRYFQPQND<br>DEVKQTLVVKLKPQEVPA          | MQTPPSCESYILPDLHLISQPFKASTNPHWLKAA<br>PESSAWVSSYRIFTRDRKRMFEILGNSNELLASHTY<br>PQANYDTRFRCCDFINLLFVIDEISDDQSGEGARL<br>TGKVFNLAMRDPECTDGSILAKMTRDFRARLLQ<br>SIGAQSFRRFLKILEDYIESVTKEAEYREHGYYLD<br>MEQFKILRRQNSAVRCAFQGMVEHTLGDLPDVVVF<br>EDATFMKYVWAAIDMVWCANVNMFPFPGYLIQ<br>DYYSYSMELAKGDNHSAANNIMSVFMAANGVSLQ<br>AASDYVGRHYARLMEEYLSARAELASKSFGSQE<br>LSDVLYKIDAMENWPIGNIESLWFKTSRYFQPQND<br>DEVKQTLVVKLKPQEVPA          |
| ShSTS13   | MAATSTPLSCKPEDDGYSVPMTVPYRMPDLFTA<br>WPWKTRNPLYLEAKADSDGWLATFGDFFQKY<br>KDCILDCCDGLFCAYGLPSTDKERLRCAGDVNLT<br>LFVVDILDEYEDDATVKERMRLMDAMENPFKPR<br>PDGEWIVGEMTRQFWERTIKVSNLTSQERFMEG<br>VRDCMAGMVRESLARKASRQHDHSIHGFLKTRRD<br>SAGCNLYFALSELEVAPEAMKHSQIRELIAIQ<br>DISCIANDTFSYRREQSRGRTEDNITVMMNLTG<br>DIPGAIDVVENHHKELMKFEIEKHDKVPKWGEP<br>TDSKVKNYIESLAGWVWANARWSEFCRRYMGD<br>EGMEIMEKSRWVRAIPKERI                      | MAATSTPLSCKPEDDGYSVPMTVPYRMPDLFTA<br>WPWKTRNPLYLEAKADSDGWLATFGDFFQKY<br>KDCILDCCDGLFCAYGLPSTDKERLRCAGDVNLT<br>LFVVDILDEYEDDATVKERMRLMDAMENPFKPR<br>PDGEWIVGEMTRQFWERTIKVSNLTSQERFMEG<br>VRDCMAGMVRESLARKASRQHDHSIHGFLKTRRD<br>SAGCNLYFALSELEVAPEAMKHSQIRELIAIQ<br>DISCIANDTFSYRREQSRGRTEDNITVMMNLTG<br>DIPGAIDVVENHHKELMKFEIEKHDKVPKWGEP<br>TDSKVKNYIESLAGWVWANARWSEFCRRYMGD<br>EGMEIMEKSRWVRAIPKERI                      | MAATSTPLSCKPEDDGYSVPMTVPYRMPDLFTA<br>WPWKTRNPLYLEAKADSDGWLATFGDFFQKY<br>KDCILDCCDGLFCAYGLPSTDKERLRCAGDVNLT<br>LFVVDILDEYEDDATVKERMRLMDAMENPFKPR<br>PDGEWIVGEMTRQFWERTIKVSNLTSQERFMEG<br>VRDCMAGMVRESLARKASRQHDHSIHGFLKTRRD<br>SAGCNLYFALSELEVAPEAMKHSQIRELIAIQ<br>DISCIANDTFSYRREQSRGRTEDNITVMMNLTG<br>DIPGAIDVVENHHKELMKFEIEKHDKVPKWGEP<br>TDSKVKNYIESLAGWVWANARWSEFCRRYMGD<br>EGMEIMEKSRWVRAIPKERI                      |
| ShSTS16   | MAVATSVATPVPTPAYSAGRAPAKEKKIYLPDTL<br>AEWPWPRAINPHYAEAKESQAWAASFNAPSP<br>KAQHAFNRCDNFLLASLAYPLATKHGCRSGCDL<br>MNLFFVIDEYSDIAPVEEVROQKDIVMDALRNP<br>KPRPEGEWVGGEVARQFWALTITNASAQSQK<br>FIETFDYLDVSVVQQAEDRSESRIRDIQSYIDVRR<br>NTIGAKPSFALLELDMDLPDEVLHAPTIQSLSLA<br>TIDMCLGNDIVSYNLEQARGDASHNITIVMNELN<br>LDVNGAMRWVGFDFHKLQEKQFFFAFNLPKW<br>GNAELDAQIAYVCDGLGNVWRANDQWSEFESER<br>YFGARGLEIMETKTLAMMPIQRTEALGPQLVDDSI<br>L | MAVATSVATPVPTPAYSAGRAPAKEKKIYLPDTL<br>AEWPWPRAINPHYAEAKESQAWAASFNAPSP<br>KAQHAFNRCDNFLLASLAYPLATKHGCRSGCDL<br>MNLFFVIDEYSDIAPVEEVROQKDIVMDALRNP<br>KPRPEGEWVGGEVARQFWALTITNASAQSQK<br>FIETFDYLDVSVVQQAEDRSESRIRDIQSYIDVRR<br>NTIGAKPSFALLELDMDLPDEVLHAPTIQSLSLA<br>TIDMCLGNDIVSYNLEQARGDASHNITIVMNELN<br>LDVNGAMRWVGFDFHKLQEKQFFFAFNLPKW<br>GNAELDAQIAYVCDGLGNVWRANDQWSEFESER<br>YFGARGLEIMETKTLAMMPIQRTEALGPQLVDDSI<br>L | MAVATSVATPVPTPAYSAGRAPAKEKKIYLPDTL<br>AEWPWPRAINPHYAEAKESQAWAASFNAPSP<br>KAQHAFNRCDNFLLASLAYPLATKHGCRSGCDL<br>MNLFFVIDEYSDIAPVEEVROQKDIVMDALRNP<br>KPRPEGEWVGGEVARQFWALTITNASAQSQK<br>FIETFDYLDVSVVQQAEDRSESRIRDIQSYIDVRR<br>NTIGAKPSFALLELDMDLPDEVLHAPTIQSLSLA<br>TIDMCLGNDIVSYNLEQARGDASHNITIVMNELN<br>LDVNGAMRWVGFDFHKLQEKQFFFAFNLPKW<br>GNAELDAQIAYVCDGLGNVWRANDQWSEFESER<br>YFGARGLEIMETKTLAMMPIQRTEALGPQLVDDSI<br>L |
| ShSTS17   | MSQTYTIPDTLANWPWKRKINQHYEEVKMESAS<br>WARSFHAFSPQAQDAFDRCDFNLLASLAYPLAD<br>KQRLRTGCDLMLNFFVIDEHSDLSSVADAEQTA<br>QIIMNALMNPKEPRPHGEWVGGGEVARQYWELAI<br>KTATPKSQRFFVAADFDDYMNNAVQQAQDRTHS<br>TIRDIDSYMEVRRKTIGAWPSFALLELDMDLPED<br>FMDHPVMHELHVLISISMICLGNDIVSWNLEQSR<br>GDDTHNIVRIVMNQLDTDINGAMAWVEMHYKEL<br>EVKFMDFIKSQEWNKSMNKDISRYVEGLGNVW<br>RANDQWSEFESKRYFGDRGLEIMSKRTVSMMPK<br>RNDVNLGTQDIGPVIIVDGSIL                | (MSQTYTIPDTLANWPWKRKINQHYEEVKMESAS<br>WARSFHAFSPQAQDAFDRCDFNLLASLAYPLA<br>DKQRLRTGCDL)MNLFFVIDEHSDLSSVADAEQ<br>AQIIMNALMNPKEPRPHGEWVGGGEVARQYWEL<br>AIKTATPKSQRFFVAADFDDYMNNAVQQAQDRTH<br>TIRDIDSYMEVRRKTIGAWPSFALLELDMDLPED<br>FMDHPVMHELHVLISISMICLGNDIVSWNLEQSR<br>GDDTHNIVRIVMNQLDTDINGAMAWVEMHYKEL<br>EVKFMDFIKSQEWNKSMNKDISRYVEGLGNVW<br>RANDQWSEFESKRYFGDRGLEIMSKRTVSMMPK<br>RNDVNLGTQDIGPVIIVDGSIL                | MSQTYTIPDTLANWPWKRKINQHYEEVKMESAS<br>WARSFHAFSPQAQDAFDRCDFNLLASLAYPLAD<br>KQRLRTGCDLMLNFFVIDEHSDLSSVADAEQTA<br>QIIMNALMNPKEPRPHGEWVGGGEVARQYWELAI<br>KTATPKSQRFFVAADFDDYMNNAVQQAQDRTHS<br>TIRDIDSYMEVRRKTIGAWPSFALLELDMDLPED<br>FMDHPVMHELHVLISISMICLGNDIVSWNLEQSRG<br>DDTHNIVRIVMNQLDTDINGAMAWVEMHYKEL<br>EVKFMDFIKSQEWNKSMNKDISRGSASRVILEI<br>EA                                                                        |
| ShSTS18   | MTVVDSPQRFCIPNCLYWPWPRHINPHYQEVK<br>KASAAWAESFGAFNPKAQHAYNACDFNLLASLA<br>YPLESEERLRTGCDLMLNMFVDFEYSDVSSPKD<br>VIQQAIIIMDALRNPYAPRPDEWVGGEVTRQF<br>WKRAIKTATAGAQRRFIDAFESYTSQSVVQQAQD<br>RHHGFIRDVDSYLEMRRETIGAKPSFVVLQMDM<br>TLPDEVLHAPVIQQLSALSTDMICLGNDCISYNVE<br>QARGDDLHNIITIAMNQFDIAGAMDVVKYKHA<br>KLERKFLYLYNGLPSWGKELDPOQERYVCGLG<br>NWRASDQWGFESERYFGKKGKEIFKRRWVNL<br>MQPERAQDIGPTLVDGTRL                        | MTVVDSPQRFCIPNCLYWPWPRHINPHYQEVK<br>KASAAWAESFGAFNPKAQHAYNACDFNLLASLA<br>YPLESEERLRTGCDLMLNMFVDFEYSDVSSPKD<br>VIQQAIIIMDALRNPYAPRPDEWVGGEVTRQF<br>WKRAIKTATAGAQRRFIDAFESYTSQSVVQQAQD<br>RHHGFIRDVDSYLEMRRETIGAKPSFVVLQMDM<br>TLPDEVLHAPVIQQLSALSTDMICLGNDCISYNVE<br>QARGDDLHNIITIAMNQFDIAGAMDVVKYKHA<br>KLERKFLYLYNGLPSWGKELDPOQERYVCGLG<br>NWRASDQWGFESERYFGKKGKEIFKRRWVNL<br>MQPERAQDIGPTLVDGTRL                        | MTVVDSPQRFCIPNCLYWPWPRHINPHYQEVK<br>KASAAWAESFGAFNPKAQHAYNACDFNLLASLA<br>YPLESEERLRTGCDLMLNMFVDFEYSDVSSPKD<br>VIQQAIIIMDALRNPYAPRPDEWVGGEVTRQF<br>WKRAIKTATAGAQRRFIDAFESYTSQSVVQQAQD<br>RHHGFIRDVDSYLEMRRETIGAKPSFVVLQMDM<br>TLPDEVLHAPVIQQLSALSTDMICLGNDCISYNVE<br>QARGDDLHNIITIAMNQFDIAGAMDVVKYKHA<br>KLERKFLYLYNGLPSWGKELDPOQERYVCGLG<br>NWRASDQWGFESERYFGKKGKEIFKRRWVNL<br>MQPERAQDIGPTLVDGTRL                        |

**Table S6.** Oligonucleotides used for construction of expression plasmids. Sequences with bold characters are homologous sequences to those of the vector. Sequences with italic characters with underline are homologous sequences to those of the linker.

| Insert         | Sequence 5'-3'                                            | Size Vector       |
|----------------|-----------------------------------------------------------|-------------------|
| <i>CpSTS1</i>  | F: <b>GCAAGCTCCGGAATTC</b> ATGCCTGCTGCTATCCCTAAG          | 1297 bp           |
|                | R: <b>TACCGAGCTCGAATTC</b> TCAAGCGGGCTTTTCGTCGAC          | pTAex3-EcoRI      |
| <i>CpSTS2</i>  | F: <b>CCGAATTCGAGCTCGGTACC</b> ATGATGCAATTCTACCTTCC       | 1252 bp           |
|                | R: <b>ACTACAGATCCCCGGGTACC</b> CTATTCGAAGTCTGAATCGG       | pUARA2-KpnI       |
| <i>CpSTS3</i>  | F: <b>CCGAATTCGAGCTCGGTACC</b> ATGGTCGCCACTACAGCA         | 1341 bp           |
|                | R: <b>ACTACAGATCCCCGGGTACC</b> TTAGGCCTTGAGTGGCAAG        | pUARA2-KpnI       |
| <i>CpSTS4</i>  | F: <b>GCAAGCTCCGGAATTC</b> ATGTCCGAGTCCAACCAACAC          | 1414 bp           |
|                | R: <b>TACCGAGCTCGAATTC</b> CAGTCTAGTTGGTGTAGAGG           | pTAex3-EcoRI      |
| <i>CpSTS5</i>  | F: <b>CCGAATTCGAGCTCGGTACC</b> ATGTCTACCATAGCCACAG        | 1212 bp           |
|                | R: <b>ACTACAGATCCCCGGGTACC</b> TTACGCACGCTGTGGGAG         | pDP1031-KpnI      |
| <i>CpSTS6</i>  | F: <b>CCGAATTCGAGCTCGGTACC</b> ATGCTCACTACGCCTTACT        | 1349 bp           |
|                | R: <b>ACTACAGATCCCCGGGTACC</b> TCATACTATAATCCCAGCCG       | pDP1031-KpnI      |
| <i>CpSTS7</i>  | F: <b>CCGAATTCGAGCTCGGTACC</b> ATGACTACCAGCGGATTCC        | 1721 bp           |
|                | R: <b>ACTACAGATCCCCGGGTACC</b> CTAATCCTCACCGGGATC         | pDP1031-KpnI      |
| <i>CpSTS8</i>  | F: <b>CCGAATTCGAGCTCGGTACC</b> ATGTCCAACACCTTCATTGT       | 1368 bp           |
|                | R: <b>ACTACAGATCCCCGGGTACC</b> TTACATGATGGACGCGAAC        | pDP1031-KpnI      |
| <i>CpSTS9</i>  | F: <b>CCGAATTCGAGCTCGGTACC</b> ATGACGGTACTTCAATTTGTG      | 1282 bp           |
|                | R: <b>ACTACAGATCCCCGGGTACC</b> TTATCCACAAGTTTCACAGT       | pDP1031-KpnI      |
| <i>CpSTS10</i> | F: <b>CCGAATTCGAGCTCGGTACC</b> ATGGCTCCAAGCTATCAGC        | 1277 bp           |
|                | R: <b>ACTACAGATCCCCGGGTACC</b> TCAAGGCAACATTGTCTG         | pDP1031-KpnI      |
| <i>CpSTS11</i> | F: <b>CCGAATTCGAGCTCGGTACC</b> ATGTCCAGAAATCTCCTTC        | 1262 bp           |
|                | R: <b>ACTACAGATCCCCGGGTACC</b> CTAATCGGCGAGATCGAC         | pDP1031-KpnI      |
| <i>CpSTS12</i> | F: <b>CCGAATTCGAGCTCGGTACC</b> ATGGAAGCCTGCCAGTAA         | 1267 bp           |
|                | R: <b>ACTACAGATCCCCGGGTACC</b> TCATAAGTAATTCTTCCGACC      | pDP1031-KpnI      |
| <i>CpSTS13</i> | F: <b>CCGAATTCGAGCTCGGTACC</b> ATGCCCAAGACCCGCCT          | 1285 bp           |
|                | R: <b>ACTACAGATCCCCGGGTACC</b> CTAGTCTGAAATATGGACGT       | pUSA2-KpnI        |
| <i>CpSTS14</i> | F: <b>CCGAATTCGAGCTCGGTACC</b> ATGAACGTAATGAACACTCC       | 1235 bp           |
|                | R: <b>ACTACAGATCCCCGGGTACC</b> TCAGCTCAAGCTCGTAGTT        | pDP1031-KpnI      |
| <i>CpSTS15</i> | F: <b>CCGAATTCGAGCTCGGTACC</b> ATGTCATCCACCGACCC          | 1103 bp           |
|                | R: <b>ACTACAGATCCCCGGGTACC</b> CTACAGCCGATTATATCTTC       | pDP1031-KpnI      |
| <i>CpSTS16</i> | F: <b>CCGAATTCGAGCTCGGTACC</b> ATGCCTCTCCCAGTAAACG        | 1285 bp           |
|                | R: <b>ACTACAGATCCCCGGGTACC</b> TTACTCATTCAAGTTGACACT      | pUSA2-KpnI        |
| <i>CpSTS17</i> | F: <b>CCGAATTCGAGCTCGGTACC</b> ATGAACTCAGACCTGCAATC       | 1102 bp           |
|                | R: <b>ACTACAGATCCCCGGGTACC</b> TTAGGCAGCTACGGCGCG         | pDP1031-KpnI      |
| <i>CpSTS18</i> | F: <b>CCGAATTCGAGCTCGGTACC</b> ATGGTCCACTGGAATCACC        | 1625 bp           |
|                | R: <b>ACTACAGATCCCCGGGTACC</b> TCATGAATCACCGTACAGC        | pDP1031-KpnI      |
| <i>ShSTS1</i>  | F: <b>CAAGCTCCGAATTCGAGCTCGGTACC</b> ATGGAGTCCGTCAGGGAAAC | 1236 bp           |
|                | R: <b>ATCCCCGGGTACC</b> <u>TACTCAAACGTG</u> CTAAGCTTTATG  | pDP1032-KpnI/SpeI |
| <i>linker</i>  | F: <u>CACGTTGAGTAAGT</u> ATCCCGGGATCTGTAG                 | 869 bp            |
|                | R: <u>CCACGACTGTCA</u> TCTAGTGC GGCCGCTAGCT               | pDP1032-KpnI/SpeI |



| Insert             | Sequence 5'-3'                                                                                                 | Size<br>Vector               |
|--------------------|----------------------------------------------------------------------------------------------------------------|------------------------------|
| <i>ShSTS18</i>     | F: <u>CGGCCGCACTAGATGACAGTCGTGGACAGC</u><br>R: <u>TCATCGGGTACGACTACCCGGGTCATCATAATCTGGTCCCATCAAC</u>           | 1292 bp<br>pDP1032-KpnI/SpeI |
| <i>ShSTS3</i>      | F: <u>CCGAATTCGAGCTCGGTACC</u> ATGTCTACTGCGAAACCTG<br>R: <u>ACTACAGATCCCCGGGTACC</u> CTAGGGCACAGTCACCTC        | 1333 bp<br>pDP1031-KpnI      |
| <i>ShSTS4</i>      | F: <u>CCGAATTCGAGCTCGGTACC</u> ATGTCTGAAACAAAGTTGG<br>R: <u>ACTACAGATCCCCGGGTACC</u> TCAATGGGTGACGGTATAC       | 3335 bp<br>pDP1031-KpnI      |
| <i>ShSTS5</i>      | F: <u>CCGAATTCGAGCTCGGTACC</u> ATGGAACCTCTTCACTGC<br>R: <u>ACTACAGATCCCCGGGTACC</u> TCAAGAGCAATCCTTGCTG        | 1493 bp<br>pDP1031-KpnI      |
| <i>ShSTS7</i>      | F: <u>CCGAATTCGAGCTCGGTACC</u> ATGCCTCATTCCACCGTG<br>R: <u>ACTACAGATCCCCGGGTACC</u> TCAACACCTCTTCGCGAG         | 1273 bp<br>pDP1031-KpnI      |
| <i>ShSTS8</i>      | F: <u>CCGAATTCGAGCTCGGTACC</u> ATGCCTGCTATCATCAGAC<br>R: <u>ACTACAGATCCCCGGGTACC</u> TCAATCTGGCTCTTCATCT       | 1293 bp<br>pDP1031-KpnI      |
| <i>ShSTS10</i>     | F: <u>CCGAATTCGAGCTCGGTACC</u> ATGGGAGCGACTTCGACG<br>R: <u>ACTACAGATCCCCGGGTACC</u> CTACGCAAGAACATCTTGAG       | 1250 bp<br>pDP1031-KpnI      |
| <i>ShSTS11</i>     | F: <u>CAAGCTCCGAATTCGAGCTCGGTACC</u> ATGGTACTTCAAATCCTC<br>R: <u>ATCCCCGGGTACCCTAAACAACGACTTTC</u> CG          | 1296 bp<br>pDP1032-KpnI/SpeI |
| <i>linker</i>      | F: <u>AGTCGTTGTTAGGGTACCCGGGGATCTGTAG</u><br>R: <u>TAGCGACAGCCATCTAGTGC</u> GGCCGCTAGCT                        | 869 bp<br>pDP1032-KpnI/SpeI  |
| <i>ShSTS16</i>     | F: <u>CGGCCGCACTAGATGGCTGTCGCTAC</u> CTCTG<br>R: <u>TCATCGGGTACGACTACCCGGGTCATC</u> ACAAAATGGAGTCATCAACAAG     | 1447 bp<br>pDP1032-KpnI/SpeI |
| <i>ShSTS12</i>     | F: <u>CCGAATTCGAGCTCGGTACC</u> ATGCAGACTCCACCCTCT<br>R: <u>ACTACAGATCCCCGGGTACC</u> CTAGGCAGGAACCTCCTG         | 1256 bp<br>pDP1031-KpnI      |
| <i>ShSTS13</i>     | F: <u>CCGAATTCGAGCTCGGTACC</u> ATGGCAGCTACGTCCACC<br>R: <u>ACTACAGATCCCCGGGTACC</u> TTATATACCATCTAATCCGTG      | 1409 bp<br>pDP1031           |
| <i>ShSTS17</i>     | F: <u>CAAGCTCCGAATTCGAGCTCGGTACC</u> ATGTCGACATATACAATAC<br>R: <u>ACTACAGATCCCCGGGTACC</u> TTACAGAATGGACCCATCG | 1322 bp<br>pDP1031-KpnI      |
| <i>CpSTS5-Fr1</i>  | F: <u>GTGCATCATCATCATCATATCGAAGGTAGGCATATG</u> CTACCATAGCCAC<br>R: <u>TTGTAGGCGTATTCGATAA</u> AGAGCCAGC        | 607 bp<br>pColdI-NdeI        |
| <i>CpSTS5-Fr2</i>  | F: <u>CTTATCGAATACGCCTACAACCTGC</u> ACATTC<br>R: <u>CTCGAGGGTACCGAGCTCCATATG</u> TTACGCACGCTGTGGGAG            | 428 bp<br>pColdI-NdeI        |
| <i>CpSTS7-Fr1</i>  | F: <u>CGGTACCCTCGAGGGATCCGAATTC</u> ATGACTACCAGCGGATTC<br>R: <u>GAGAATACATCATTGGCAATGATC</u> AGCATATC          | 664 bp<br>pColdI-EcoRI       |
| <i>CpSTS7-Fr2</i>  | F: <u>ATTGCCAATGATGTATTCTC</u> ATTCAAAGTCGAG<br>R: <u>TTACCTATCTAGACTGCAGGTCG</u> ACCTATCGCCGAAGGAGAGTAG       | 464 bp<br>pColdI             |
| <i>CpSTS8-Fr1</i>  | F: <u>AAGGTAGGCATATGGAGCTCGGTACC</u> ATGTCCAACACCTTCATTG<br>R: <u>ATAGCAAATTGCCAATATCCATAG</u> ACGTCCTG        | 140 bp<br>pColdI-kpnI/BamHI  |
| <i>CpSTS8-Fr2</i>  | F: <u>GTCATGGATATTGGCAATTTGCTATGG</u> CTTTATG<br>R: <u>AAGATCTAGAAACTCTTTAACTA</u> GCCGGCAG                    | 540bp<br>pColdI-kpnI/BamHI   |
| <i>CpSTS8-Fr3</i>  | F: <u>GGCTAGTTAAAGAGTTTCTAGATCTT</u> CATGTCGG<br>R: <u>CTCAAACGACCATCTGTCGTTGCCA</u> ATGACAG                   | 112 bp<br>pColdI-kpnI/BamHI  |
| <i>CpSTS13-Fr1</i> | F: <u>AAGGTAGGCATATGGAGCTCGGTACC</u> ATGCCCAAGACCCGCCT<br>R: <u>GTAGACATGTTTTGAATA</u> CCGTAGAAATCCACTCTCTTGCC | 134 bo<br>pColdI-kpnI/BamHI  |

| Insert             | Sequence 5'-3'                                                                                                  | Size<br>Vector                |
|--------------------|-----------------------------------------------------------------------------------------------------------------|-------------------------------|
| <i>CpSTS13-Fr2</i> | F: <i>TTCTACGGTATTCAAAACATGTCTACGGACC</i><br>R: <i>CCTTCTACGAAAATCTTGAAGTATTGCGCAAAG</i>                        | 258 bp<br>pColdI-kpnI/BamHI   |
| <i>CpSTS13-Fr3</i> | F: <i>CAATACTTCAAGATTTTCGTAGAAGGAACCTC</i><br>R: <i>CTGCAGGTCGACAAGCTTGAATTCGGATCCCTAGTCTGAAATATGGACG</i>       | 652 bp<br>pColdI-kpnI/BamHI   |
| <i>CpSTS14-Fr1</i> | F: <b>AGGCATATGGAGCTCGGTACC</b> ATGAACGTAATGAACACTCCCATC<br>R: <i>ATCGAGAGATAGGAAGACACCGGCTTCCACC</i>           | 623 bp<br>pColdI-KpnI/HindIII |
| <i>CpSTS14-Fr2</i> | F: <i>CCGGTGTCTTCTATCTCTCGATCTCGC</i><br>R: <b>ATCTAGACTGCAGGTCGACAAGCTT</b> CAGCTCAAGCTCGTAGTTC                | 484 bp<br>pColdI-KpnI/HindIII |
| <i>CpSTS16-Fr1</i> | F: <b>GTGCATCATCATCATCATATCGAAGGTAGGCATATGCCTCTCCCAGTA</b><br>AC<br>R: <i>ATACATTATGCAGATCCATGACAAAACG</i>      | 246 bp<br>pColdI-NdeI         |
| <i>CPSTS16-Fr2</i> | F: <i>CATGGATCTGCATAATGTATCATGGCTTTTC</i><br>R: <b>CTCGAGGGTACCGAGCTCCATATGTT</b> ACTCATTCAAGTTGACAC            | 798 bp<br>pColdI-NdeI         |
| <i>CpSTS17-Fr1</i> | F: <b>GAGCTCGGTACCCTCGAGGGATCCGAATTCATGAACTCAGACCTGCAATC</b><br>R: <i>CAAGTTTGGTAGCCTTGTTTCGCTCCAGACC</i>       | 297 bp<br>pColdI-EcoRI        |
| <i>CpSTS17-Fr2</i> | F: <i>GGAGGCGAACAAGGCTACCAAACTGTGTGATCG</i><br>R: <i>ACTGGTAGAGAACCAGAGGCCGACGTC</i> TAATTC                     | 263 bp<br>pColdI-EcoRI        |
| <i>CpSTS17-Fr3</i> | F: <i>ACGTCGGCCTCTGGTTCTCTACCAGTCTTTTCTATGGGG</i><br>R: <b>AGAGATTACCTATCTAGACTGCAGGTCGACTTAGGCAGCTACGGCGCG</b> | 433 bp<br>pColdI-EcoRI        |
| <i>ShSTS3-Fr1</i>  | F: <b>AAGGTAGGCATATGGAGCTCGGTACC</b> ATGTCTACTGCGAAACCTG<br>R: CATCCTCTGCACTCGAAGATACTCCATCATGTC                | 461 bp<br>pColdI              |
| <i>ShSTS3-Fr2</i>  | F: TGGAGTATCTTCGAGTGCAGAGGATGGCACC<br>R: CATATCTCGTAGAATGATGATGCCACCAAGTATTCC                                   | 448 bp<br>pColdI              |
| <i>ShSTS3-Fr3</i>  | F: GTGGCATCATCATTCTACGAGATATGCAGAG<br>R: <b>TTGAATTCGGATCCCTCGAGGGTACC</b> ATGAACCCGGATCCTTTC                   | 242 bp<br>pColdI              |
| <i>ShSTS5-Fr1</i>  | F: <b>AGGCATATGGAGCTCGGTACC</b> ATGGAACCTCTTCACTGCG<br>R: <i>ATTAAACAGGCTCTGGAGCATAGCCGCG</i>                   | 416 bp<br>pColdI-KpnI         |
| <i>ShSTS5-Fr2</i>  | F: <i>TGCTCCAGAGCCTGTTAATCGTATCAAGACG</i><br>R: <b>TTACCTATCTAGACTGCAGGTCGACT</b> AGGAGCAATCCTTGCTG             | 689 bp<br>pColdI-KpnI         |
| <i>ShSTS10-Fr1</i> | F: <b>GAGCTCGGTACCCTCGAGGGATCCGAATTCATGGGAGCGACTTCGACG</b><br>R: <i>TCGGGCACGAAAGTCCCTTGTCAATTCGCG</i>          | 410 bp<br>pColdI-EcoRI/SalI   |
| <i>ShSTS10-Fr2</i> | F: <i>AAATGACAAGGGACTTTCGTGCCGATTCTTG</i><br>R: <i>ATGAGTACACATCGTTTCGCCACCATACCATATC</i>                       | 289 bp<br>pColdI-EcoRI/SalI   |
| <i>ShSTS10-Fr3</i> | F: <i>ATGGTGGGCGAACGATGTGTACTCATATAAGGTG</i><br>R: <b>AGAGATTACCTATCTAGACTGCAGGTCGACCT</b> ACGCAAGAACATCTTG     | 351 bp<br>pColdI-EcoRI/SalI   |
| <i>ShSTS12-Fr1</i> | F: <b>AGGCATATGGAGCTCGGTACC</b> ATGCAGACTCCACCCTCTTG<br>R: <i>ACGCGCGCGAAAGTCCCTTGTCATCTTCGCTAAAATAG</i>        | 386 bp<br>pColdI-KpnI         |
| <i>ShSTS12-Fr2</i> | F: <i>TGACAAGGGACTTTCGCGCGCTTCTTTC</i><br>R: <b>GGTCGACAAGCTTGAATTCGGATCCCTAGGCAGGAACTTCCTGAGG</b>              | 646 bp<br>pColdI-KpnI         |
| <i>ShSTS13-Fr1</i> | F: <b>AGGCATATGGAGCTCGGTACC</b> ATGGCAGTACGTCCACC<br>R: <i>CGTAGTCGTTCTTTGTCAAGTGGAAAGC</i>                     | 262 bp<br>pColdI-KpnI/SalI    |
| <i>ShSTS13-Fr2</i> | F: <i>ACTGACAAAGAACGACTACGATGCGCAG</i><br>R: <b>TTACCTATCTAGACTGCAGGTCGACTT</b> ATATACCATCTAATCCGTGAATC         | 847 bp<br>pColdI-KpnI/SalI    |

| Insert                                 | Sequence 5'-3'                                                                                               | Size<br>Vector                   |
|----------------------------------------|--------------------------------------------------------------------------------------------------------------|----------------------------------|
| <i>ShSTS18-Fr1</i>                     | F: <b>AGGCATATGGAGCTCGGTACCATGACAGTCGTGGACAGC</b><br>R: <b>GCCAAACAAGTTGAAGTCGCAGGCATTATAC</b>               | 178 bp<br>pColdI-KpnI/BamHI      |
| <i>ShSTS18-Fr2</i>                     | F: <b>TGCGACTTCAACTTGTGGCTTCGCTGG</b><br>R: <b>GGTCGACAAGCTTGAATTCGGATCCTCATAATCTGGTCCCATCAAC</b>            | 878 bp<br>pColdI-KpnI/BamHI      |
| <i>SC103-up</i>                        | F: <b>TTGTA AACGACGGCCAGTGATTAATTTTTTTCGTTTAAAGTCTGTC</b><br>R: <b>GAATGAACCCGGATCCGGAGAATCAGTCCAAGAAC</b>   | pUC19-<br>HindIII/EcoRI          |
| <i>SC103-down</i>                      | F: <b>CTGATTCTCCGGATCCGGGTTCAATTTCGGTTC</b><br>R: <b>CTATGACCATGATTACGCCAGTAAGAGCTTGTGGGAG</b>               | pUC19-<br>HindIII/EcoRI          |
| <i>PamyB-MCS-TamyB</i>                 | F: <b>CTGATTCTCCGGATCCCATCATGGTGTTTGATCA</b><br>R: <b>GAATGAACCCGGATCCTTTCCTATAATAGACTAGCGT</b>              | 825 bp<br>pUC19-SC103-<br>BamHI  |
| <i>PamyB-MCS-TamyB-PamyB-MCS-TamyA</i> | F: <b>CTGATTCTCCGGATCTCATGGTGTTTGATCATTTTA</b><br>R: <b>GAATGAACCCGGATCCGGTGAAGAGTCTTAACGT</b>               | 1752 bp<br>pUC19-SC103-<br>BamHI |
| <i>U6P-SC103</i>                       | F: <b>TCGAGCTCGGTACCCTAATGCCGGCTCATTCAAAC</b><br>R: <b>TATAGAAGGAAGGGTAAAGCACTTGTCTTCTTTACAATG</b>           | ppAsACas9-SmaI                   |
| <i>SC103-U6T</i>                       | F: <b>GCTTTACCCTTCCTTCTATAGTTTTAGAGCTAGAAATAGC</b><br>R: <b>CAATTGCCCGATCCCCAGCAGCTCTATATCACGTGACG</b>       | ppAsACas9-SmaI                   |
| <i>U6&amp;-SC103-U6T</i>               | F: <b>TCGAGCTCGGTACCCTAATGCCGGCTCATTCAAAC</b><br>R: <b>CAATTGCCCGATCCCCAGCAGCTCTATATCACGTGACG</b>            | ppAsACas9-SmaI                   |
| <i>ple3</i>                            | F: <b>CAGCAAGCTCCGAATTCGAGCTCGGTACATGGGTCTATCCGAAGATC</b><br>R: <b>ATCCCCGGGTACTCAGTGGTGGATTCCATTGC</b>      | 3039 bp<br>pDP1032-KpnI/SpeI     |
| <i>ple4</i>                            | F: <b>CGGCCGCACTAGTATGAGAATACCTAACATCTTTC</b><br>R: <b>TCATCGGGTACGACTACCCGGGTCACTAGTCTACTCTGCAATGTACAAC</b> | 1285 bp<br>pDP1032-KpnI/SpeI     |
| <i>linker (ple3-ple4)</i>              | F: <b>AATCCACCACTGAGTACCCGGGGATCTGTAGTAG</b><br>R: <b>TAGGTATTCTCATACTAGTGCGGCCGCTAGCTC</b>                  | pDP1032-KpnI/SpeI                |
| <i>ple5</i>                            | F: <b>CCGAATTCGAGCTCGATGCTATCTGTGCACCTTC</b><br>R: <b>ACTACAGATCCCCGGCTACAATGCAGCGAACGC</b>                  | 2297 bp<br>pDP1031-KpnI          |
| <i>ple6</i>                            | F: <b>ATCGATTTGAGCTAGATGAATCTTCTGAAATCAAGG</b><br>R: <b>TAGTGC GGCCGCTAGCTAGTAGTCTGCAACCTCG</b>              | 2160 bp<br>pDP1032-NheI          |
| <i>ple7</i>                            | F: <b>CAGCAAGCTCCGAATTCGAGCTCGGTACATGGAAGGCAAGGTGAGCTCC</b><br>R: <b>ATCCCCGGGTACTTAGATGACACTCCATGCGT</b>    | 958 bp<br>pDP1032-KpnI/SpeI      |
| <i>ple1</i>                            | F: <b>CCGCACTAGTATGGCACCGTCTAATACAG</b><br>R: <b>TTTCATCATCGGGTACGACTACCCGGGTCACTAAGCGCTGGTAGGCTTTG</b>      | 2124 bp<br>pDP1032-KpnI/SpeI     |
| <i>linker (ple7-ple1)</i>              | F: <b>TGTCATCTAGGTACCCGGGGATCTGTAGTAG</b><br>R: <b>ACGGTGCCATACTAGTGCGGCCGCTAGC</b>                          |                                  |
